# Supplementary material for: Chiral phosphoric acid-catalyzed enantioselective synthesis of biphenyl-bridged ε-sultams via the Friedel–Crafts reactions of cyclic N-sulfonylimines with indolizines
Source: Royal Society of Chemistry journal article supplement (doi:10.1039/d4qo01037j), 2024-01-01
Supplement: d4qo01037j1.pdf [file d4qo01037j1.pdf]

# Chiral Phosphoric Acid-Catalyzed Enantioselective Synthesis of Biphenyl-Bridged $\epsilon$ -Sultams via Friedel-Crafts Reactions of Cyclic N-Sulfonylimines with Indolizines

Qian Li,<sup>a</sup> Yuan-Yuan Xu,<sup>a</sup> Bi-Xi Feng,<sup>b</sup> Tao Wang<sup>\*,a</sup> and You-Qing Wang<sup>\*,a</sup>

<sup>a</sup> Henan Key Laboratory of Natural Medicine Innovation and Transformation, Henan University,  
Kaifeng, Henan 475004, P. R. China.

<sup>b</sup> Henan Nuclear Technology Application Center, Zhengzhou, Henan 450044, P. R. China.

E-mail: [wthenu@henu.edu.cn](mailto:wthenu@henu.edu.cn); [yqwang@henu.edu.cn](mailto:yqwang@henu.edu.cn)

## Supporting Information

### Table of Contents

|                                                     |    |
|-----------------------------------------------------|----|
| 1. GENERAL INFORMATION .....                        | 1  |
| 2. MORE RESULTS ON THE CONDITION OPTIMIZATION ..... | 2  |
| 3. CONTROL EXPERIMENT.....                          | 2  |
| 4. EXPERIMENTAL SECTION .....                       | 3  |
| 5. X-RAY STRUCTURE FOR COMPOUND 3DA.....            | 12 |
| 6. COPY OF NMR.....                                 | 13 |
| 7. COPY OF HPLC .....                               | 48 |
| 8. REFERENCES .....                                 | 66 |

### 1. General information

The products were purified by column chromatography on silica gel (200-300 mesh). For thin-layer chromatography (TLC) analysis, silica gel plates (HSGF254) were used. Visualization of the developed TLC plates was performed with ultraviolet irradiation 254 nm. <sup>1</sup>H NMR, <sup>13</sup>C NMR, <sup>19</sup>F NMR spectra were recorded on Bruker DRX-300 or Bruker DRX-400 spectrometers. Chemical shifts ( $\delta$ ) are quoted in ppm relative to TMS (<sup>1</sup>H). Coupling constants ( $J$ ) are quoted in Hz. The following abbreviations were used to show the multiplicities: s: singlet, d: doublet, t: triplet, q: quadruplet, m: multiplet, dd: doublet of doublets, qt: quadruplet of triplets, tt: triplet of triplets, tq: triplet of quadruplets, tqt: triplet of quadruplet of triplets. The residual solvent signals were used as references (CDCl<sub>3</sub>:  $\delta_{\text{H}} = 7.26$  ppm,  $\delta_{\text{C}} = 77.00$  ppm). The *ee* values determination was carried out using chiral HPLC with Daicel Chiralpak INA-H, INC-H and ND-H column on Agilent 1200 LC instrument. The solvents were distilled from appropriate drying agents prior to use, unless otherwise noted.

Seven-membered cyclic N-sulfonylimines (**1**)<sup>[1]</sup>, 2-indolizine esters (**2**)<sup>[2]</sup> and six-membered cyclic N-sulfonylimine (**5**)<sup>[3]</sup> were prepared according to the literature. The CPAs were purchased from Daicel Chiral technologies (China)CO., LTD and direct used without additional process. The racemic products were prepared by running reactions with a racemic catalyst.

## 2. More results on the condition optimization

**Table S1. Screening for more chiral CPA catalysts and solvents<sup>a,b,c</sup>**

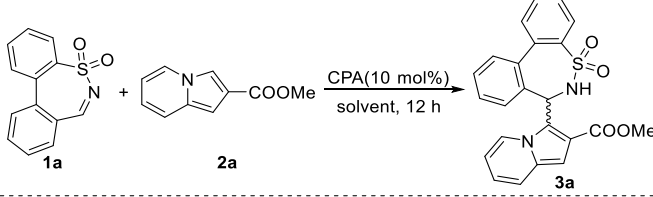

(R)-S1, G=4-NO<sub>2</sub>C<sub>6</sub>H<sub>4</sub>  
 (R)-S2, G=4-(Ph)C<sub>6</sub>H<sub>4</sub>  
 (R)-S3, G=3,5-(CH<sub>3</sub>)<sub>2</sub>C<sub>6</sub>H<sub>3</sub>  
 (R)-S4, G=3,5-(Ph)<sub>2</sub>C<sub>6</sub>H<sub>3</sub>  
 (R)-S5, G=4-(2'-Naphthyl)C<sub>6</sub>H<sub>4</sub>  
 (S)-S6, G=SiPh<sub>3</sub>  
 (S)-S7, G=9-Anthryl  
 (S)-S8, G=1-Pyrenyl

| Entry | Catalyst  | Solvent                         | Yield(%) <sup>b</sup> | ee(%) <sup>c</sup> |
|-------|-----------|---------------------------------|-----------------------|--------------------|
| 1     | <b>S1</b> | toluene                         | trace                 | -                  |
| 2     | <b>S2</b> | toluene                         | 8                     | 0                  |
| 3     | <b>S3</b> | toluene                         | trace                 | -                  |
| 4     | <b>S4</b> | toluene                         | 86                    | 80                 |
| 5     | <b>S5</b> | toluene                         | 87                    | 71                 |
| 6     | <b>S6</b> | toluene                         | trace                 | -                  |
| 7     | <b>S7</b> | toluene                         | 90                    | 4                  |
| 8     | <b>S8</b> | toluene                         | 89                    | 91                 |
| 9     | <b>C8</b> | CH <sub>2</sub> Cl <sub>2</sub> | 57                    | 91                 |
| 10    | <b>C8</b> | DMF                             | NR                    | -                  |
| 11    | <b>C8</b> | PhCF <sub>3</sub>               | 95                    | 93                 |
| 12    | <b>C8</b> | <i>m</i> -xylene                | 96                    | 94                 |
| 13    | <b>C8</b> | <i>p</i> -xylene                | 93                    | 94                 |

<sup>a</sup>Unless otherwise noted, reaction was performed with **1a** (0.05 mmol), **2a** (0.06 mmol), catalyst (10 mol%) in solvent (1.0 mL) at r.t. for 12 h. <sup>b</sup>Isolated yields. <sup>c</sup>Determined by HPLC analysis using a chiral column, and the minus *ee* value indicates that the opposite enantiomer was obtained as the major form.

## 3. Control Experiment.

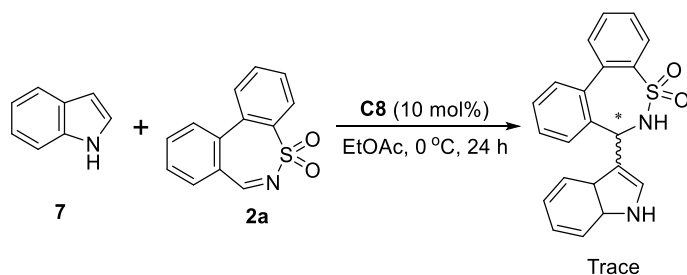

**Scheme S2** The control experiment.

Indole **7** (0.06 mmol, 1.2 equiv.), **C8** (2.8 mg, 0.005 mmol, 10 mol%) and EtOAc (1.0 mL) were added in an oven-dried 5 mL round-bottomed flask. It was allowed to stir for 10 min in air at 0 °C. Then, seven-membered cyclic N-sulfonyl mines **2a** (0.05 mmol, 1.0 equiv.) was added and it was allowed to stir at 0 °C for 24 h. At the end of the reaction, TLC monitoring of the reaction revealed that the reaction produced trace products.

#### 4. Experimental section

Typical procedure for synthesis of **3**: Indolizine **2** (0.06 mmol, 1.2 equiv.), **C8** (2.8 mg, 0.005 mmol, 10 mol%) and EtOAc (1.0 mL) were added in an oven-dried 5 mL round-bottomed flask. It was allowed to stir for 10 min in air at 0 °C. Then, seven-membered cyclic N-sulfonylimines **1** (0.05 mmol, 1.0 equiv.) was added and the mixture was stirred at 0 °C for 12-48 h. The crude product was directly purified by flash column chromatography on silica gel (petroleum ether/ethyl acetate, 6:1) to afford the product **3**.

(*S*)-Methyl-3-(5,5-dioxido-6,7-dihydrodibenzo[d,f][1,2]thiazepin-7-yl)indolizine-2-carboxylate (**3aa**): white solid (20.1 mg, 96% yield, 99% *ee*);  $R_f$  = 0.50 (petroleum ether/ethyl acetate, 3:1); mp: 121.8–132.9 °C.  $[\alpha]_D^{25} = +176.9$  ( $c = 1.0$ , CHCl<sub>3</sub>). <sup>1</sup>H NMR (300 MHz, CDCl<sub>3</sub>)  $\delta$  8.75 (d,  $J = 7.4$  Hz, 1H), 8.02 (d,  $J = 7.8$  Hz, 1H), 7.77 (t,  $J = 7.5$  Hz, 1H), 7.67 (d,  $J = 7.6$  Hz, 1H), 7.58 (t,  $J = 7.6$  Hz, 1H), 7.47 (s, 1H), 7.44 (d,  $J = 4.3$  Hz, 2H), 7.25 – 7.15 (m, 1H), 6.92 (d,  $J = 3.6$  Hz, 1H), 6.88 (d,  $J = 7.0$  Hz, 2H), 6.68 (t,  $J = 6.9$  Hz, 1H), 6.58 (d,  $J = 7.8$  Hz, 1H), 5.36 (s, 1H), 3.67 (s, 3H). <sup>13</sup>C{<sup>1</sup>H} NMR (75 MHz, CDCl<sub>3</sub>)  $\delta$  165.5, 140.3, 138.9, 137.1, 133.7, 133.4, 132.6, 130.8, 130.2, 129.6, 129.1, 128.8, 128.0, 126.4, 125.7, 121.7, 120.3, 119.3, 117.5, 112.6, 101.4, 52.7, 51.6. HRMS (ESI) calcd for C<sub>23</sub>H<sub>19</sub>N<sub>2</sub>O<sub>4</sub>S<sup>+</sup>  $m/z$  419.1060 [M+H]<sup>+</sup>, found: 419.1071. HPLC (Chiralpak INA-H column, *n*-hexane/*i*-PrOH = 80/20, 25 °C,  $\lambda = 254$  nm 1.0 mL/min):  $t_1 = 9.38$  min (major),  $t_2 = 13.38$  min (minor).

(*S*)-Ethyl-3-(5,5-dioxido-6,7-dihydrodibenzo[d,f][1,2]thiazepin-7-yl)indolizine-2-carboxylate (**3ab**): white solid (19.9 mg, 92% yield, 98% *ee*);  $R_f$  = 0.5 (petroleum ether/ethyl acetate, 3:1); mp: 189.4–190.6 °C.  $[\alpha]_D^{25} = +205.7$  ( $c = 1.0$ , CHCl<sub>3</sub>). <sup>1</sup>H NMR (300 MHz, CDCl<sub>3</sub>)  $\delta$  8.74 (d,  $J = 7.2$  Hz, 1H), 8.05 (d,  $J = 7.8$  Hz, 1H), 7.78 (t,  $J = 7.5$  Hz, 1H), 7.67 (d,  $J = 7.6$  Hz, 1H), 7.60 (t,  $J = 7.7$  Hz, 1H), 7.54 – 7.39 (m, 3H), 7.21 (dt,  $J = 8.6, 4.3$  Hz, 1H), 6.89 (d,  $J = 14.0$  Hz, 3H), 6.68 (t,  $J = 7.0$  Hz, 1H), 6.59 (d,  $J = 7.8$  Hz, 1H), 5.26 (s, 1H), 4.13 (q,  $J = 7.1$  Hz, 2H), 1.17 (t,  $J = 7.1$  Hz, 3H). <sup>13</sup>C{<sup>1</sup>H} NMR (75 MHz, CDCl<sub>3</sub>)  $\delta$  165.1, 140.2, 138.9, 137.0, 133.7, 133.4, 132.6, 130.9, 130.2, 129.7, 129.1, 128.8, 128.1, 126.5, 125.8, 121.3, 120.3, 119.3, 119.0, 112.6, 101.6, 60.4, 52.7, 14.2. HRMS (ESI) calcd for C<sub>24</sub>H<sub>21</sub>N<sub>2</sub>O<sub>4</sub>S<sup>+</sup>  $m/z$  433.1216 [M+H]<sup>+</sup>, found: 433.1226. HPLC (Chiralpak INA-H column, *n*-hexane/*i*-PrOH = 80/20, 25 °C,  $\lambda = 254$  nm, 1.0 mL/min):  $t_1 = 8.44$  min (major),  $t_2 = 13.50$  min (minor).

(*S*)-Benzyl-3-(5,5-dioxido-6,7-dihydrodibenzo[d,f][1,2]thiazepin-7-yl)indolizine-2-carboxylate (**3ac**): white solid (23.0 mg, 94% yield, 96% *ee*);  $R_f$  = 0.4 (petroleum ether/ethyl acetate, 3:1); mp: 91.7–92.3 °C.  $[\alpha]_D^{25} = +172.3$  ( $c = 1.0$ , CHCl<sub>3</sub>). <sup>1</sup>H NMR (300 MHz, CDCl<sub>3</sub>)  $\delta$  8.76 (d,  $J = 7.3$  Hz, 1H), 8.03 (d,  $J = 7.7$  Hz, 1H), 7.73 (t,  $J = 7.5$  Hz, 1H), 7.57 (dd,  $J = 12.5, 7.6$  Hz, 2H), 7.46 (d,  $J = 2.7$  Hz, 1H), 7.44 (s, 2H), 7.32 – 7.26 (m, 3H), 7.21 (dq,  $J = 6.8, 3.3, 2.7$  Hz, 3H), 6.95 (s, 1H), 6.90 (t,  $J = 3.4$  Hz, 1H), 6.88 – 6.81 (m, 1H), 6.68 (t,  $J = 7.0$  Hz, 1H), 6.60 (d,  $J = 7.8$  Hz, 1H), 5.30 (s, 1H), 5.13 (q,  $J = 12.6$  Hz, 2H). <sup>13</sup>C{<sup>1</sup>H} NMR (75 MHz, CDCl<sub>3</sub>)  $\delta$  164.8, 140.3, 138.9, 137.2, 136.0, 133.6, 133.4, 132.7, 130.8, 130.3, 129.6, 129.1, 128.7, 128.6, 128.1, 128.1, 127.8, 126.5, 125.7, 121.6, 120.4, 119.3, 117.7, 112.6, 101.8, 66.0, 52.9. HRMS (ESI) calcd for C<sub>29</sub>H<sub>23</sub>N<sub>2</sub>O<sub>4</sub>S<sup>+</sup>  $m/z$  495.1373 [M+H]<sup>+</sup>, found: 495.1383. HPLC (Chiralpak INA-H column,

*n*-hexane/*i*-PrOH = 80/20, 25 °C,  $\lambda$  = 254 nm, 1.0 mL/min)  $t_R$  = 12.50 min (major),  $t_R$  = 20.73 min (minor).

(*S*)-Butyl-3-(5,5-dioxido-6,7-dihydrodibenzo[d,f][1,2]thiazepin-7-yl)indolizine-2-carboxylate (**3ad**): white solid (22.3 mg, 97% yield, 99% *ee*);  $R_f$  = 0.5 (petroleum ether/ethyl acetate, 3:1); mp: 153.2–154.6 °C.  $[\alpha]_D^{25} = +250.1$  ( $c = 1.0$ , CHCl<sub>3</sub>). <sup>1</sup>H NMR (300 MHz, CDCl<sub>3</sub>)  $\delta$  8.74 (d,  $J = 7.2$  Hz, 1H), 8.03 (d,  $J = 7.6$  Hz, 1H), 7.77 (t,  $J = 7.5$  Hz, 1H), 7.66 (d,  $J = 7.4$  Hz, 1H), 7.58 (t,  $J = 7.5$  Hz, 1H), 7.45 (t,  $J = 6.6$  Hz, 3H), 7.20 (dt,  $J = 8.6, 4.4$  Hz, 1H), 6.88 (d,  $J = 11.4$  Hz, 3H), 6.68 (t,  $J = 6.8$  Hz, 1H), 6.59 (d,  $J = 7.7$  Hz, 1H), 5.37 (s, 1H), 4.06 (t,  $J = 6.5$  Hz, 2H), 1.51 (p,  $J = 6.8$  Hz, 2H), 1.28 (q,  $J = 7.5$  Hz, 2H), 0.87 (t,  $J = 7.3$  Hz, 3H). <sup>13</sup>C{<sup>1</sup>H} NMR (75 MHz, CDCl<sub>3</sub>):  $\delta$  165.1, 140.2, 138.9, 137.1, 133.6, 133.4, 132.7, 130.8, 130.2, 129.6, 129.1, 128.8, 128.1, 126.5, 125.7, 121.3, 120.2, 119.3, 118.1, 112.5, 101.7, 64.3, 52.8, 30.6, 19.2, 13.8. HRMS (ESI) calcd for C<sub>26</sub>H<sub>25</sub>N<sub>2</sub>O<sub>4</sub>S<sup>+</sup>  $m/z$  461.1529 [M+H]<sup>+</sup>, found: 461.1553. HPLC (Chiralpak INA-H column, *n*-hexane/*i*-PrOH = 80/20, 25 °C,  $\lambda$  = 254 nm, 1.0 mL/min):  $t_1$  = 8.00 min (major),  $t_2$  = 13.71 min (minor).

(*S*)-Tert-butyl-3-(5,5-dioxido-6,7-dihydrodibenzo[d,f][1,2]thiazepin-7-yl)indolizine-2-carboxylate (**3ae**): white solid (22.0 mg, 96% yield, 80% *ee*);  $R_f$  = 0.6 (petroleum ether/ethyl acetate, 3:1); mp: 197.0–198.1 °C.  $[\alpha]_D^{25} = +148.8$  ( $c = 1.0$ , CHCl<sub>3</sub>). <sup>1</sup>H NMR (300 MHz, CDCl<sub>3</sub>):  $\delta$  8.68 (d,  $J = 7.2$  Hz, 1H), 8.04 (d,  $J = 7.0$  Hz, 1H), 7.76 (t,  $J = 7.7$  Hz, 1H), 7.64 (d,  $J = 8.0$  Hz, 1H), 7.61–7.53 (m, 1H), 7.44 (d,  $J = 4.7$  Hz, 3H), 7.20 (dt,  $J = 8.7, 4.4$  Hz, 1H), 6.93 – 6.78 (m, 3H), 6.67 (d,  $J = 6.9$  Hz, 1H), 6.64 – 6.53 (m, 1H), 5.41 (s, 1H), 1.33 (s, 9H). <sup>13</sup>C{<sup>1</sup>H} NMR (75 MHz, CDCl<sub>3</sub>):  $\delta$  164.3, 140.2, 138.9, 137.3, 133.5, 133.2, 132.6, 131.0, 130.3, 129.6, 129.1, 128.7, 128.3, 126.5, 125.7, 120.5, 120.1, 120.0, 119.1, 112.3, 102.0, 80.9, 52.8, 28.2. HRMS (ESI) calcd for C<sub>26</sub>H<sub>25</sub>N<sub>2</sub>O<sub>4</sub>S<sup>+</sup>  $m/z$  461.1529 [M+H]<sup>+</sup>, found: 461.1551. HPLC (Chiralpak INA-H column, *n*-hexane/*i*-PrOH = 80/20, 25 °C,  $\lambda$  = 254 nm, 1.0 mL/min):  $t_1$  = 6.82 min (major),  $t_2$  = 8.62 min (minor).

(*S*)-Cyclohexyl-3-(5,5-dioxido-6,7-dihydrodibenzo[d,f][1,2]thiazepin-7-yl)indolizine-2-carboxylate (**3af**): pale yellow solid (23.3 mg, 96% yield, 86% *ee*);  $R_f$  = 0.5 (petroleum ether/ethyl acetate, 3:1); mp: 89.4–90.2 °C.  $[\alpha]_D^{25} = +112.2$  ( $c = 1.0$ , CHCl<sub>3</sub>). <sup>1</sup>H NMR (300 MHz, CDCl<sub>3</sub>)  $\delta$  8.72 (d,  $J = 7.1$  Hz, 1H), 8.06 (d,  $J = 7.8$  Hz, 1H), 7.76 (d,  $J = 7.7$  Hz, 1H), 7.67 (d,  $J = 7.7$  Hz, 1H), 7.61 (t,  $J = 7.7$  Hz, 1H), 7.50 – 7.41 (m, 3H), 7.24 – 7.16 (m, 1H), 6.95 – 6.81 (m, 3H), 6.67 (t,  $J = 7.1$  Hz, 1H), 6.60 (d,  $J = 7.9$  Hz, 1H), 5.26 (s, 1H), 4.79 (s, 1H), 1.59 (m, 5H), 1.28 (m, 5H). <sup>13</sup>C{<sup>1</sup>H} NMR (75 MHz, CDCl<sub>3</sub>)  $\delta$  164.5, 140.2, 138.6, 137.1, 133.6, 133.4, 132.6, 131.0, 130.2, 129.6, 129.1, 128.7, 128.2, 126.5, 125.8, 121.0, 120.2, 119.2, 118.7, 112.5, 101.7, 72.5, 52.8, 31.6, 29.7, 25.4, 23.7. HRMS (ESI) calcd for C<sub>28</sub>H<sub>27</sub>N<sub>2</sub>O<sub>4</sub>S<sup>+</sup>  $m/z$  487.1686 [M+H]<sup>+</sup>, found: 487.1664. HPLC (Chiralpak INA-H column, *n*-hexane/*i*-PrOH = 80/20, 25 °C,  $\lambda$  = 254 nm, 1.0 mL/min):  $t_1$  = 8.10 min (major),  $t_2$  = 13.14 min (minor).

(*S*)-2-methoxyethyl-3-(5,5-dioxido-6,7-dihydrodibenzo[d,f][1,2]thiazepin-7-yl)indolizine-2-carboxylate (**3ag**): brown solid (22.0 mg, 95% yield, 98% *ee*);  $R_f$  = 0.4 (petroleum ether/ethyl acetate, 3:1); mp: 119.7–120.2 °C.  $[\alpha]_D^{25} = +199.8$  ( $c = 1.0$ , CHCl<sub>3</sub>). <sup>1</sup>H NMR (300 MHz, CDCl<sub>3</sub>)  $\delta$  8.72 (d,  $J = 7.3$  Hz, 1H), 8.01 (d,  $J = 7.7$  Hz, 1H), 7.75 (d,  $J = 7.2$  Hz, 1H), 7.66 (d,  $J = 7.8$  Hz, 1H), 7.57 (t,  $J = 7.8$  Hz, 1H), 7.44 (t,  $J = 7.3$  Hz, 3H), 7.19 (dt,  $J = 8.5, 4.4$  Hz, 1H), 6.93 (d,  $J = 4.6$  Hz, 2H), 6.86 (t,  $J = 8.4$  Hz, 1H), 6.67 (t,  $J = 7.0$  Hz, 1H), 6.57 (d,  $J = 7.8$  Hz, 1H), 5.49 (s, 1H), 4.34 – 4.11 (m, 2H), 3.60 – 3.44 (m, 2H), 3.27 (s, 3H). <sup>13</sup>C{<sup>1</sup>H} NMR (75 MHz, CDCl<sub>3</sub>):  $\delta$  165.0, 140.3, 138.9, 137.2, 133.6, 133.3, 132.7, 130.9, 130.3, 129.6, 129.1, 128.8, 128.1, 126.4, 125.7,



121.7, 120.3, 119.3, 117.5, 112.6, 101.8, 70.4, 63.4, 59.0, 52.7. **HRMS** (ESI) calcd for  $C_{25}H_{23}N_2O_5S^+$   $m/z$  463.1322  $[M+H]^+$ , found: 463.1334. HPLC (Chiralpak INA-H column, *n*-hexane/*i*-PrOH = 80/20, 25 °C,  $\lambda$  = 254 nm, 1.0 mL/min):  $t_1$  = 10.08 min (major),  $t_2$  = 16.12 min (minor).

(*S*)-Methyl-3-(5,5-dioxido-6,7-dihydrodibenzo[d,f][1,2]thiazepin-7-yl)-8-fluoroindolizine-2-carboxylate (**3ah**): pale yellow solid (21.6 mg, 99% yield, 90% *ee*);  $R_f$  = 0.4 (petroleum ether/ethyl acetate, 4:1); mp: 124.7–125.4 °C.  $[\alpha]_D^{25} = +124.2$  ( $c = 0.5$ ,  $CHCl_3$ ).  **$^1H$  NMR** (300 MHz,  $CDCl_3$ )  $\delta$  8.58 (d,  $J = 6.9$  Hz, 1H), 8.04 (d,  $J = 7.9$  Hz, 1H), 7.79 (t,  $J = 7.5$  Hz, 1H), 7.68 (d,  $J = 7.6$  Hz, 1H), 7.60 (t,  $J = 7.6$  Hz, 1H), 7.46 (d,  $J = 4.5$  Hz, 2H), 7.31–7.21 (m, 1H), 7.07 (s, 1H), 6.93 (s, 1H), 6.58 (dt,  $J = 23.0, 6.4$  Hz, 3H), 5.30 (s, 1H), 3.71 (s, 3H).  **$^{13}C\{^1H\}$  NMR** (75 MHz,  $CDCl_3$ )  $\delta$  165.1, 154.7 (d,  $^1J_{C-F} = 249.0$  Hz), 140.3, 138.8, 137.0, 133.8, 132.3, 130.8, 130.3, 129.8, 129.0 (d,  $^2J_{C-F} = 20.3$  Hz), 127.9, 126.4, 125.9, 125.8, 123.8, 123.0, 117.7, 111.8 (d,  $^3J_{C-F} = 6.8$  Hz), 101.5 (d,  $^3J_{C-F} = 16.5$  Hz), 99.2, 52.6, 51.7.  **$^{19}F$  NMR** (376 MHz,  $CDCl_3$ )  $\delta$  -124.41. **HRMS** (ESI) calcd for  $C_{23}H_{18}FN_2O_4S^+$   $m/z$  436.0965  $[M+H]^+$ , found: 437.0983. HPLC (Chiralpak INA-H column, *n*-hexane/*i*-PrOH = 80/20, 25 °C,  $\lambda$  = 254 nm, 1.0 mL/min):  $t_1$  = 6.93 min (major),  $t_2$  = 10.44 min (minor).

(*S*)-Methyl-7-chloro-3-(5,5-dioxido-6,7-dihydrodibenzo[d,f][1,2]thiazepin-7-yl)indolizine-2-carboxylate (**3ai**): pale yellow solid (21.5 mg, 95% yield, 94% *ee*);  $R_f$  = 0.5 (petroleum ether/ethyl acetate, 4:1); mp: 114.5–115.3 °C.  $[\alpha]_D^{25} = +60.4$  ( $c = 0.5$ ,  $CHCl_3$ ).  **$^1H$  NMR** (300 MHz,  $CDCl_3$ )  $\delta$  8.70 (d,  $J = 7.8$  Hz, 1H), 8.03 (d,  $J = 7.8$  Hz, 1H), 7.78 (t,  $J = 7.1$  Hz, 1H), 7.67 (d,  $J = 7.7$  Hz, 1H), 7.64 – 7.56 (m, 1H), 7.54 – 7.36 (m, 3H), 7.25 – 7.17 (m, 1H), 6.90 (d,  $J = 3.6$  Hz, 1H), 6.83 (s, 1H), 6.65 (d,  $J = 5.4$  Hz, 1H), 6.52 (d,  $J = 7.8$  Hz, 1H), 5.28 (s, 1H), 3.69 (s, 3H).  **$^{13}C\{^1H\}$  NMR** (75 MHz,  $CDCl_3$ )  $\delta$  165.1, 140.3, 138.8, 137.0, 133.8, 133.1, 132.3, 130.8, 130.4, 129.8, 129.1, 128.8, 127.8, 127.2, 126.0, 125.8, 122.4, 118.6, 118.5, 114.2, 101.3, 52.6, 51.7. **HRMS** (ESI) calcd for  $C_{23}H_{17}ClN_2O_4SNa^+$   $m/z$  475.0489  $[M+Na]^+$ , found: 475.0507( $^{35}Cl$ ), 477.0472( $^{37}Cl$ ). HPLC (Chiralpak INA-H column, *n*-hexane/*i*-PrOH = 80/20, 25 °C,  $\lambda$  = 254 nm, 1.0 mL/min):  $t_1$  = 7.98 min (major),  $t_2$  = 9.20 min (minor).

(*S*)-Methyl-3-(5,5-dioxido-6,7-dihydrodibenzo[d,f][1,2]thiazepin-7-yl)-6-fluoroindolizine-2-carboxylate (**3aj**): pale yellow solid (21.5 mg, 99% yield, 95% *ee*);  $R_f$  = 0.4 (petroleum ether/ethyl acetate, 4:1); mp: 157.6–158.6 °C.  $[\alpha]_D^{25} = +175.40$  ( $c = 1.0$ ,  $CHCl_3$ ).  **$^1H$  NMR** (300 MHz,  $CDCl_3$ )  $\delta$  8.72 (d,  $J = 5.4$  Hz, 1H), 8.04 (d,  $J = 7.8$  Hz, 1H), 7.79 (t,  $J = 7.6$  Hz, 1H), 7.68 (d,  $J = 7.7$  Hz, 1H), 7.60 (t,  $J = 7.7$  Hz, 1H), 7.46 (q,  $J = 5.2$  Hz, 3H), 7.26–7.18 (m, 1H), 6.95 (s, 1H), 6.89 (d,  $J = 3.6$  Hz, 1H), 6.85 (d,  $J = 8.7$  Hz, 1H), 6.55 (d,  $J = 7.9$  Hz, 1H), 5.29 (s, 1H), 3.69 (s, 3H).  **$^{13}C\{^1H\}$  NMR** (75 MHz,  $CDCl_3$ )  $\delta$  165.1, 153.1 (d,  $^1J_{C-F} = 237.0$  Hz), 140.3, 138.9, 137.1, 133.8, 132.2, 131.2, 130.8, 130.3, 129.8, 129.2, 128.8, 127.8, 125.8, 123.1, 121.1 (d,  $^3J_{C-F} = 9.0$  Hz), 118.3, 113.0, 112.6 (d,  $^2J_{C-F} = 26.25$  Hz), 103.0, 52.7, 51.6.  **$^{19}F$  NMR** (376 MHz,  $CDCl_3$ )  $\delta$  -136.72. **HRMS** (ESI) calcd for  $C_{23}H_{17}FN_2O_4SK^+$   $m/z$  475.0524  $[M+K]^+$ , found: 475.0516. HPLC (Chiralpak INA-H column, *n*-hexane/*i*-PrOH = 70/30, 25 °C,  $\lambda$  = 254 nm, 1.0 mL/min):  $t_1$  = 6.62 min (major),  $t_2$  = 8.01 min (minor).

(*S*)-Methyl-6-chloro-3-(5,5-dioxido-6,7-dihydrodibenzo[d,f][1,2]thiazepin-7-yl)indolizine-2-carboxylate (**3ak**): pale yellow solid (22.4 mg, 99% yield, 94% *ee*);  $R_f$  = 0.4 (petroleum ether/ethyl acetate, 4:1); mp: 142.8–143.6 °C.  $[\alpha]_D^{25} = +153.6$  ( $c = 0.5$ ,  $CHCl_3$ ).  **$^1H$  NMR** (300 MHz,  $CDCl_3$ )  $\delta$  8.69 (d,  $J = 7.6$  Hz, 1H), 8.02 (d,  $J = 7.8$  Hz, 1H), 7.77 (d,  $J = 7.9$  Hz, 1H), 7.67 (d,  $J = 7.5$  Hz, 1H), 7.63 – 7.55 (m, 1H), 7.50 – 7.39 (m, 3H), 7.21 (s, 1H), 6.97 – 6.86 (m, 1H), 6.82 (s, 1H),

6.65 (d,  $J = 7.6$  Hz, 1H), 6.51 (d,  $J = 7.8$  Hz, 1H), 5.32 (s, 1H), 3.69 (s, 3H).  $^{13}\text{C}\{^1\text{H}\}$  NMR (75 MHz,  $\text{CDCl}_3$ )  $\delta$  165.2, 140.3, 138.8, 137.0, 133.8, 133.1, 132.3, 130.8, 130.4, 129.8, 129.2, 128.9, 127.8, 127.2, 126.0, 125.8, 122.4, 118.6, 118.4, 114.2, 101.3, 52.6, 51.7. HRMS (ESI) calcd for  $\text{C}_{23}\text{H}_{17}\text{ClN}_2\text{O}_4\text{SNa}^+$   $m/z$  475.0489  $[\text{M}+\text{Na}]^+$ , found: 475.0487( $^{35}\text{Cl}$ ), 477.0476( $^{37}\text{Cl}$ ). HPLC (Chiralpak INA-H column,  $n$ -hexane/ $i$ -PrOH = 80/20, 25 °C,  $\lambda = 254$  nm, 1.0 mL/min):  $t_1 = 9.49$  min (major),  $t_2 = 14.61$  min (minor).

(*S*)-Methyl-6-bromo-3-(5,5-dioxido-6,7-dihydrodibenzo[d,f][1,2]thiazepin-7-yl)indolizine-2-carboxylate (**3al**): pale yellow solid (24.6 mg, 99% yield, 90% *ee*);  $R_f = 0.5$  (petroleum ether/ethyl acetate, 4:1); mp: 169.5–170.9 °C.  $[\alpha]_{\text{D}}^{25} = +161.6$  ( $c = 1.0$ ,  $\text{CHCl}_3$ ).  $^1\text{H}$  NMR (300 MHz,  $\text{CDCl}_3$ )  $\delta$  8.93 (s, 1H), 8.06 (d,  $J = 7.8$  Hz, 1H), 7.79 (t,  $J = 7.7$  Hz, 1H), 7.68 (d,  $J = 7.7$  Hz, 1H), 7.61 (t,  $J = 7.6$  Hz, 1H), 7.54 – 7.41 (m, 3H), 7.37 (d,  $J = 9.5$  Hz, 1H), 6.94 (d,  $J = 9.6$  Hz, 2H), 6.88 (d,  $J = 3.5$  Hz, 1H), 6.55 (d,  $J = 7.8$  Hz, 1H), 5.27 (s, 1H), 3.69 (s, 3H).  $^{13}\text{C}\{^1\text{H}\}$  NMR (75 MHz,  $\text{CDCl}_3$ )  $\delta$  165.1, 140.5, 138.9, 137.0, 133.8, 132.4, 131.6, 130.8, 130.3, 129.8, 129.3, 128.8, 127.7, 125.9, 125.8, 123.1, 122.3, 120.9, 118.0, 108.1, 103.0, 52.7, 51.7. HRMS (ESI) calcd for  $\text{C}_{23}\text{H}_{18}\text{BrN}_2\text{O}_4\text{S}^+$   $m/z$  497.0165  $[\text{M}+\text{H}]^+$ , found: 497.0186( $^{79}\text{Br}$ ), 499.0176( $^{81}\text{Br}$ ). HPLC (Chiralpak INA-H column,  $n$ -hexane/ $i$ -PrOH = 70/30, 25 °C,  $\lambda = 254$  nm, 1.0 mL/min):  $t_{\text{R}} = 6.83$  min (major),  $t_1 = 10.37$  min (minor).

(*S*)-Methyl-3-(5,5-dioxido-6,7-dihydrodibenzo[d,f][1,2]thiazepin-7-yl)-6-methylindolizine-2-carboxylate (**3am**): pale yellow solid (21.4 mg, 99% yield, 95% *ee*);  $R_f = 0.5$  (petroleum ether/ethyl acetate, 4:1); mp: 173.3–174.6 °C.  $[\alpha]_{\text{D}}^{25} = +175.40$  ( $c = 0.5$ ,  $\text{CHCl}_3$ ).  $^1\text{H}$  NMR (300 MHz,  $\text{CDCl}_3$ )  $\delta$  8.53 (s, 1H), 8.04 (d,  $J = 7.6$  Hz, 1H), 7.77 (d,  $J = 7.6$  Hz, 1H), 7.68 (d,  $J = 7.7$  Hz, 1H), 7.59 (t,  $J = 7.6$  Hz, 1H), 7.45 (d,  $J = 4.1$  Hz, 2H), 7.38 (d,  $J = 9.1$  Hz, 1H), 7.25–7.20 (m, 1H), 6.90 (d,  $J = 3.4$  Hz, 1H), 6.84 (s, 1H), 6.74 (d,  $J = 9.2$  Hz, 1H), 6.60 (d,  $J = 7.8$  Hz, 1H), 5.28 (s, 1H), 3.68 (s, 3H), 2.27 (s, 3H).  $^{13}\text{C}\{^1\text{H}\}$  NMR (75 MHz,  $\text{CDCl}_3$ )  $\delta$  165.6, 140.3, 139.0, 137.2, 133.7, 132.8, 132.3, 130.8, 130.1, 129.6, 129.1, 128.7, 128.1, 125.6, 123.5, 122.8, 122.2, 121.2, 119.7, 117.1, 101.3, 52.7, 51.5, 19.1. HRMS (ESI) calcd for  $\text{C}_{24}\text{H}_{21}\text{N}_2\text{O}_4\text{S}^+$   $m/z$  433.1216  $[\text{M}+\text{H}]^+$ , found: 433.1234. HPLC (Chiralpak INA-H column,  $n$ -hexane/ $i$ -PrOH = 70/30, 25 °C,  $\lambda = 254$  nm, 1.0 mL/min):  $t_{\text{R}} = 6.30$  min (major),  $t_{\text{R}} = 10.63$  min (minor).

(*S*)-Methyl-3-(9-fluoro-5,5-dioxido-6,7-dihydrodibenzo[d,f][1,2]thiazepin-7-yl)indolizine-2-carboxylate (**3ba**): pale yellow solid (20.5 mg, 94% yield, 98% *ee*);  $R_f = 0.5$  (petroleum ether/ethyl acetate, 4:1); mp: 156.2–157.8 °C.  $[\alpha]_{\text{D}}^{25} = +177.6$  ( $c = 0.5$ ,  $\text{CHCl}_3$ ).  $^1\text{H}$  NMR (300 MHz,  $\text{CDCl}_3$ )  $\delta$  8.72 (d,  $J = 7.0$  Hz, 1H), 8.03 (d,  $J = 7.8$  Hz, 1H), 7.78 (t,  $J = 7.6$  Hz, 1H), 7.62 (dd,  $J = 18.3$ , 7.5 Hz, 2H), 7.47 (d,  $J = 9.3$  Hz, 1H), 7.45 – 7.37 (m, 1H), 7.15 (d,  $J = 7.8$  Hz, 1H), 6.89 (q,  $J = 7.2$ , 6.1 Hz, 3H), 6.72 (t,  $J = 7.1$  Hz, 1H), 6.29 (d,  $J = 9.5$  Hz, 1H), 5.30 (s, 1H), 3.70 (s, 3H).  $^{13}\text{C}\{^1\text{H}\}$  NMR (75 MHz,  $\text{CDCl}_3$ )  $\delta$  165.5, 163.0 (d,  $^1J_{\text{C-F}} = 247.5$  Hz), 138.0, 137.0, 136.3, 135.2, 133.8, 133.6, 131.9 (d,  $^3J_{\text{C-F}} = 7.5$  Hz), 130.7, 128.9, 126.1, 125.9, 120.8, 120.5, 119.5, 117.7, 116.5 (d,  $^2J_{\text{C-F}} = 21.0$  Hz), 115.7 (d,  $^2J_{\text{C-F}} = 24.0$  Hz), 113.0, 101.6, 52.4, 51.6.  $^{19}\text{F}$  NMR (376 MHz,  $\text{CDCl}_3$ )  $\delta$  -111.94. HRMS (ESI) calcd for  $\text{C}_{23}\text{H}_{17}\text{FN}_2\text{O}_4\text{SNa}^+$   $m/z$  459.0785  $[\text{M}+\text{H}]^+$ , found: 459.0776. HPLC (Chiralpak INA-H column,  $n$ -hexane/ $i$ -PrOH = 80/20, 25 °C,  $\lambda = 254$  nm, 1.0 mL/min):  $t_1 = 8.43$  min (major),  $t_2 = 11.36$  min (minor).

(*S*)-Methyl-3-(9-chloro-5,5-dioxido-6,7-dihydrodibenzo[d,f][1,2]thiazepin-7-yl)indolizine-2-carboxylate (**3ca**): white solid (22.3 mg, 99% yield, 98% *ee*);  $R_f = 0.4$  (petroleum ether/ethyl acetate, 4:1); mp: 157.9–159.6 °C.  $[\alpha]_{\text{D}}^{25} = +208.8$  ( $c = 0.5$ ,  $\text{CHCl}_3$ ).  $^1\text{H}$  NMR (300 MHz,  $\text{CDCl}_3$ )  $\delta$  8.71 (d,  $J = 7.0$  Hz, 1H), 8.03 (d,  $J = 7.6$  Hz, 1H), 7.78 (t,  $J = 7.1$  Hz, 1H), 7.71 – 7.56 (m, 2H), 7.48 (d,

$J = 9.4$  Hz, 1H), 7.40 (d,  $J = 9.0$  Hz, 2H), 6.88 (d,  $J = 6.3$  Hz, 3H), 6.73 (t,  $J = 7.1$  Hz, 1H), 6.53 (s, 1H), 5.29 (s, 1H), 3.70 (s, 3H).  $^{13}\text{C}\{^1\text{H}\}$  NMR (75 MHz,  $\text{CDCl}_3$ )  $\delta$  165.5, 138.8, 137.8, 137.0, 135.2, 134.6, 133.8, 133.6, 131.4, 130.6, 129.8, 129.1, 128.3, 126.0, 125.9, 120.6, 120.5, 119.6, 117.8, 113.0, 101.7, 52.4, 51.6. HRMS (ESI) calcd for  $\text{C}_{23}\text{H}_{17}\text{ClN}_2\text{O}_4\text{SNa}^+$   $m/z$  475.0489  $[\text{M}+\text{Na}]^+$ , found: 475.0502 ( $^{35}\text{Cl}$ ), 477.0486 ( $^{37}\text{Cl}$ ). HPLC (Chiralpak ND-H column, *n*-hexane/*i*-PrOH = 70/30, 25 °C,  $\lambda = 254$  nm, 1.0 mL/min):  $t_1 = 10.81$  min (major),  $t_2 = 14.85$  min (minor).

(*S*)-Methyl-3-(9-methoxy-5,5-dioxido-6,7-dihydrodibenzo[d,f][1,2]thiazepin-7-yl)indolizine-2-carboxylate (**3da**): white solid (22.8 mg, 99% yield, 99% *ee*);  $R_f = 0.4$  (petroleum ether/ethyl acetate, 4:1); mp: 103.0–104.7 °C.  $[\alpha]_{\text{D}}^{25} = +203.6$  ( $c = 0.5$ ,  $\text{CHCl}_3$ ).  $^1\text{H}$  NMR (300 MHz,  $\text{CDCl}_3$ )  $\delta$  8.75 (d,  $J = 7.2$  Hz, 1H), 8.01 (d,  $J = 8.3$  Hz, 1H), 7.80 – 7.69 (m, 1H), 7.63 (d,  $J = 7.9$  Hz, 1H), 7.55 (d,  $J = 7.7$  Hz, 1H), 7.44 (d,  $J = 9.1$  Hz, 1H), 7.37 (d,  $J = 8.6$  Hz, 1H), 7.02 – 6.80 (m, 4H), 6.70 (d,  $J = 6.5$  Hz, 1H), 6.14 (d,  $J = 3.1$  Hz, 1H), 5.30 (s, 1H), 3.69 (s, 3H), 3.60 (s, 3H).  $^{13}\text{C}\{^1\text{H}\}$  NMR (75 MHz,  $\text{CDCl}_3$ )  $\delta$  165.5, 160.0, 138.8, 136.9, 134.1, 133.7, 133.4, 132.5, 131.5, 130.6, 128.2, 126.4, 125.8, 121.6, 120.3, 119.4, 117.6, 115.4, 113.5, 112.6, 101.5, 55.2, 52.7, 51.5. HRMS (ESI) calcd for  $\text{C}_{24}\text{H}_{21}\text{N}_2\text{O}_5\text{S}^+$   $m/z$  449.1165  $[\text{M}+\text{H}]^+$ , found: 449.1173. HPLC (Chiralpak ND-H column, *n*-hexane/*i*-PrOH = 70/30, 25 °C,  $\lambda = 230$  nm, 1.0 mL/min):  $t_1 = 8.53$  min (major),  $t_2 = 17.00$  min (minor). To determine the absolute configuration of **3da** (99% *ee*), it (20.0 mg) was first dissolved in dichloromethane (1.0 mL) and filtered with a microporous membrane before being added to a 5.0 mL vial. Then, *n*-hexane (2.5 mL) was slowly added dropwise in the solution of **3da**. It was slowly volatilized at room temperature, a single crystal of **3da** was obtained after 3–4 days.

(*S*)-Methyl-3-(9-(benzyloxy)-5,5-dioxido-6,7-dihydrodibenzo[d,f][1,2]thiazepin-7-yl)indolizine-2-carboxylate (**3ea**): white solid (26.0 mg, 99% yield, 99% *ee*);  $R_f = 0.5$  (petroleum ether/ethyl acetate, 4:1); mp: 117.1–118.6 °C.  $[\alpha]_{\text{D}}^{25} = +105.4$  ( $c = 0.5$ ,  $\text{CHCl}_3$ ).  $^1\text{H}$  NMR (300 MHz,  $\text{CDCl}_3$ )  $\delta$  8.73 (d,  $J = 7.3$  Hz, 1H), 8.00 (d,  $J = 7.7$  Hz, 1H), 7.73 (t,  $J = 7.6$  Hz, 1H), 7.62 (d,  $J = 7.7$  Hz, 1H), 7.54 (d,  $J = 7.7$  Hz, 1H), 7.44 (d,  $J = 9.0$  Hz, 1H), 7.35 (d,  $J = 8.6$  Hz, 1H), 7.26 (d,  $J = 9.5$  Hz, 3H), 7.21 – 7.12 (m, 2H), 7.01 (d,  $J = 5.7$  Hz, 1H), 6.93 – 6.76 (m, 3H), 6.66 (t,  $J = 6.9$  Hz, 1H), 6.21 (s, 1H), 5.26 (s, 1H), 4.97 – 4.62 (m, 2H), 3.67 (s, 3H).  $^{13}\text{C}\{^1\text{H}\}$  NMR (75 MHz,  $\text{CDCl}_3$ )  $\delta$  165.5, 159.3, 138.8, 136.9, 136.2, 134.1, 133.7, 133.4, 132.6, 131.5, 130.6, 128.6, 128.2, 128.1, 127.6, 126.3, 125.8, 121.5, 120.3, 119.4, 117.6, 115.6, 115.0, 112.7, 101.6, 70.1, 52.7, 51.5. HRMS (ESI) calcd for  $\text{C}_{30}\text{H}_{25}\text{N}_2\text{O}_5\text{S}^+$   $m/z$  525.1478  $[\text{M}+\text{H}]^+$ , found: 525.1498. HPLC (Chiralpak INC-H column, *n*-hexane/*i*-PrOH = 70/30, 25 °C,  $\lambda = 254$  nm, 1.0 mL/min):  $t_1 = 20.71$  min (major),  $t_2 = 22.79$  min (minor).

(*S*)-Methyl-3-(10-fluoro-5,5-dioxido-6,7-dihydrodibenzo[d,f][1,2]thiazepin-7-yl)indolizine-2-carboxylate (**3fa**): white solid (20.5 mg, 95% yield, 98% *ee*);  $R_f = 0.5$  (petroleum ether/ethyl acetate, 4:1); mp: 147.6–148.5 °C.  $[\alpha]_{\text{D}}^{25} = +206.6$  ( $c = 1.0$ ,  $\text{CHCl}_3$ ).  $^1\text{H}$  NMR (300 MHz,  $\text{CDCl}_3$ )  $\delta$  8.72 (d,  $J = 9.0$  Hz, 1H), 8.05 (d,  $J = 7.8$  Hz, 1H), 7.79 (d,  $J = 7.9$  Hz, 1H), 7.71 – 7.60 (m, 2H), 7.47 (d,  $J = 9.1$  Hz, 1H), 7.17 (d,  $J = 9.1$  Hz, 1H), 6.88 (t,  $J = 7.2$  Hz, 4H), 6.70 (t,  $J = 7.1$  Hz, 1H), 6.54 (t,  $J = 7.2$  Hz, 1H), 5.26 (s, 1H), 3.70 (s, 3H).  $^{13}\text{C}\{^1\text{H}\}$  NMR (75 MHz,  $\text{CDCl}_3$ )  $\delta$  165.5, 163.1 (d,  $^1J_{\text{C-F}} = 247.5$  Hz), 142.5 (d,  $^3J_{\text{C-F}} = 8.3$  Hz), 137.7, 137.1, 133.9, 133.5, 130.6, 130.0 (d,  $^3J_{\text{C-F}} = 8.3$  Hz), 129.3, 128.6, 126.2, 125.9, 121.3, 120.4, 119.4, 117.5 (d,  $^3J_{\text{C-F}} = 6.8$  Hz), 117.2, 115.6 (d,  $^2J_{\text{C-F}} = 21.0$  Hz), 112.8, 101.5, 52.1, 51.6.  $^{19}\text{F}$  NMR (376 MHz,  $\text{CDCl}_3$ )  $\delta$  -112.11. HRMS (ESI) calcd for  $\text{C}_{23}\text{H}_{18}\text{FN}_2\text{O}_4\text{S}^+$   $m/z$  437.0965  $[\text{M}+\text{H}]^+$ , found: 437.0971. HPLC (Chiralpak INA-H

column, *n*-hexane/*i*-PrOH = 70/30, 25 °C,  $\lambda$  = 254 nm, 1.0 mL/min):  $t_1$  = 8.43 min (major),  $t_2$  = 11.36 min (minor).

(*S*)-Methyl-3-(10-chloro-5,5-dioxido-6,7-dihydrodibenzo[d,f][1,2]thiazepin-7-yl)indolizine-2-carboxylate (**3ga**): white solid (21.4 mg, 95% yield, 98% *ee*);  $R_f$  = 0.5 (petroleum ether/ethyl acetate, 4:1); mp: 221.1–222.1 °C.  $[\alpha]_D^{25} = +273.6$  ( $c = 0.5$ , CHCl<sub>3</sub>).  $^1\text{H NMR}$  (300 MHz, CDCl<sub>3</sub>)  $\delta$  8.71 (d,  $J = 7.4$  Hz, 1H), 8.05 (d,  $J = 7.8$  Hz, 1H), 7.85 – 7.75 (m, 1H), 7.65 (dd,  $J = 17.9, 7.5$  Hz, 2H), 7.53 – 7.41 (m, 2H), 7.16 (dd,  $J = 8.4, 2.2$  Hz, 1H), 6.87 (d,  $J = 7.0$  Hz, 3H), 6.70 (t,  $J = 6.6$  Hz, 1H), 6.49 (d,  $J = 8.4$  Hz, 1H), 5.28 (s, 1H), 3.70 (s, 3H).  $^{13}\text{C}\{^1\text{H}\}$  NMR (75 MHz, CDCl<sub>3</sub>)  $\delta$  165.5, 141.9, 137.5, 137.0, 135.5, 133.9, 133.5, 131.2, 130.7, 130.1, 129.5, 129.4, 129.0, 126.2, 125.9, 121.0, 120.4, 119.5, 117.6, 112.9, 101.5, 52.1, 51.7. HRMS (ESI) calcd for C<sub>23</sub>H<sub>17</sub>ClN<sub>2</sub>O<sub>4</sub>SNa<sup>+</sup>  $m/z$  475.0489 [M+Na]<sup>+</sup>, found: 475.0496(<sup>35</sup>Cl), 477.0476(<sup>37</sup>Cl). HPLC (Chiralpak INA-H column, *n*-hexane/*i*-PrOH = 70/30, 25 °C,  $\lambda$  = 254 nm, 1.0 mL/min):  $t_1$  = 6.21 min (major),  $t_2$  = 8.94 min (minor).

(*S*)-Methyl-3-(10-methoxy-5,5-dioxido-6,7-dihydrodibenzo[d,f][1,2]thiazepin-7-yl)indolizine-2-carboxylate (**3ha**): white solid (22.7 mg, 99% yield, 95% *ee*);  $R_f$  = 0.5 (petroleum ether/ethyl acetate, 4:1); mp: 139.7–141.2 °C.  $[\alpha]_D^{25} = +199.4$  ( $c = 0.5$ , CHCl<sub>3</sub>).  $^1\text{H NMR}$  (300 MHz, CDCl<sub>3</sub>)  $\delta$  8.75 (d,  $J = 7.3$  Hz, 1H), 8.03 (d,  $J = 7.4$  Hz, 1H), 7.77 (t,  $J = 7.5$  Hz, 1H), 7.68 (d,  $J = 7.9$  Hz, 1H), 7.60 (d,  $J = 7.8$  Hz, 1H), 7.45 (d,  $J = 9.1$  Hz, 1H), 6.98 (s, 1H), 6.86 (s, 3H), 6.70 (d,  $J = 9.2$  Hz, 2H), 6.47 (d,  $J = 8.8$  Hz, 1H), 5.27 (s, 1H), 3.80 (s, 3H), 3.69 (s, 3H).  $^{13}\text{C}\{^1\text{H}\}$  NMR (75 MHz, CDCl<sub>3</sub>)  $\delta$  165.5, 160.2, 141.6, 138.8, 137.1, 133.7, 133.3, 130.7, 129.3, 128.9, 126.5, 125.8, 124.5, 122.0, 120.3, 119.3, 117.4, 116.3, 113.6, 112.5, 101.4, 55.4, 52.2, 51.5. HRMS (ESI) calcd for C<sub>24</sub>H<sub>21</sub>N<sub>2</sub>O<sub>5</sub>S<sup>+</sup>  $m/z$  449.1167 [M+H]<sup>+</sup>, found: 449.1152. HPLC (Chiralpak INA-H column, *n*-hexane/*i*-PrOH = 70/30, 25 °C,  $\lambda$  = 254 nm, 1.0 mL/min):  $t_1$  = 7.86 min (major),  $t_2$  = 13.35 min (minor).

(*S*)-Methyl-3-(2-fluoro-5,5-dioxido-6,7-dihydrodibenzo[d,f][1,2]thiazepin-7-yl)indolizine-2-carboxylate (**3ia**): white solid (21.5 mg, 98% yield, 98% *ee*);  $R_f$  = 0.4 (petroleum ether/ethyl acetate, 4:1); mp: 151.9–152.7 °C.  $[\alpha]_D^{25} = +252.2$  ( $c = 0.5$ , CHCl<sub>3</sub>).  $^1\text{H NMR}$  (300 MHz, CDCl<sub>3</sub>)  $\delta$  8.71 (d,  $J = 7.3$  Hz, 1H), 8.04 (dd,  $J = 8.7, 5.3$  Hz, 1H), 7.51 – 7.41 (m, 3H), 7.38 (dd,  $J = 9.1, 2.6$  Hz, 1H), 7.26 – 7.17 (m, 2H), 6.95 (d,  $J = 3.3$  Hz, 1H), 6.88 (q,  $J = 6.0$  Hz, 2H), 6.69 (t,  $J = 6.8$  Hz, 1H), 6.59 (d,  $J = 7.8$  Hz, 1H), 5.33 (s, 1H), 3.71 (s, 3H).  $^{13}\text{C}\{^1\text{H}\}$  NMR (75 MHz, CDCl<sub>3</sub>)  $\delta$  165.6, 165.5 (d,  $^1J_{\text{C-F}} = 253.5$  Hz), 141.8, 139.2, 133.4, 133.3, 132.6, 130.1, 129.7 (d,  $^3J_{\text{C-F}} = 8.3$  Hz), 128.6 (d,  $^3J_{\text{C-F}} = 9.8$  Hz), 128.2, 126.3, 121.4, 120.4, 119.4, 118.1, 117.8, 117.6, 115.7 (d,  $^2J_{\text{C-F}} = 21.8$  Hz), 112.7, 101.5, 52.6, 51.6.  $^{19}\text{F NMR}$  (376 MHz, CDCl<sub>3</sub>)  $\delta$  -104.18. HRMS (ESI) calcd for C<sub>23</sub>H<sub>17</sub>FN<sub>2</sub>O<sub>4</sub>SK<sup>+</sup>  $m/z$  475.0524 [M+K]<sup>+</sup>, found: 475.0523. HPLC (Chiralpak INA-H column, *n*-hexane/*i*-PrOH = 70/30, 25 °C,  $\lambda$  = 254 nm, 1.0 mL/min):  $t_1$  = 6.02 min (major),  $t_2$  = 7.55 min (minor).

(*S*)-Methyl-3-(9,10-dimethoxy-5,5-dioxido-6,7-dihydrodibenzo[d,f][1,2]thiazepin-7-yl)indolizine-2-carboxylate (**3ja**): white solid (22.5 mg, 94% yield, 86% *ee*);  $R_f$  = 0.5 (petroleum ether/ethyl acetate, 4:1); mp: 121.6–122.2 °C.  $[\alpha]_D^{25} = +132.4$  ( $c = 0.5$ , CHCl<sub>3</sub>).  $^1\text{H NMR}$  (300 MHz, CDCl<sub>3</sub>)  $\delta$  8.79 (d,  $J = 8.0$  Hz, 1H), 8.04 (d,  $J = 7.7$  Hz, 1H), 7.76 (t,  $J = 7.1$  Hz, 1H), 7.66 (d,  $J = 7.8$  Hz, 1H), 7.62 – 7.52 (m, 1H), 7.45 (d,  $J = 8.9$  Hz, 1H), 6.91 (d,  $J = 13.3$  Hz, 4H), 6.70 (d,  $J = 7.0$  Hz, 1H), 6.03 (s, 1H), 5.32 (s, 1H), 3.90 (s, 3H), 3.70 (s, 3H), 3.39 (s, 3H).  $^{13}\text{C}\{^1\text{H}\}$  NMR (75 MHz, CDCl<sub>3</sub>)  $\delta$  165.5, 149.6, 149.1, 139.0, 137.2, 133.6, 133.3, 132.7, 130.5, 128.3, 126.4, 125.9, 124.8, 122.0, 120.3, 119.3, 117.6, 113.2, 112.5, 111.5, 101.6, 56.1, 55.6, 52.3, 51.6. HRMS (ESI) calcd

for  $C_{25}H_{23}N_2O_6S^+$   $m/z$  479.1271  $[M+H]^+$ , found: 479.1283. HPLC (Chiralpak INA-H column, *n*-hexane/*i*-PrOH = 70/30, 25 °C,  $\lambda$  = 254 nm, 1.0 mL/min):  $t_1$  = 6.21 min (major),  $t_2$  = 8.37 min (minor).

**Scale-up reaction:** Indolizine **2a** (301.0 mg, 1.2 mmol, 1.2 equiv.), **C8** (56.6 mg, 0.1 mmol, 10 mol%) and EtOAc (20 mL) were added in an oven-dried 50 mL round-bottomed flask. It was allowed to stir in air at 0 °C for 10 min, then seven-membered cyclic N-sulfonylimine **1a** (243.0 mg, 1.0 mmol, 1.0 equiv.) was added and the mixture was stirred at 0 °C for 36 h. The solvent was removed and the residue was directly purified by flash column chromatography on silica gel (petroleum ether/ethyl acetate, 6/1) to afford the product **3aa** (415.0 mg, >99% yield, 98% *ee*) as a white solid.

**Synthetic transformations:** CH<sub>3</sub>I or allyl-bromide (0.5mmol, 5.0 equiv.) and K<sub>2</sub>CO<sub>3</sub> (0.2 mmol, 2.0 equiv.) was added to the solution of **3aa** (0.1 mmol, 41.8 mg) in CH<sub>3</sub>CN (2.0 mL). The mixture was stirred for 8 h. Then the mixture was diluted with EtOAc (20 mL) and washed with brine (10 mL). The organic layer was dried (Na<sub>2</sub>SO<sub>4</sub>), filtered through a short pad of silica gel, and concentrated in vacuo. Purification of the residue by column chromatography to gave products **4aa** and **4ab**.

(*S*)-Methyl-3-(6-methyl-5,5-dioxido-6,7-dihydrodibenzo[d,f][1,2]thiazepin-7-yl)indolizine-2-carboxylate (**4aa**): white solid (42.1 mg, 97% yield, 99% *ee*);  $R_f$  = 0.5 (petroleum ether/ethyl acetate, 6:1); mp: 163.0–164.3 °C.  $[\alpha]_D^{25}$  = +183.1 ( $c$  = 1.0, CHCl<sub>3</sub>). <sup>1</sup>H NMR (300 MHz, CDCl<sub>3</sub>)  $\delta$  8.79 (d,  $J$  = 7.3 Hz, 1H), 8.00 (d,  $J$  = 7.7 Hz, 1H), 7.77 (d,  $J$  = 7.4 Hz, 1H), 7.71 (d,  $J$  = 7.9 Hz, 1H), 7.59 (t,  $J$  = 7.8 Hz, 1H), 7.49 (d,  $J$  = 9.3 Hz, 1H), 7.41 (d,  $J$  = 3.9 Hz, 2H), 7.14 (q,  $J$  = 4.1 Hz, 1H), 6.92 (s, 1H), 6.86 (d,  $J$  = 9.0 Hz, 1H), 6.69 (t,  $J$  = 6.9 Hz, 1H), 6.47 (d,  $J$  = 7.8 Hz, 1H), 6.36 (d,  $J$  = 2.9 Hz, 1H), 3.73 (s, 3H), 2.55 (s, 3H). <sup>13</sup>C{<sup>1</sup>H} NMR (75 MHz, CDCl<sub>3</sub>)  $\delta$  165.6, 140.4, 139.3, 134.6, 134.3, 133.1, 133.1, 130.7, 130.1, 129.2, 128.9, 128.4, 127.8, 127.2, 126.2, 122.1, 120.2, 119.3, 118.2, 112.8, 101.3, 60.2, 51.5, 38.0. HRMS (ESI) calcd for  $C_{24}H_{21}N_2O_4S^+$   $m/z$  433.1216  $[M+H]^+$ , found: 433.1234. HPLC (Chiralpak INA-H column, *n*-hexane/*i*-PrOH = 95/5, 25 °C,  $\lambda$  = 230 nm, 1.0 mL/min):  $t_1$  = 11.67 min (major),  $t_2$  = 12.81 min (minor).

(*S*)-Methyl-3-(6-allyl-5,5-dioxido-6,7-dihydrodibenzo[d,f][1,2]thiazepin-7-yl)indolizine-2-carboxylate (**4ab**): white solid (44.9 mg, 98% yield, 97% *ee*);  $R_f$  = 0.5 (petroleum ether/ethyl acetate, 6:1); mp: 65.0–66.2 °C.  $[\alpha]_D^{25}$  = +145.3 ( $c$  = 1.0, CHCl<sub>3</sub>). <sup>1</sup>H NMR (300 MHz, CDCl<sub>3</sub>)  $\delta$  8.73 (d,  $J$  = 7.2 Hz, 1H), 8.00 (d,  $J$  = 7.8 Hz, 1H), 7.72 (q,  $J$  = 7.7 Hz, 2H), 7.58 (t,  $J$  = 7.5 Hz, 1H), 7.49 (d,  $J$  = 9.0 Hz, 1H), 7.40 (d,  $J$  = 3.7 Hz, 2H), 7.20 – 7.10 (m, 1H), 6.92 (s, 1H), 6.86 (d,  $J$  = 8.7 Hz, 1H), 6.67 (d,  $J$  = 7.0 Hz, 2H), 6.50 (d,  $J$  = 7.9 Hz, 1H), 5.45 – 5.25 (m, 1H), 4.74 (d,  $J$  = 10.2 Hz, 1H), 4.62 (d,  $J$  = 17.0 Hz, 1H), 3.86 (dd,  $J$  = 15.7, 6.7 Hz, 1H), 3.72 (s, 3H), 3.28 (dd,  $J$  = 15.8, 6.8 Hz, 1H). <sup>13</sup>C{<sup>1</sup>H} NMR (75 MHz, CDCl<sub>3</sub>)  $\delta$  165.6, 140.3, 138.9, 137.3, 134.4, 133.6, 133.0, 131.0, 130.5, 130.3, 129.2, 129.0, 128.6, 128.0, 126.4, 126.1, 121.8, 120.2, 119.3, 119.1, 118.3, 112.8, 101.3, 57.5, 54.0, 51.5. HRMS (ESI) calcd for  $C_{26}H_{23}N_2O_4S^+$   $m/z$  459.1373  $[M+H]^+$ , found: 459.1382. HPLC (Chiralpak INA-H column, *n*-hexane/*i*-PrOH = 95/5, 25 °C,  $\lambda$  = 254 nm, 1.0 mL/min):  $t_1$  = 11.39 min (major),  $t_2$  = 13.10 min (minor).

To a stirred solution of **4aa** (0.1 mmol, 43.2 mg) in dry THF (3.0 mL) under a N<sub>2</sub> atmosphere was added LiAlH<sub>4</sub> (0.2 mL, 1 M in THF, 0.2 mmol, 2.0 equiv.) via syringe at 0°C. The resultant reaction mixture was stirred 2 h, then it was cooled with ice bath. The mixture was diluted with EtOAc (10 mL) and acidified with aq. 2 M HCl until the aqueous layer became clear. The aqueous layer was separated and extracted with EtOAc (2×15 mL). The combined organic layers were

dried (Na<sub>2</sub>SO<sub>4</sub>), filtered, and concentrated in vacuo. Purification of the residue by flash chromatography to afforded compound **4ac**.

(*S*)-7-(2-(hydroxymethyl)-indolizin-3-yl)-6-methyl-6,7-dihydrodibenzo[d,f][1,2]thiazepine-5,5-dioxide (**4ac**): blue solid (40.0 mg, 98% yield, 96% *ee*); *R*<sub>f</sub> = 0.3 (petroleum ether/ethyl acetate, 2:1); mp: 208.9–209.9 °C. [ $\alpha$ ]<sub>D</sub><sup>25</sup> = +240.0 (c = 1.0, CHCl<sub>3</sub>). <sup>1</sup>H NMR (300 MHz, CDCl<sub>3</sub>)  $\delta$  8.69 (d, *J* = 7.0 Hz, 1H), 8.01 (d, *J* = 7.8 Hz, 1H), 7.79 (t, *J* = 7.7 Hz, 1H), 7.68 (d, *J* = 7.8 Hz, 1H), 7.60 (t, *J* = 7.7 Hz, 1H), 7.42 (t, *J* = 7.5 Hz, 3H), 7.16 (dt, *J* = 8.7, 4.5 Hz, 1H), 7.00 – 6.20 (m, 5H), 5.25 (s, 1H), 4.54 (s, 2H), 2.55 (s, 3H). <sup>13</sup>C{<sup>1</sup>H} NMR (75 MHz, CDCl<sub>3</sub>)  $\delta$  140.1, 139.1, 135.1, 134.3, 133.8, 133.6, 130.5, 129.9, 129.3, 129.1, 128.6, 128.2, 127.3, 125.7, 119.0, 118.2, 115.8, 111.2, 98.9, 60.9, 57.9, 37.9. HRMS (ESI) calcd for C<sub>23</sub>H<sub>21</sub>N<sub>2</sub>O<sub>3</sub>S<sup>+</sup> *m/z* 405.1250 [M+H]<sup>+</sup>, found: 405.1270. HPLC (Chiralpak INA-H column, *n*-hexane/*i*-PrOH = 70/30, 25 °C,  $\lambda$  = 254 nm, 1.0 mL/min): *t*<sub>1</sub> = 6.60 min (major), *t*<sub>2</sub> = 7.47 min (minor).

To a flame-dried 10 mL Schlenk tube with a stirring bar was added **4aa** (43.2 mg, 0.1 mmol) and NaOH (20 mg, 0.5 mmol, 5.0 equiv.) in 5 mL of mixed solvent (THF/MeOH/H<sub>2</sub>O=2/2/1). It was allowed refluxing for 6 h, when the solution was cooled to room temperature, adjusted the pH with 1 M HCl and extracted three times with EtOAc. The organic layer was dried (Na<sub>2</sub>SO<sub>4</sub>), concentrated in vacuo, and purified by column chromatography to gave product **4ad**.

(*S*)-3-(6-methyl-5,5-dioxido-6,7-dihydrodibenzo[d,f][1,2]thiazepin-7-yl)indolizine-2-carboxylic acid (**4ad**): gray solid (39.5 mg, 94% yield, 97% *ee*); *R*<sub>f</sub> = 0.6 (dichloromethane/ methanol, 20:1); mp: 233.1–233.8 °C. [ $\alpha$ ]<sub>D</sub><sup>25</sup> = + 230.0 (c = 1.0, CHCl<sub>3</sub>). <sup>1</sup>H NMR (300 MHz, CDCl<sub>3</sub>)  $\delta$  8.77 (d, *J* = 7.4 Hz, 1H), 8.00 (d, *J* = 7.8 Hz, 1H), 7.79 (t, *J* = 7.5 Hz, 1H), 7.68 (d, *J* = 7.7 Hz, 1H), 7.61 (t, *J* = 7.6 Hz, 1H), 7.48 (d, *J* = 9.2 Hz, 1H), 7.41 (d, *J* = 4.4 Hz, 2H), 7.15 (dd, *J* = 8.1, 4.4 Hz, 1H), 6.95 (s, 1H), 6.88 (t, *J* = 7.9 Hz, 1H), 6.69 (t, *J* = 6.9 Hz, 1H), 6.43 (d, *J* = 7.9 Hz, 1H), 6.21 (s, 1H), 2.52 (s, 3H). <sup>13</sup>C{<sup>1</sup>H} NMR (75 MHz, CDCl<sub>3</sub>)  $\delta$  170.1, 140.3, 139.1, 134.3, 134.3, 133.8, 133.2, 130.6, 130.2, 129.3, 129.0, 128.5, 127.7, 127.3, 126.2, 122.6, 120.4, 119.5, 117.4, 113.2, 102.1, 60.3, 38.0. HRMS (ESI) calcd for C<sub>23</sub>H<sub>18</sub>N<sub>2</sub>O<sub>4</sub>S<sup>+</sup> *m/z* 419.1060 [M+H]<sup>+</sup>, found: 419.1069. HPLC (Chiralpak INB-H column, *n*-hexane/*i*-PrOH = 50/50, 25 °C,  $\lambda$  = 254 nm, 1.0 mL/min): *t*<sub>1</sub> = 5.53 min (major), *t*<sub>2</sub> = 7.04 min (minor).

To a flame-dried 10 mL Schlenk tube with a stirring bar was added **4aa** (43.2 mg, 0.1 mmol) in 2.0 mL DMSO. Then, thiophenol (2.0 equiv.), potassium iodide (2.0 equiv.) and tert-butyl hydroperoxide (2.0 equiv.) were sequentially added. The vial was tightly sealed, and reaction was heated to 60 °C for 24 h. After cooling to room temperature, distilled water was added (20 mL) and the aqueous phase extracted with EtOAc. The organic layer was dried (Na<sub>2</sub>SO<sub>4</sub>), concentrated, and purified by column chromatography gave product **4ae**.

(*S*)-Methyl-3-(6-methyl-5,5-dioxido-6,7-dihydrodibenzo[d,f][1,2]thiazepin-7-yl)-1-(phenylthio)indolizine-2-carboxylate (**4ae**): yellow solid (45.0 mg, 83% yield, 99% *ee*); *R*<sub>f</sub> = 0.5 (petroleum ether/ethyl acetate, 6:1); mp: 76.8–77.6 °C. [ $\alpha$ ]<sub>D</sub><sup>25</sup> = +144.1 (c = 1.0, CHCl<sub>3</sub>). <sup>1</sup>H NMR (300 MHz, CDCl<sub>3</sub>)  $\delta$  8.77 (d, *J* = 7.3 Hz, 1H), 8.00 (d, *J* = 7.7 Hz, 1H), 7.84 – 7.66 (m, 3H), 7.59 (t, *J* = 7.5 Hz, 1H), 7.45 (dd, *J* = 21.9, 6.7 Hz, 4H), 7.15 (dt, *J* = 8.5, 4.6 Hz, 2H), 7.04 (q, *J* = 7.6, 7.2 Hz, 1H), 6.96 – 6.83 (m, 2H), 6.68 (t, *J* = 6.9 Hz, 1H), 6.46 (d, *J* = 7.9 Hz, 1H), 6.34 (s, 1H), 3.73 (s, 3H), 2.54 (s, 3H). <sup>13</sup>C{<sup>1</sup>H} NMR (75 MHz, CDCl<sub>3</sub>)  $\delta$  165.6, 140.4, 139.2, 134.6, 134.3, 133.8, 133.1, 130.6, 130.1, 129.2, 128.9, 128.7, 128.4, 127.8, 127.3, 126.2, 122.1, 120.2, 119.3, 118.1, 112.8, 101.3, 60.2, 51.5, 38.0. HRMS (ESI) calcd for C<sub>30</sub>H<sub>25</sub>N<sub>2</sub>O<sub>4</sub>S<sub>2</sub><sup>+</sup> *m/z* 541.1250 [M+H]<sup>+</sup>, found: 541.1267. HPLC (Chiralpak INA-H column, *n*-hexane/*i*-PrOH = 70/30, 25 °C,  $\lambda$  = 254 nm,

1.0 mL/min):  $t_1 = 5.15$  min (major),  $t_2 = 6.21$  min (minor).

An oven-dried 10 mL vial equipped with a magnetic stir bar was charged with **4ab** (20.0 mg, 0.044 mmol) and methyl acrylate (7.6 mg, 0.088 mmol). To this vessel, a solution of Hoveyda-Grubbs II (5 mol%) in  $\text{CH}_2\text{Cl}_2$  (1.0 mL) were added. The resulting solution was stirred for 12 h at room temperature. The reaction media were then concentrated under vacuum and purified by column chromatography to give product **4af**.

Methyl-(*S,E*)-3-(6-(4-methoxy-4-oxobut-2-en-1-yl)-5,5-dioxido-6,7-dihydrodibenzo[d,f][1,2]thiazepin-7-yl)indolizine-2-carboxylate (**4af**): yellow solid (16.0 mg, 72% yield, 97% *ee*);  $R_f = 0.3$  (petroleum ether/ethyl acetate, 4:1); mp: 83.4–84.2 °C.  $[\alpha]_D^{25} = +86.0$  ( $c = 0.5$ ,  $\text{CHCl}_3$ ).  $^1\text{H NMR}$  (300 MHz,  $\text{CDCl}_3$ )  $\delta$  8.67 (d,  $J = 7.4$  Hz, 1H), 7.99 (d,  $J = 7.8$  Hz, 1H), 7.78 (t,  $J = 7.5$  Hz, 1H), 7.70 (d,  $J = 7.7$  Hz, 1H), 7.59 (t,  $J = 7.6$  Hz, 1H), 7.54 – 7.36 (m, 3H), 7.23 – 7.10 (m, 1H), 7.05 – 6.81 (m, 2H), 6.71 (t,  $J = 6.9$  Hz, 1H), 6.63 (s, 1H), 6.53 (d,  $J = 7.9$  Hz, 1H), 6.40 – 6.14 (m, 1H), 5.24 (d,  $J = 15.6$  Hz, 1H), 3.85 – 3.77 (m, 1H), 3.73 (s, 3H), 3.69 – 3.63 (m, 1H), 3.57 (s, 3H).  $^{13}\text{C}\{^1\text{H}\}$  NMR (75 MHz,  $\text{CDCl}_3$ )  $\delta$  165.6, 141.2, 140.3, 138.9, 136.6, 133.9, 133.8, 133.2, 130.8, 130.4, 129.3, 129.0, 128.7, 128.0, 126.4, 125.9, 123.0, 121.3, 120.2, 119.4, 118.4, 113.0, 101.6, 58.8, 52.3, 51.5, 51.4. HRMS (ESI) calcd for  $\text{C}_{28}\text{H}_{25}\text{N}_2\text{O}_6\text{S}^+$   $m/z$  517.1427  $[\text{M}+\text{H}]^+$ , found: 517.1443. HPLC (Chiralpak INA-H column, *n*-hexane/*i*-PrOH = 80/20, 25 °C,  $\lambda = 254$  nm, 1.0 mL/min):  $t_1 = 8.23$  min (major),  $t_2 = 10.40$  min (minor).

(*S*)-Methyl-3-(2,2-dioxido-3,4-dihydrobenzo[e][1,2,3]oxathiazin-4-yl)indolizine-2-carboxylate (**6a**): white solid (32.2 mg, 90% yield, 84% *ee*);  $R_f = 0.5$  (petroleum ether/ethyl acetate, 4:1); mp: 158.6–159.7 °C.  $[\alpha]_D^{25} = -112.8$  ( $c = 1.0$ ,  $\text{CHCl}_3$ ).  $^1\text{H NMR}$  (300 MHz,  $\text{CDCl}_3$ )  $\delta$  8.06 (s, 1H), 7.78 – 7.61 (m, 1H), 7.49 (d,  $J = 9.1$  Hz, 1H), 7.29 (s, 1H), 7.08 (d,  $J = 8.2$  Hz, 1H), 6.96 (d,  $J = 8.7$  Hz, 2H), 6.84 (d,  $J = 8.2$  Hz, 1H), 6.76 (s, 1H), 6.49 (s, 1H), 6.35 (s, 1H), 3.76 (s, 3H).  $^{13}\text{C}\{^1\text{H}\}$  NMR (75 MHz,  $\text{CDCl}_3$ )  $\delta$  166.7, 151.4, 132.7, 129.8, 125.8, 125.2, 121.7, 120.9, 119.2, 118.6, 114.1, 103.1, 52.3. HPLC (Chiralpak INA-H column, *n*-hexane/*i*-PrOH = 70/30, 25 °C,  $\lambda = 254$  nm, 1.0 mL/min):  $t_1 = 6.67$  min (major),  $t_2 = 9.32$  min (minor).

(*S*)-Ethyl-3-(2,2-dioxido-3,4-dihydrobenzo[e][1,2,3]oxathiazin-4-yl)indolizine-2-carboxylate (**6b**): white solid (31.3 mg, 84% yield, 65% *ee*);  $R_f = 0.5$  (petroleum ether/ethyl acetate, 4:1); mp: 159.4–161.3 °C.  $[\alpha]_D^{25} = -102.9$  ( $c = 1.0$ ,  $\text{CHCl}_3$ ).  $^1\text{H NMR}$  (300 MHz,  $\text{CDCl}_3$ )  $\delta$  8.01 (s, 1H), 7.67 (s, 1H), 7.44 (d,  $J = 9.0$  Hz, 1H), 7.22 (d,  $J = 7.6$  Hz, 1H), 7.02 (d,  $J = 8.3$  Hz, 1H), 6.96 – 6.88 (m, 2H), 6.80 (t,  $J = 7.8$  Hz, 1H), 6.70 (s, 1H), 6.44 (s, 1H), 6.32 (s, 1H), 4.23 – 4.10 (m, 2H), 1.21 (t,  $J = 7.4$  Hz, 3H).  $^{13}\text{C}\{^1\text{H}\}$  NMR (75 MHz,  $\text{CDCl}_3$ )  $\delta$  166.2, 151.4, 132.7, 129.8, 125.8, 125.1, 121.7, 120.9, 119.2, 118.6, 114.0, 103.2, 61.4, 52.3, 14.1. (Chiralpak INA-H column, *n*-hexane/*i*-PrOH = 70/30, 25 °C,  $\lambda = 254$  nm, 1.0 mL/min):  $t_1 = 6.41$  min (major),  $t_2 = 8.91$  min (minor).

(*S*)-Benzyl-3-(2,2-dioxido-3,4-dihydrobenzo[e][1,2,3]oxathiazin-4-yl)indolizine-2-carboxylate (**6c**): Brown solid (33.0 mg, 74% yield, 99% *ee*);  $R_f = 0.5$  (petroleum ether/ethyl acetate, 4:1); mp: 168.9–169.4 °C.  $[\alpha]_D^{25} = -109.2$  ( $c = 1.0$ ,  $\text{CHCl}_3$ ).  $^1\text{H NMR}$  (300 MHz,  $\text{CDCl}_3$ )  $\delta$  8.12 (s, 1H), 7.68 (s, 1H), 7.52 (d,  $J = 9.1$  Hz, 1H), 7.47 – 7.23 (m, 6H), 7.13 (d,  $J = 8.3$  Hz, 1H), 7.07 (s, 1H), 6.99 (t,  $J = 7.7$  Hz, 1H), 6.90 (t,  $J = 7.7$  Hz, 1H), 6.80 (s, 1H), 6.56 (s, 1H), 6.41 (s, 1H), 5.24 (s, 2H).  $^{13}\text{C}\{^1\text{H}\}$  NMR (75 MHz,  $\text{CDCl}_3$ )  $\delta$  166.2, 151.5, 135.5, 132.7, 129.8, 128.7, 128.4, 128.2, 125.8, 125.1, 121.7, 120.9, 119.3, 118.6, 114.1, 103.3, 66.9, 52.3. HPLC (Chiralpak INA-H column, *n*-hexane/*i*-PrOH = 70/30, 25 °C,  $\lambda = 254$  nm, 1.0 mL/min):  $t_1 = 8.04$  min (major),  $t_2 = 11.34$  min (minor).

(*S*)-Butyl-3-(2,2-dioxido-3,4-dihydrobenzo[*e*][1,2,3]oxathiazin-4-yl)indolizine-2-carboxylate (**6d**): white solid (29.6 mg, 74% yield, 61% *ee*);  $R_f = 0.5$  (petroleum ether/ethyl acetate, 4:1); mp: 127.5–129.7°C.  $[\alpha]_D^{25} = -83.7$  ( $c = 1.0$ ,  $\text{CHCl}_3$ ).  $^1\text{H NMR}$  (300 MHz,  $\text{CDCl}_3$ )  $\delta$  8.02 (s, 1H), 7.72 (s, 1H), 7.43 (d,  $J = 9.0$  Hz, 1H), 7.22 (d,  $J = 8.8$  Hz, 1H), 7.03 (d,  $J = 8.4$  Hz, 1H), 6.91 (d,  $J = 10.1$  Hz, 2H), 6.80 (t,  $J = 7.8$  Hz, 1H), 6.71 (s, 1H), 6.43 (s, 1H), 6.30 (s, 1H), 4.11 (s, 2H), 1.62 – 1.53 (m, 2H), 1.38 – 1.24 (m, 2H), 0.86 (t,  $J = 7.3$  Hz, 3H).  $^{13}\text{C}\{^1\text{H}\}$  NMR (75 MHz,  $\text{CDCl}_3$ )  $\delta$  166.4, 151.4, 132.6, 129.8, 125.8, 125.1, 121.7, 120.9, 119.2, 118.6, 114.0, 103.1, 65.2, 52.3, 30.6, 19.1, 13.7. HPLC (Chiralpak INA-H column, *n*-hexane/*i*-PrOH = 70/30, 25 °C,  $\lambda = 254$  nm, 1.0 mL/min):  $t_1 = 5.920$  min (major),  $t_2 = 7.58$  min (minor).

(*S*)-Tert-butyl-3-(2,2-dioxido-3,4-dihydrobenzo[*e*][1,2,3]oxathiazin-4-yl)indolizine-2-carboxylate (**6e**): white solid (33.0 mg, 83% yield, 63% *ee*);  $R_f = 0.5$  (petroleum ether/ethyl acetate, 4:1); mp: 163.2–164.7°C.  $[\alpha]_D^{25} = -89.2$  ( $c = 1.0$ ,  $\text{CHCl}_3$ ).  $^1\text{H NMR}$  (300 MHz,  $\text{CDCl}_3$ )  $\delta$  8.07 (s, 1H), 7.64 (s, 1H), 7.47 (d,  $J = 9.0$  Hz, 1H), 7.28 (s, 1H), 7.07 (d,  $J = 8.2$  Hz, 1H), 7.00 – 6.87 (m, 2H), 6.84 (t,  $J = 7.8$  Hz, 1H), 6.74 (s, 1H), 6.58 – 6.25 (m, 2H), 1.39 (s, 9H).  $^{13}\text{C}\{^1\text{H}\}$  NMR (75 MHz,  $\text{CDCl}_3$ )  $\delta$  151.56, 132.5, 129.7, 126.0, 124.9, 121.7, 120.8, 119.0, 118.4, 113.7, 103.0, 82.3, 52.3, 28.0. HPLC (Chiralpak INC-H column, *n*-hexane/*i*-PrOH = 90/10, 25 °C,  $\lambda = 254$  nm, 1.0 mL/min):  $t_1 = 18.75$  min (minor),  $t_2 = 22.00$  min (major).

## 5. X-ray structure for compound 3da

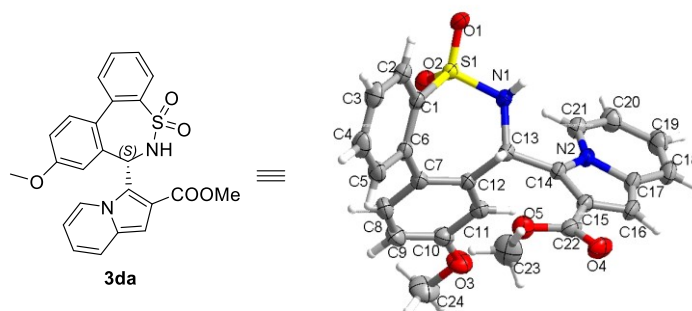

The single crystal of the compound **3da** (CCDC: 2320870) was grown from its solution in dichloromethane and hexane, and one of them is suitable for X-ray diffraction analysis. The correctness of the X-ray data and the structure had been checked by using the Check CIF utility on the submission Web site: <http://checkcif.iucr.org>.



## 6. Copy of NMR

### 3aa, <sup>1</sup>H-NMR in CDCl<sub>3</sub>

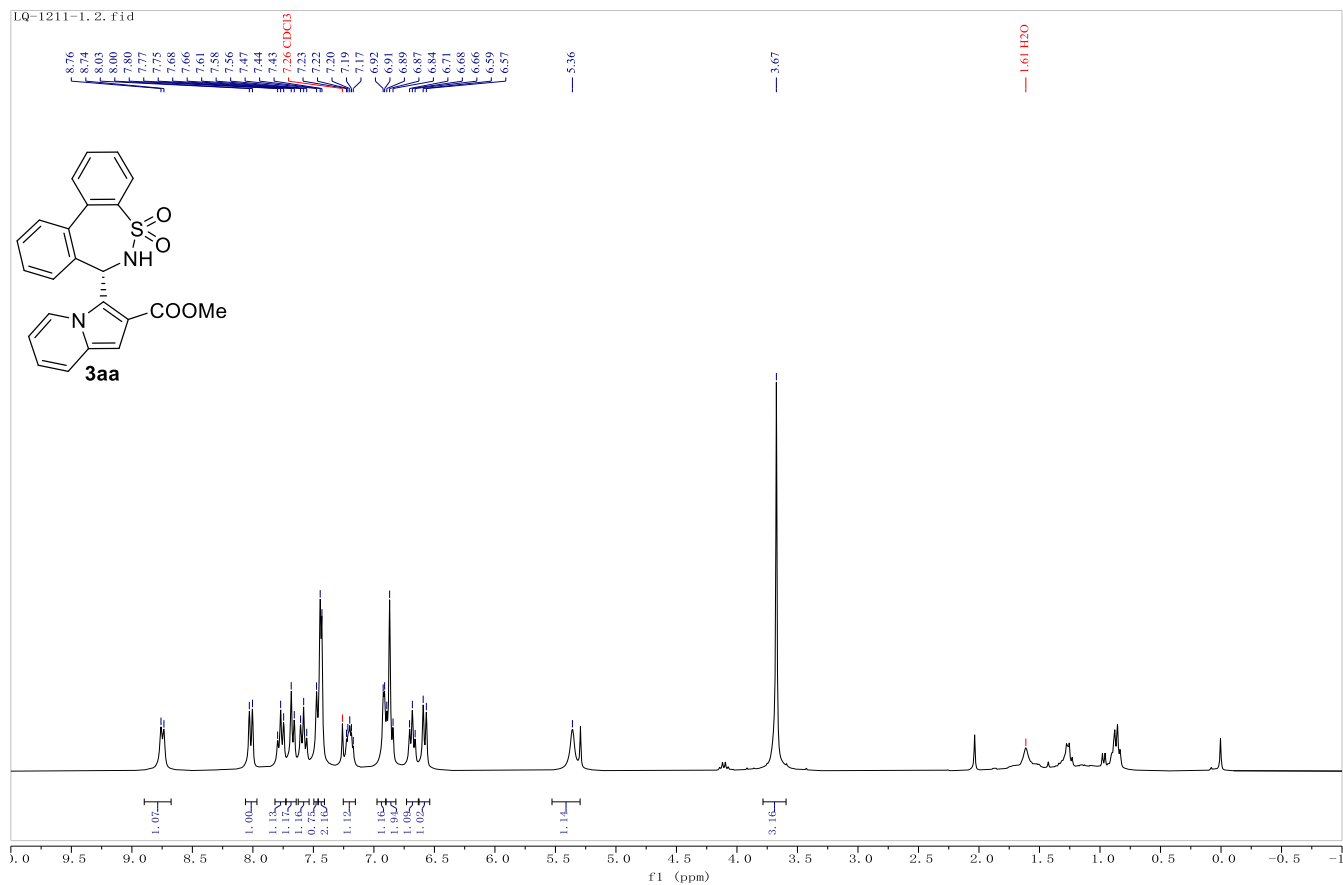

### 3aa, <sup>13</sup>C-NMR in CDCl<sub>3</sub>

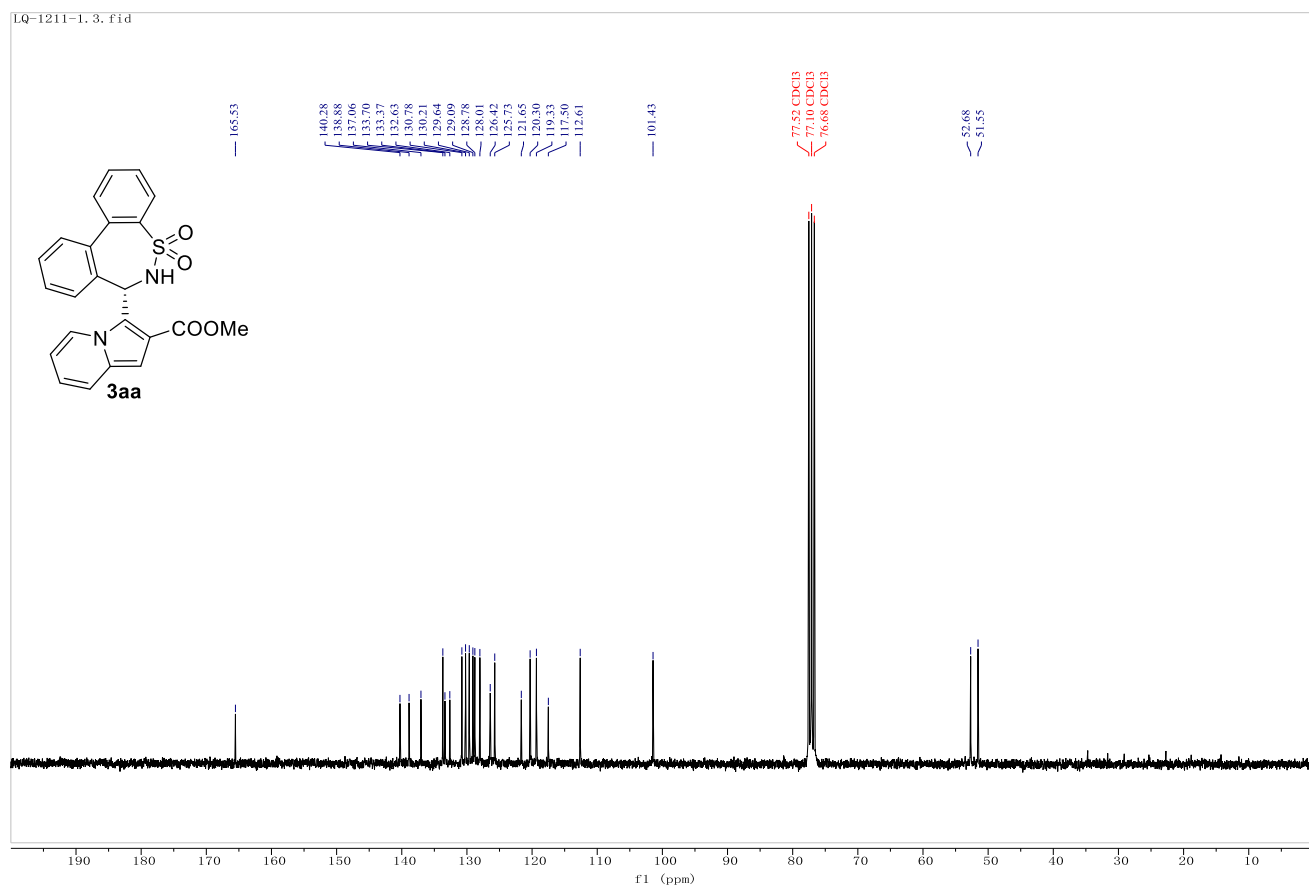

### 3ab, <sup>1</sup>H-NMR in CDCl<sub>3</sub>

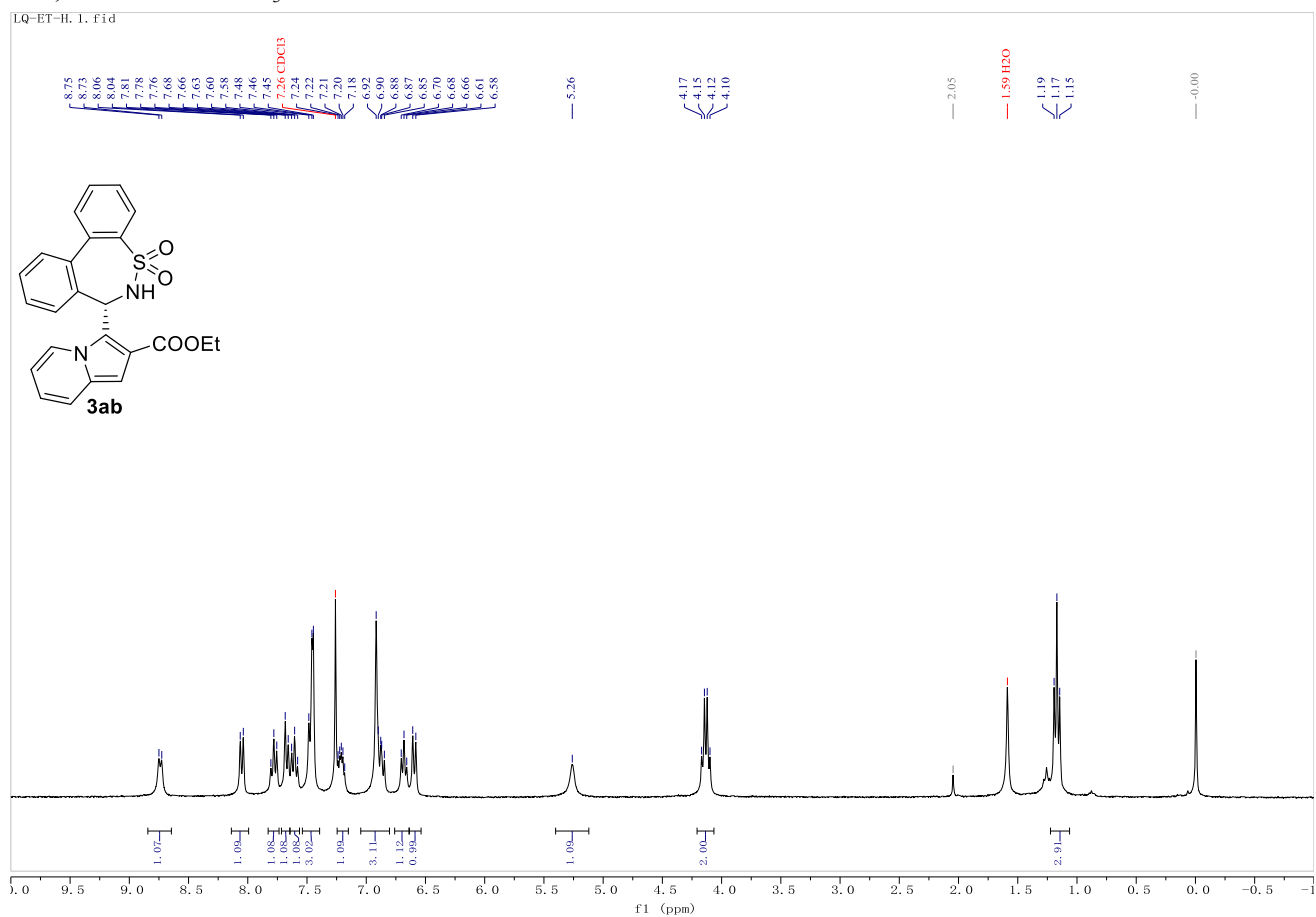

### 3ab, <sup>13</sup>C-NMR in CDCl<sub>3</sub>

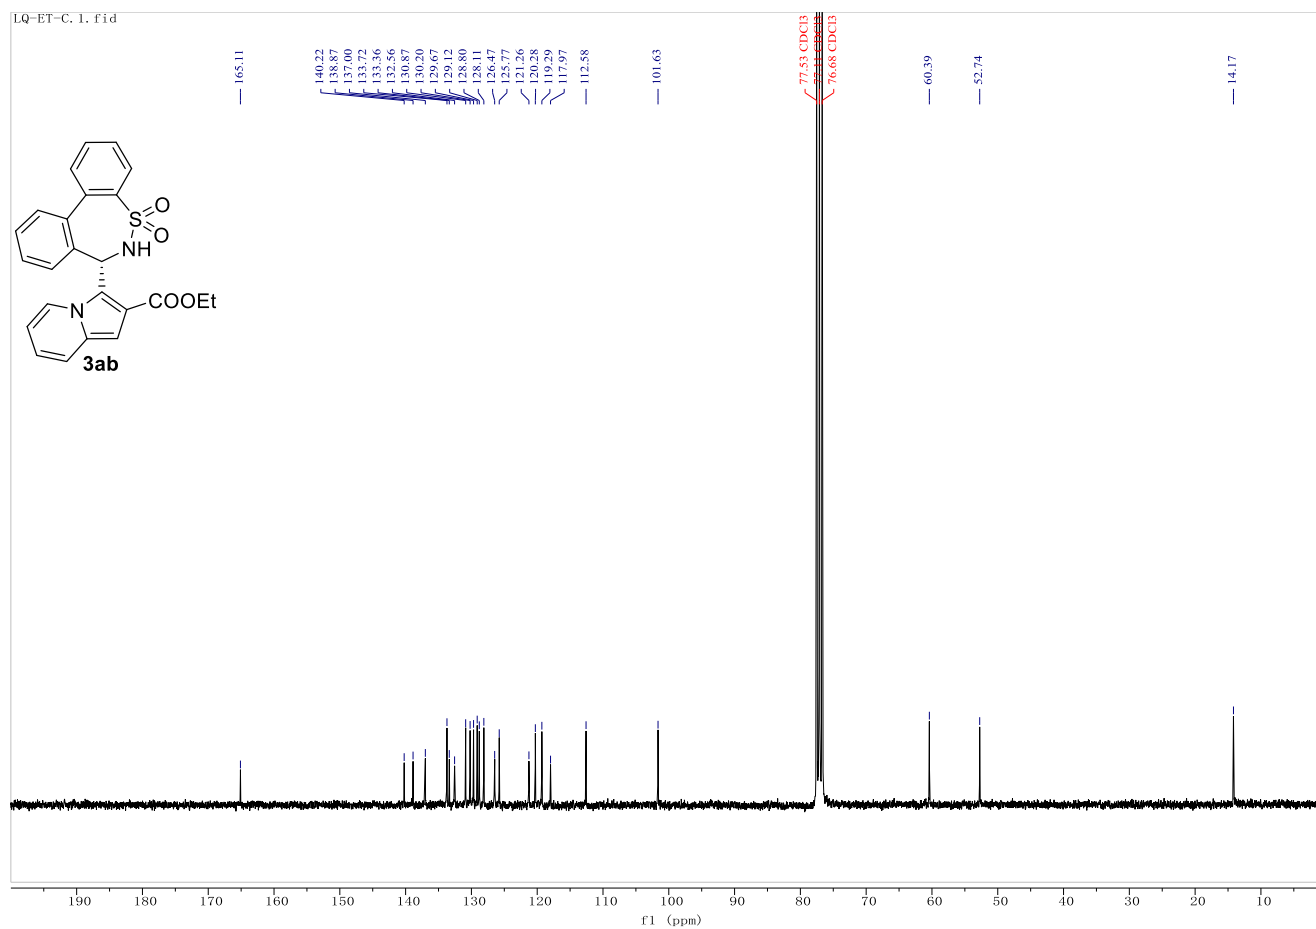

**3ac**,  $^1\text{H-NMR}$  in  $\text{CDCl}_3$

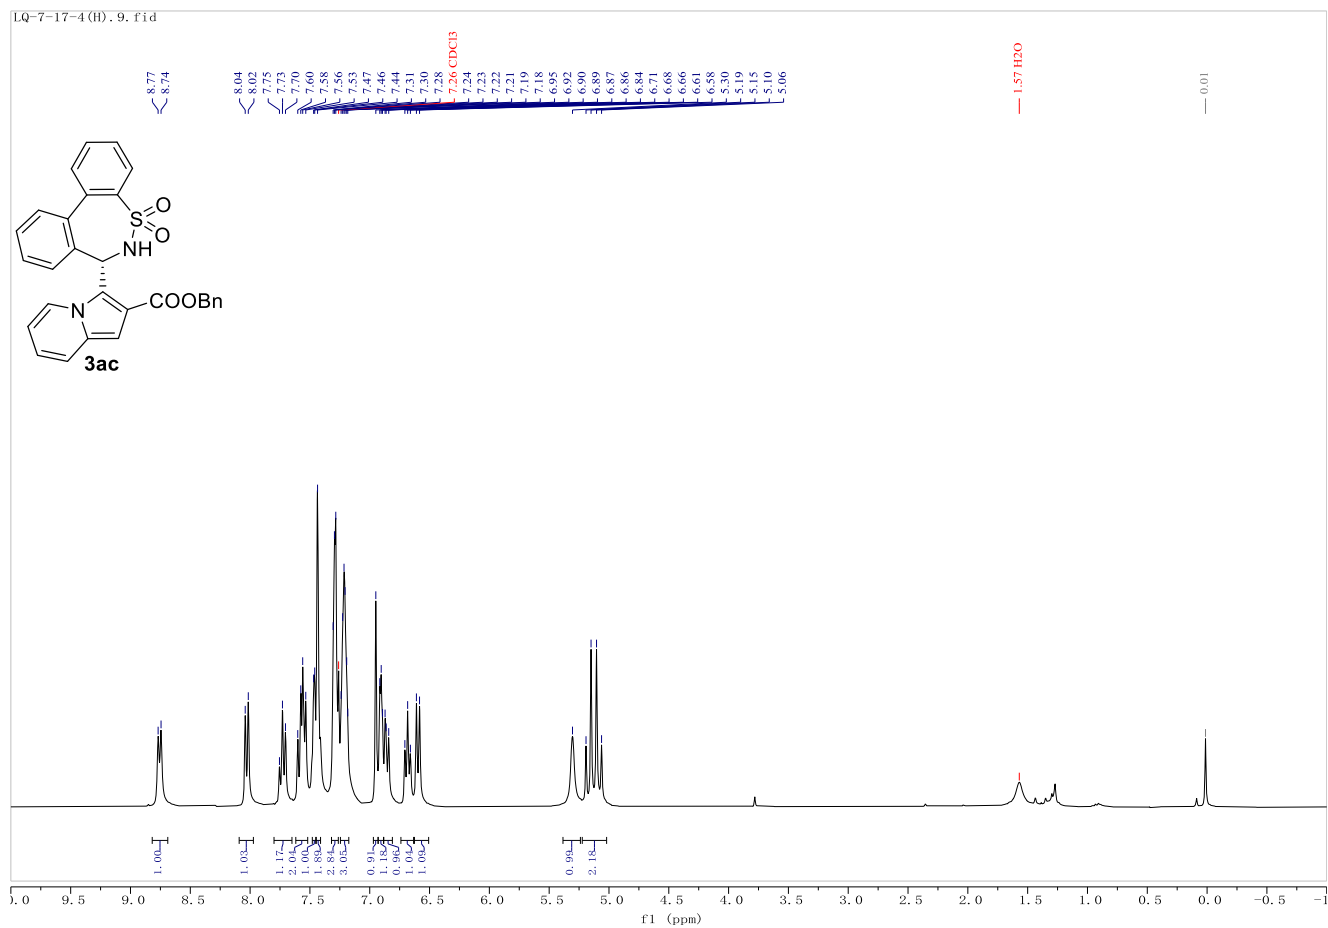

**3ac**,  $^{13}\text{C-NMR}$  in  $\text{CDCl}_3$

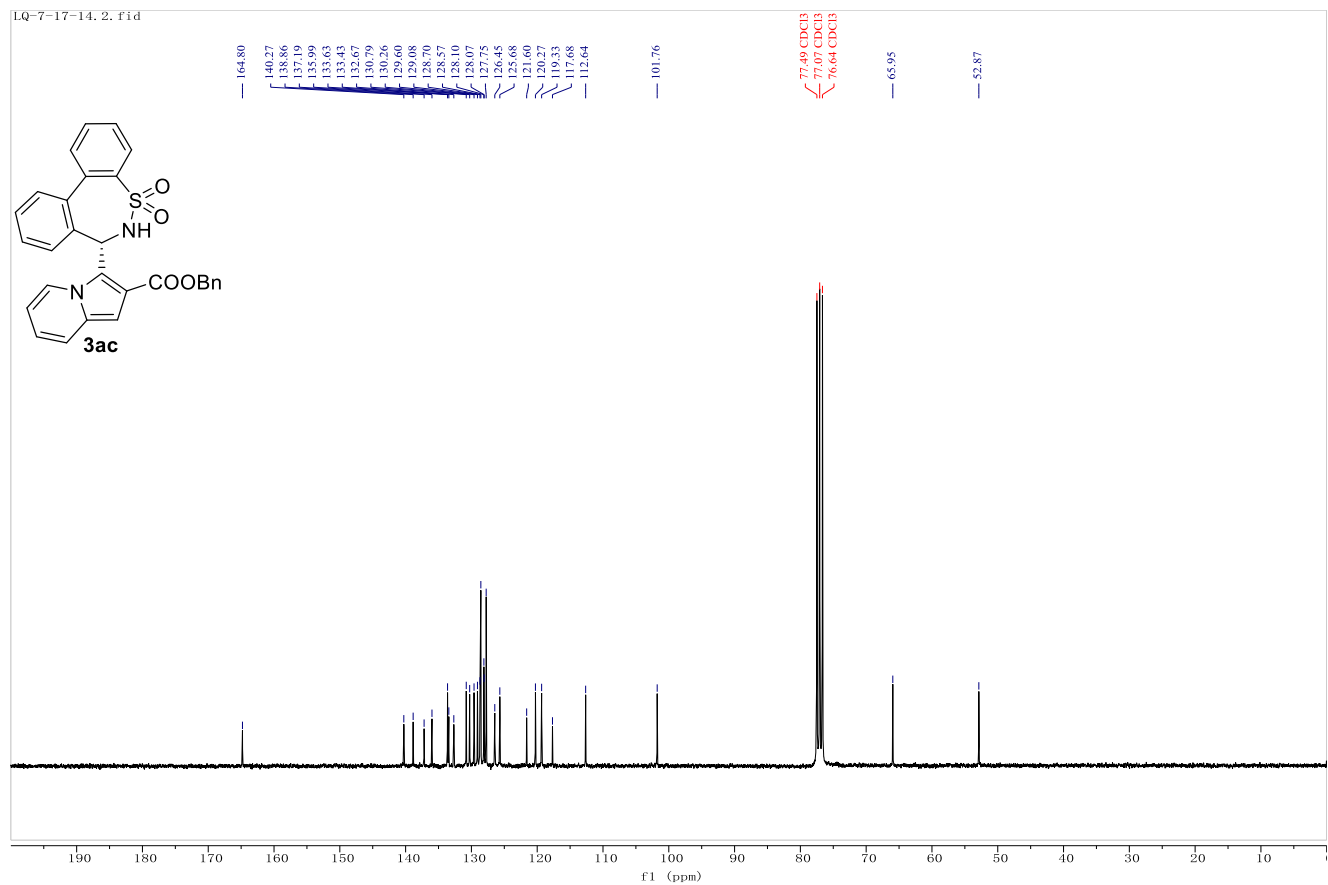

### 3ad, <sup>1</sup>H-NMR in CDCl<sub>3</sub>

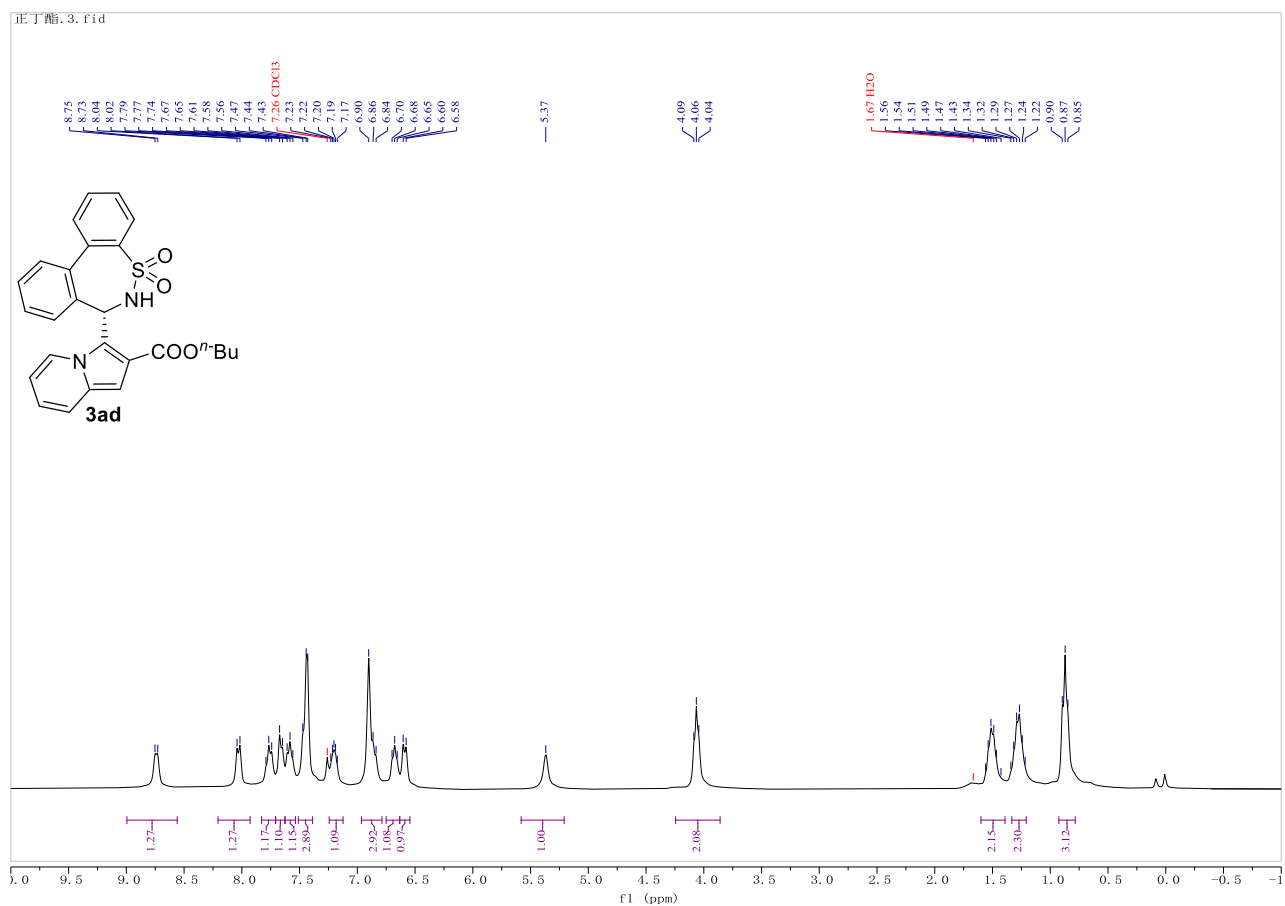

### 3ad, <sup>13</sup>C-NMR in CDCl<sub>3</sub>

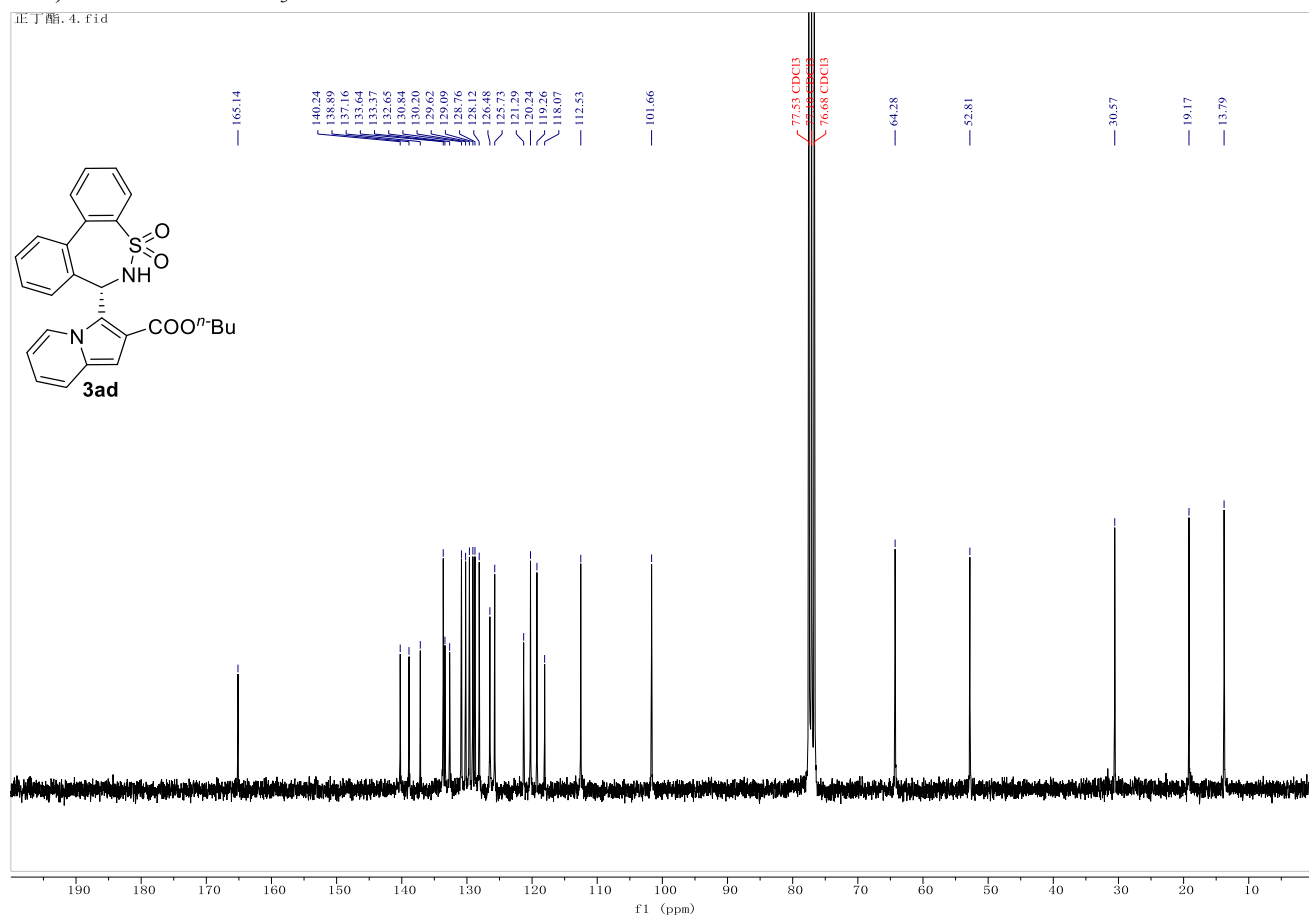

### 3ae, <sup>1</sup>H-NMR in CDCl<sub>3</sub>

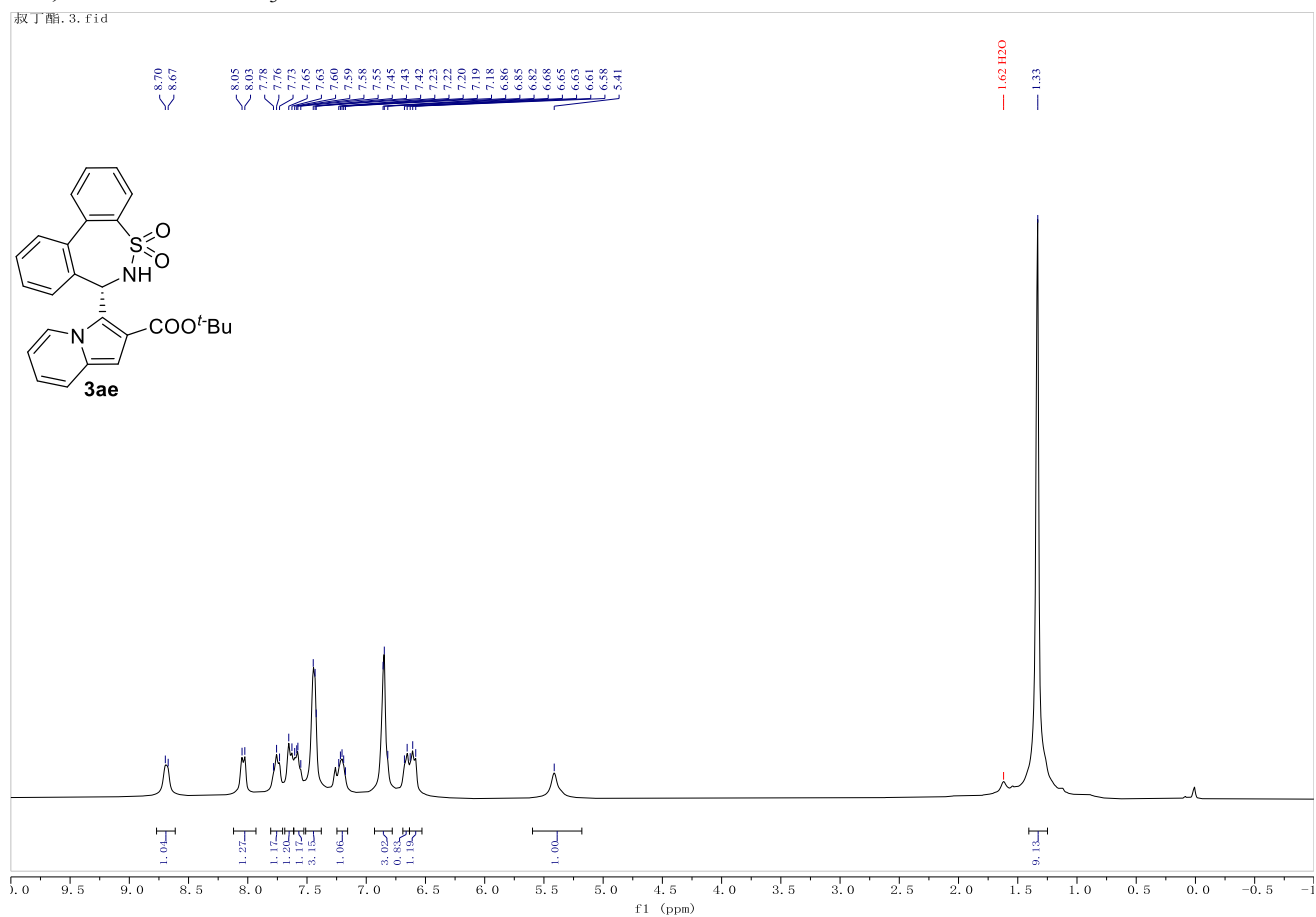

### 3ae, <sup>13</sup>C-NMR in CDCl<sub>3</sub>

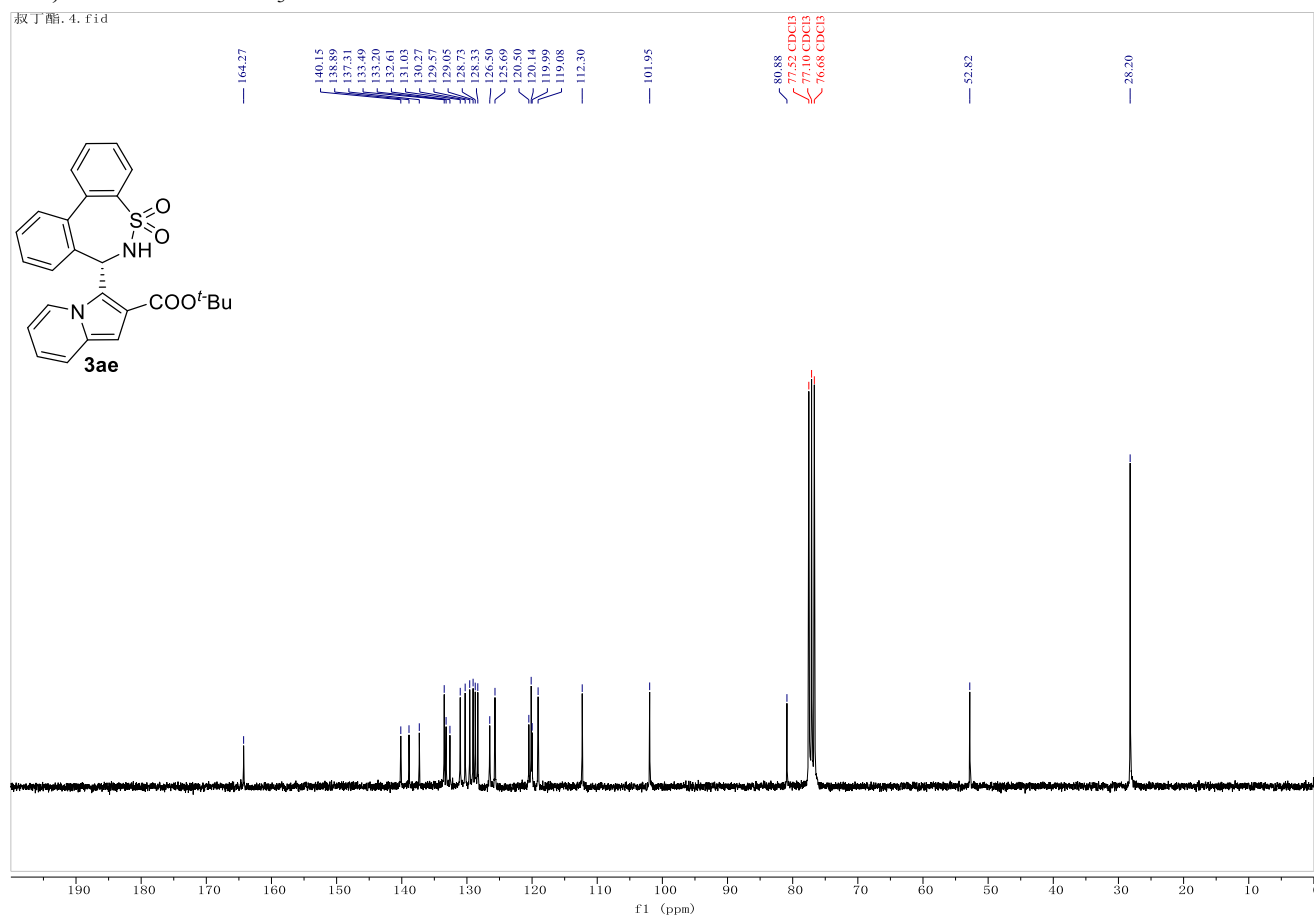

### 3af, <sup>1</sup>H-NMR in CDCl<sub>3</sub>

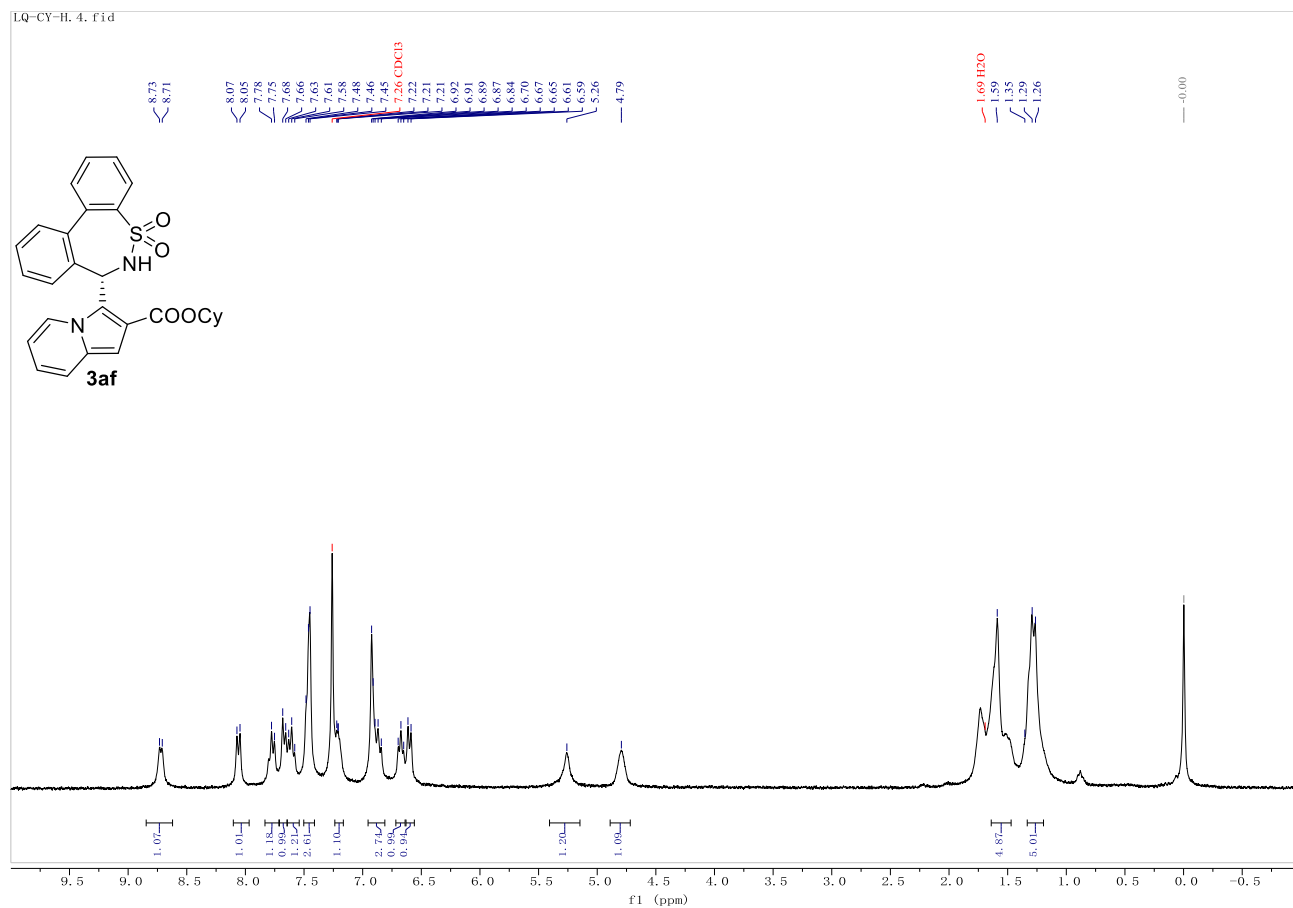

### 3af, <sup>13</sup>C-NMR in CDCl<sub>3</sub>

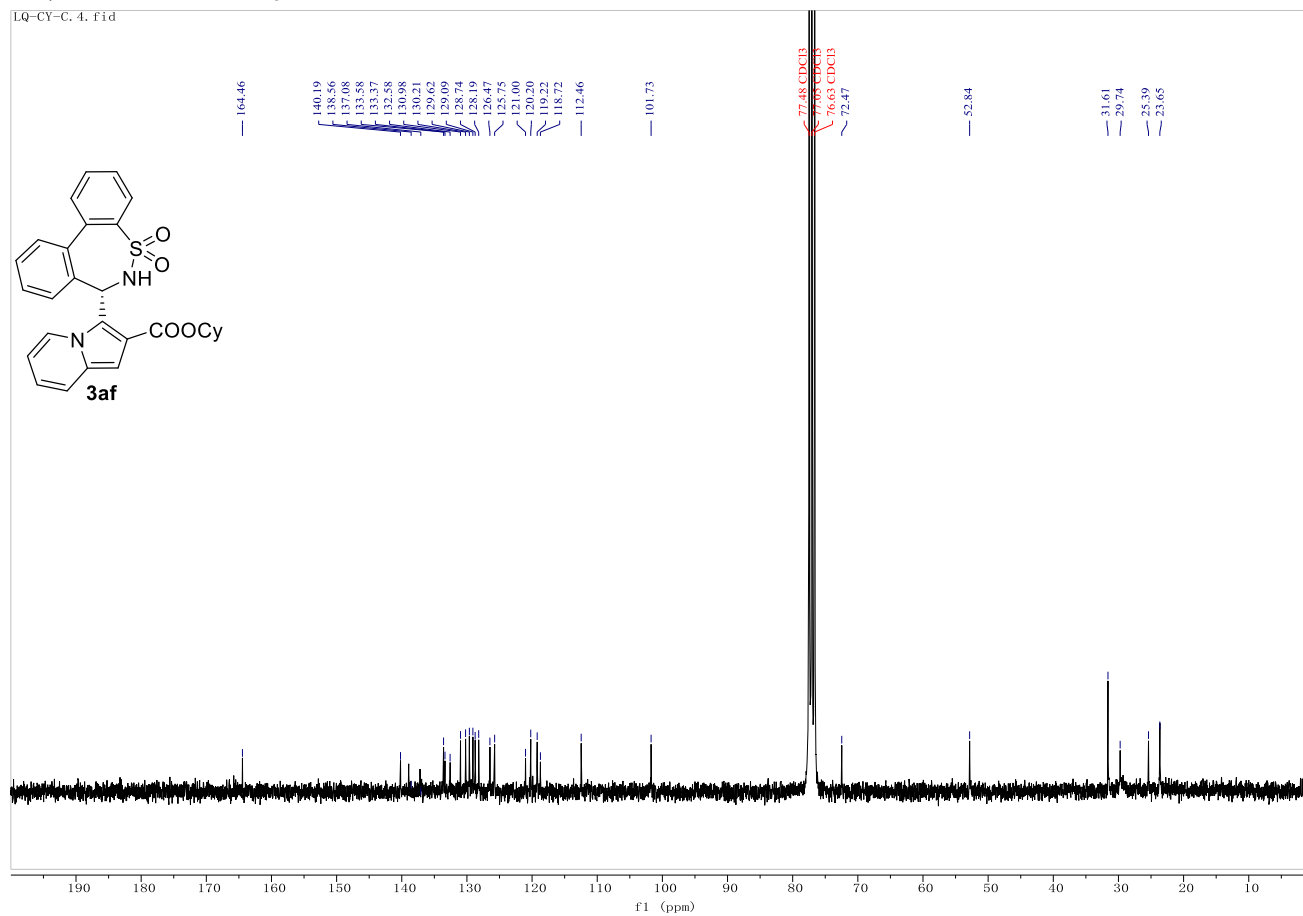

### 3ag, <sup>1</sup>H-NMR in CDCl<sub>3</sub>

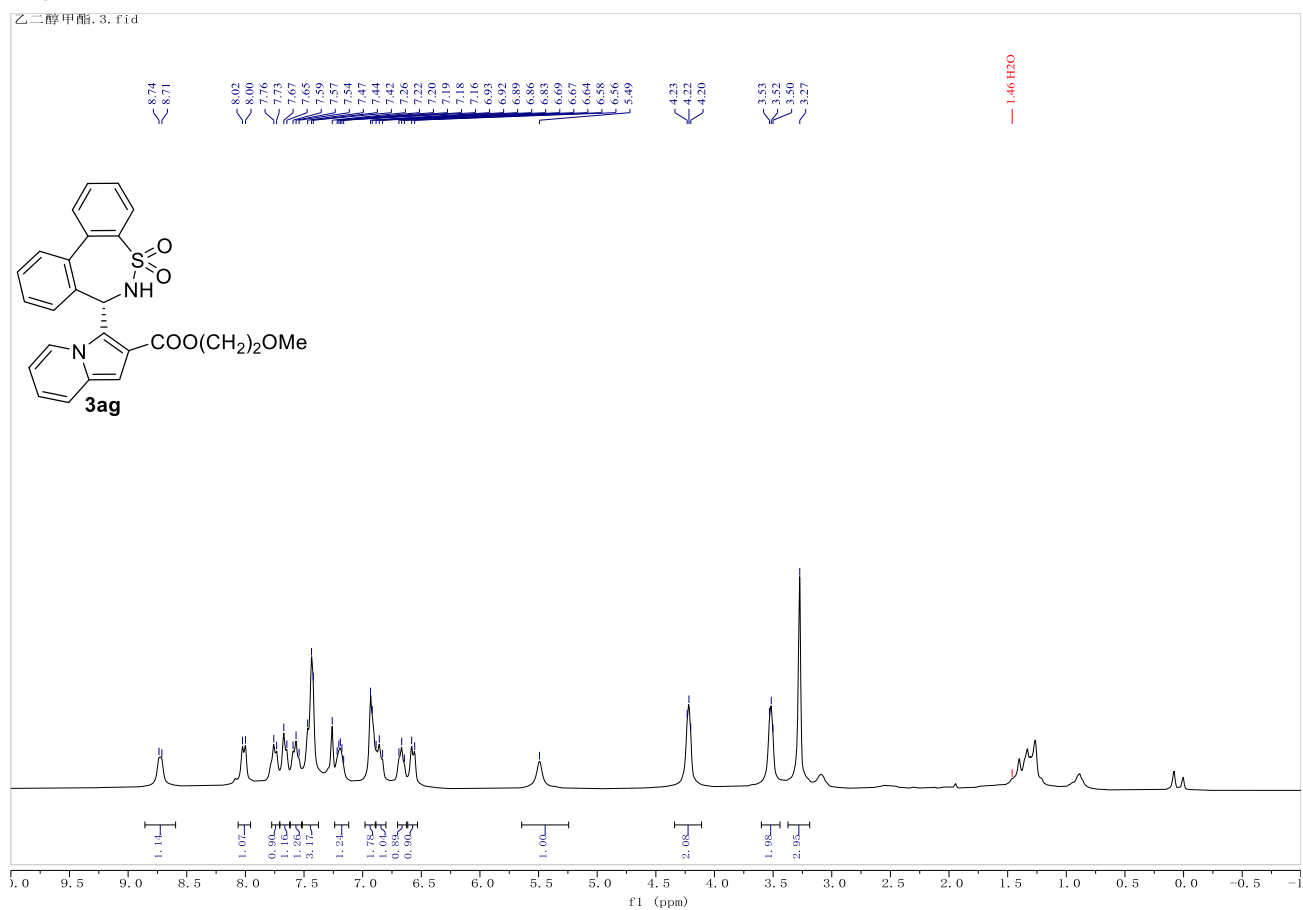

### 3ag, <sup>13</sup>C-NMR in CDCl<sub>3</sub>

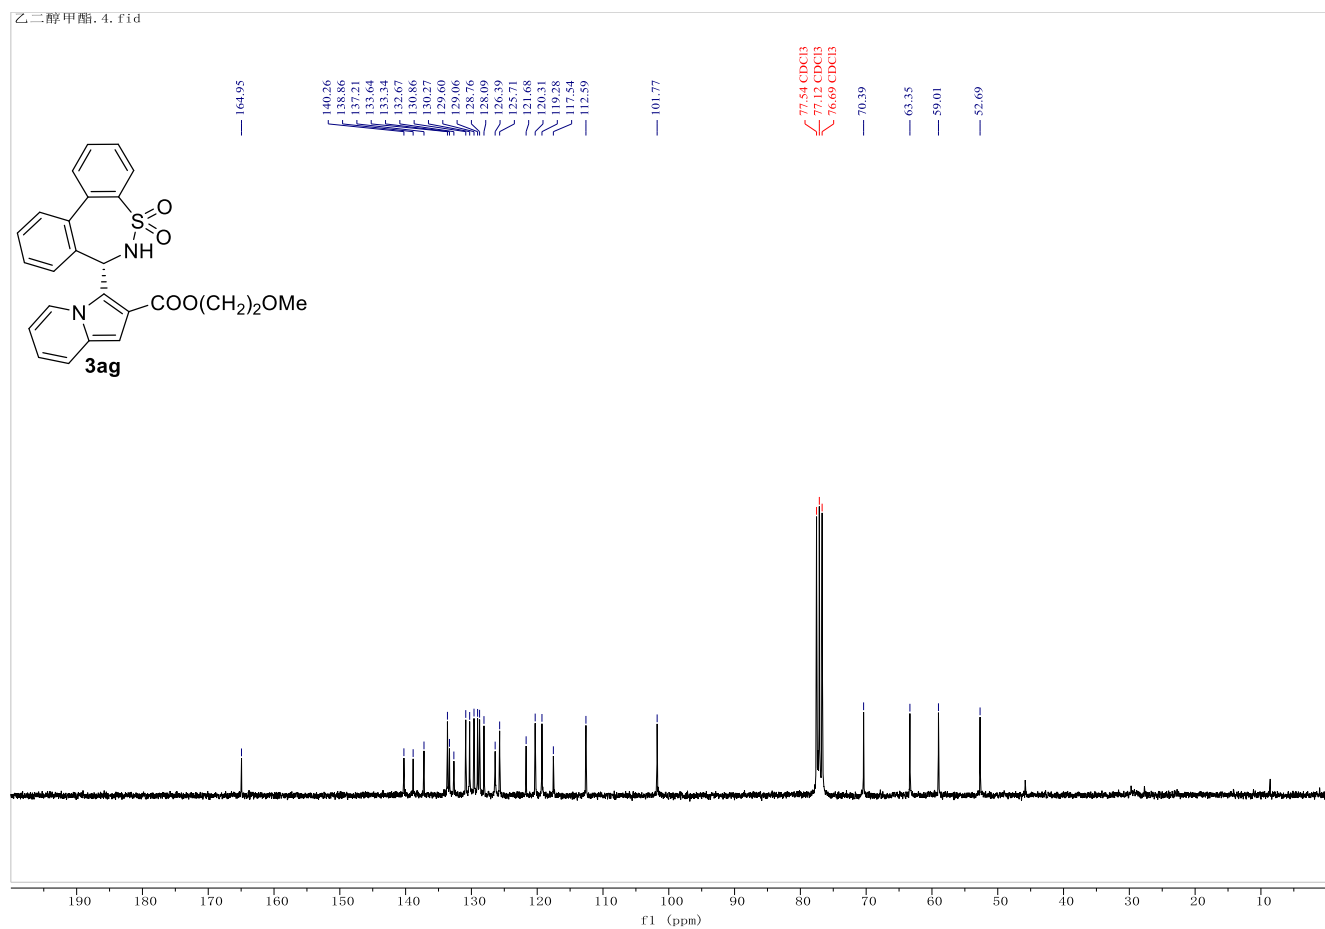

### 3ah, <sup>1</sup>H-NMR in CDCl<sub>3</sub>

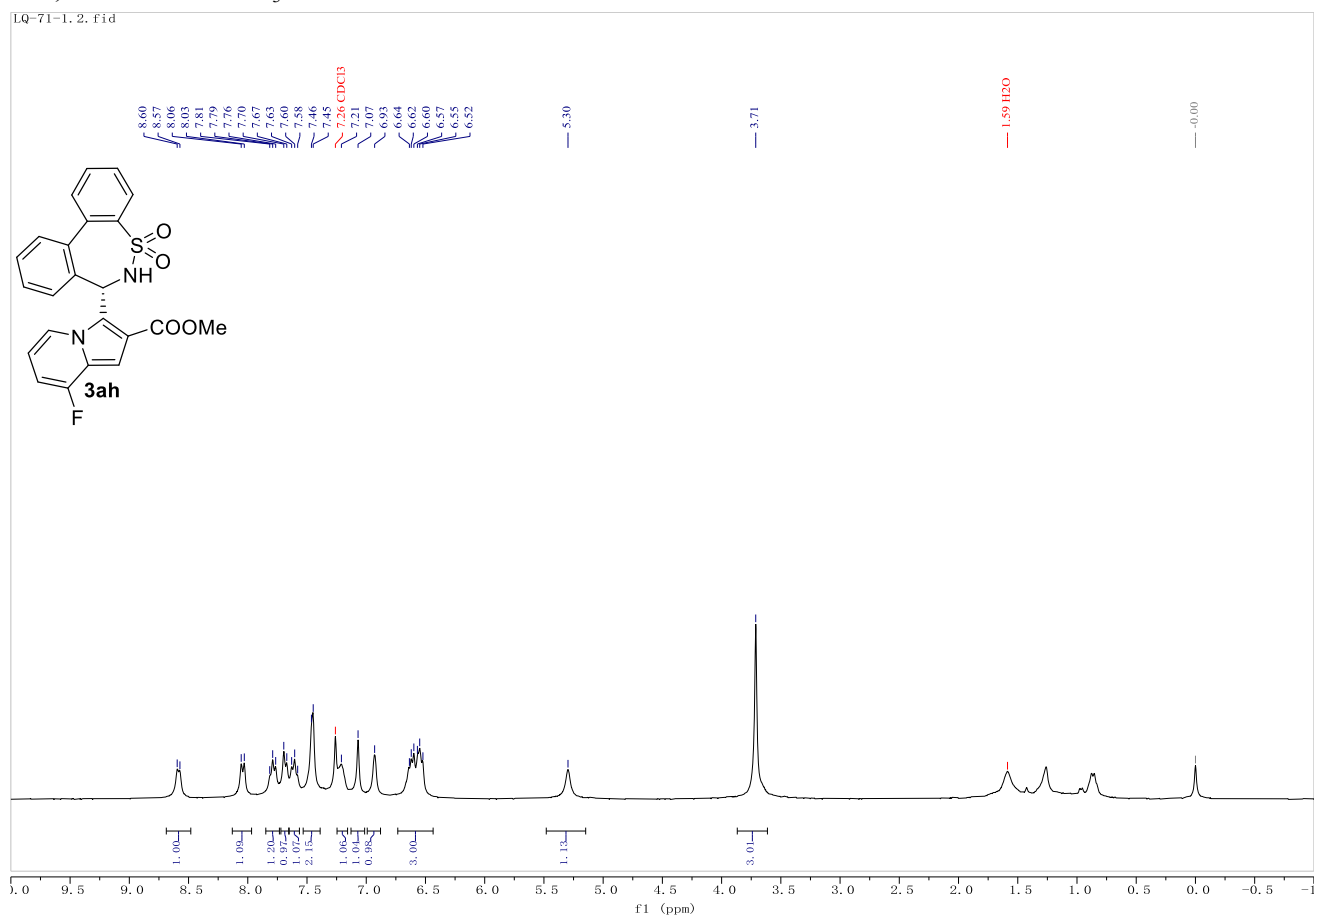

### 3ah, <sup>13</sup>C-NMR in CDCl<sub>3</sub>

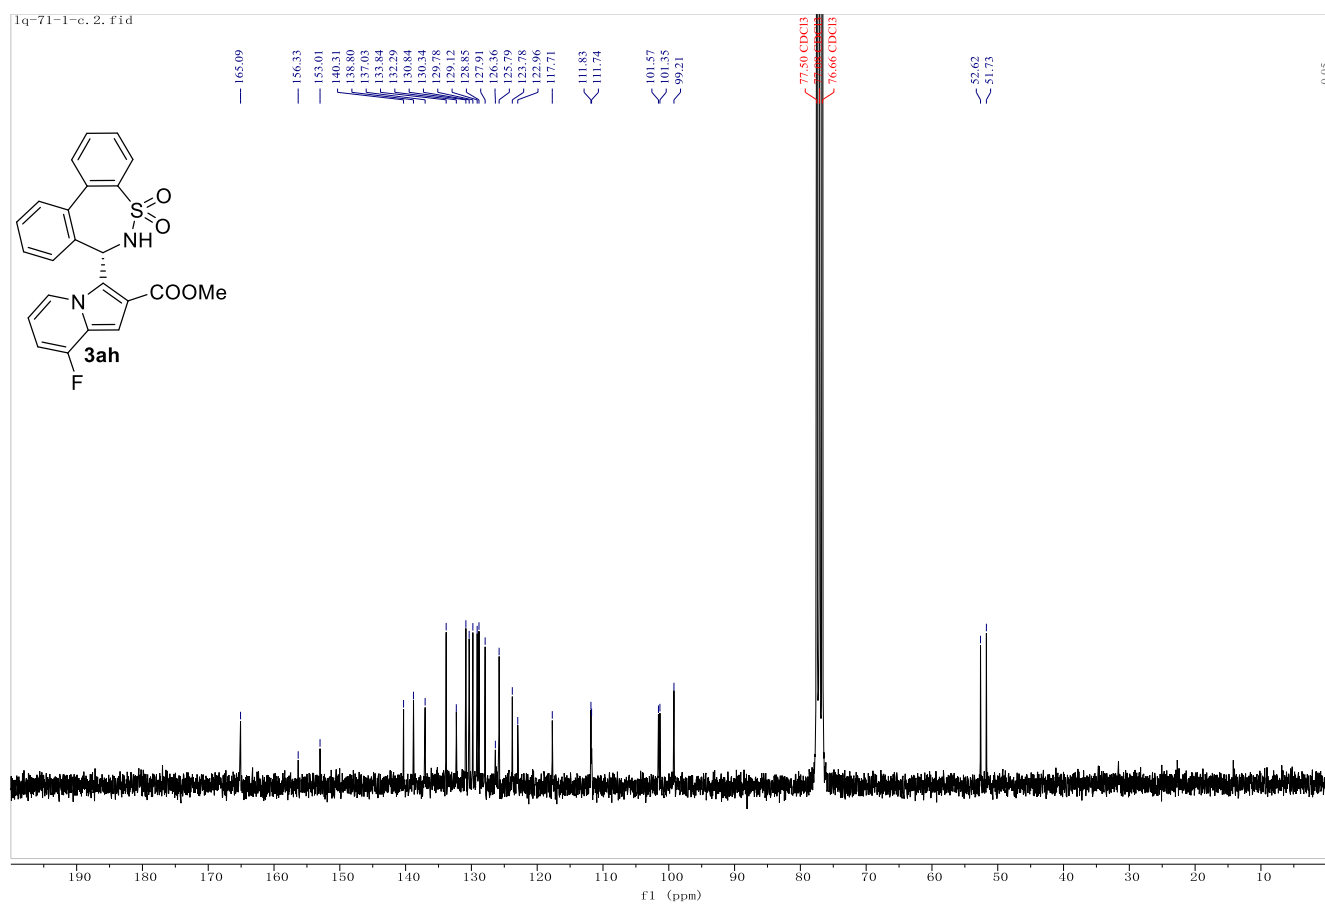



### 3ah, <sup>19</sup>F-NMR in CDCl<sub>3</sub>

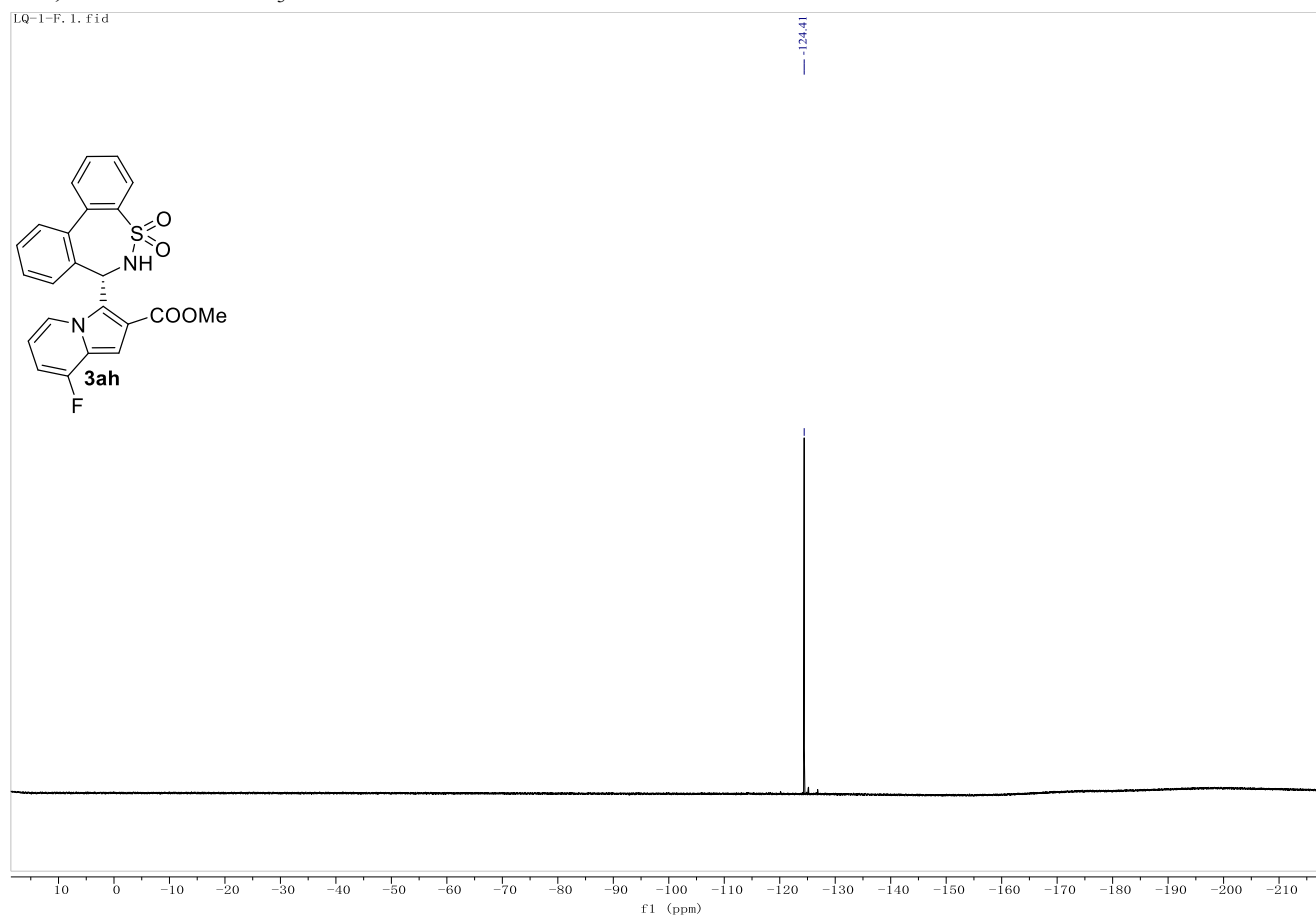

### 3ai, <sup>1</sup>H-NMR in CDCl<sub>3</sub>

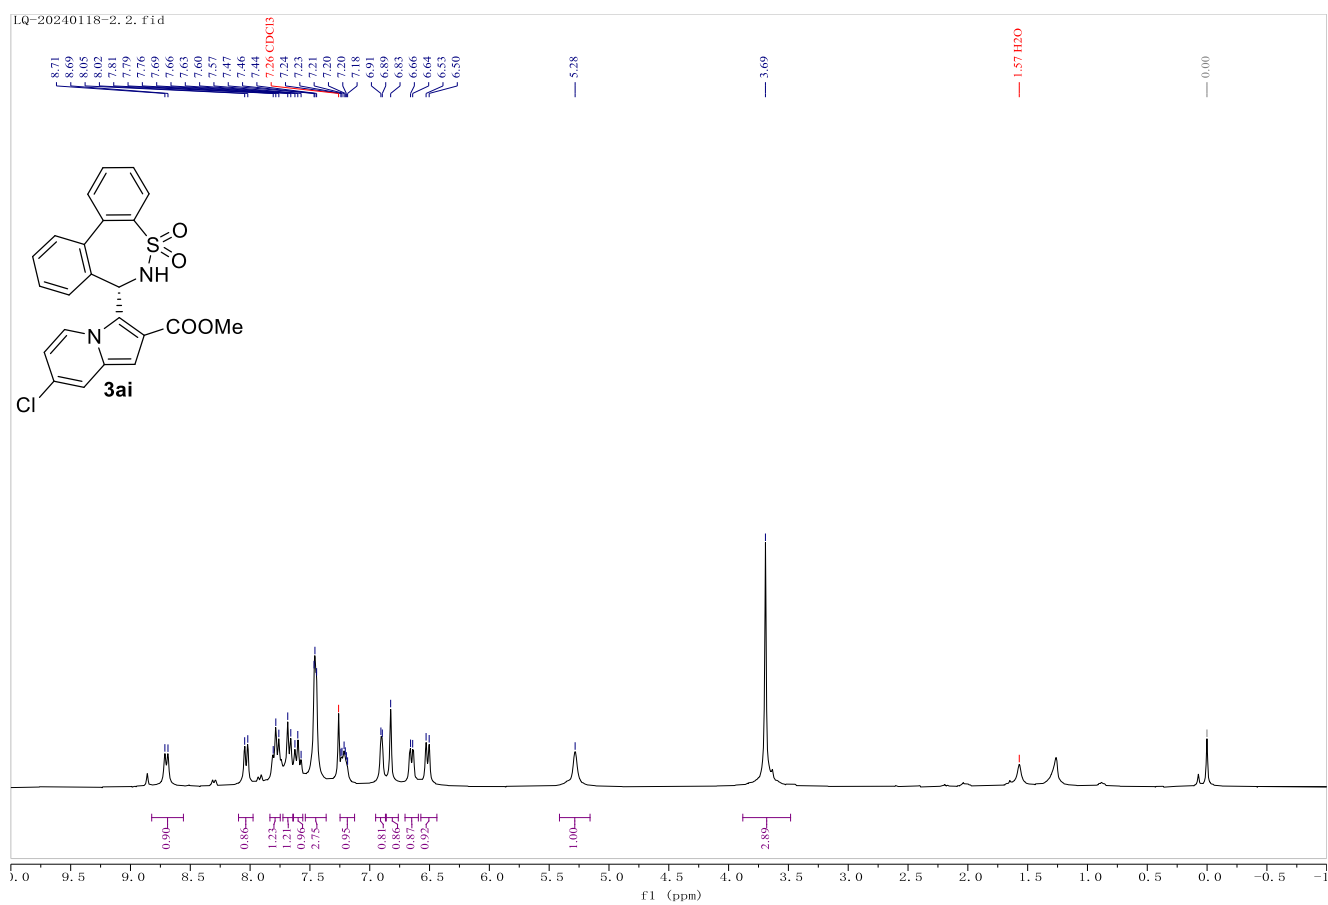

### 3ai, <sup>13</sup>C-NMR in CDCl<sub>3</sub>

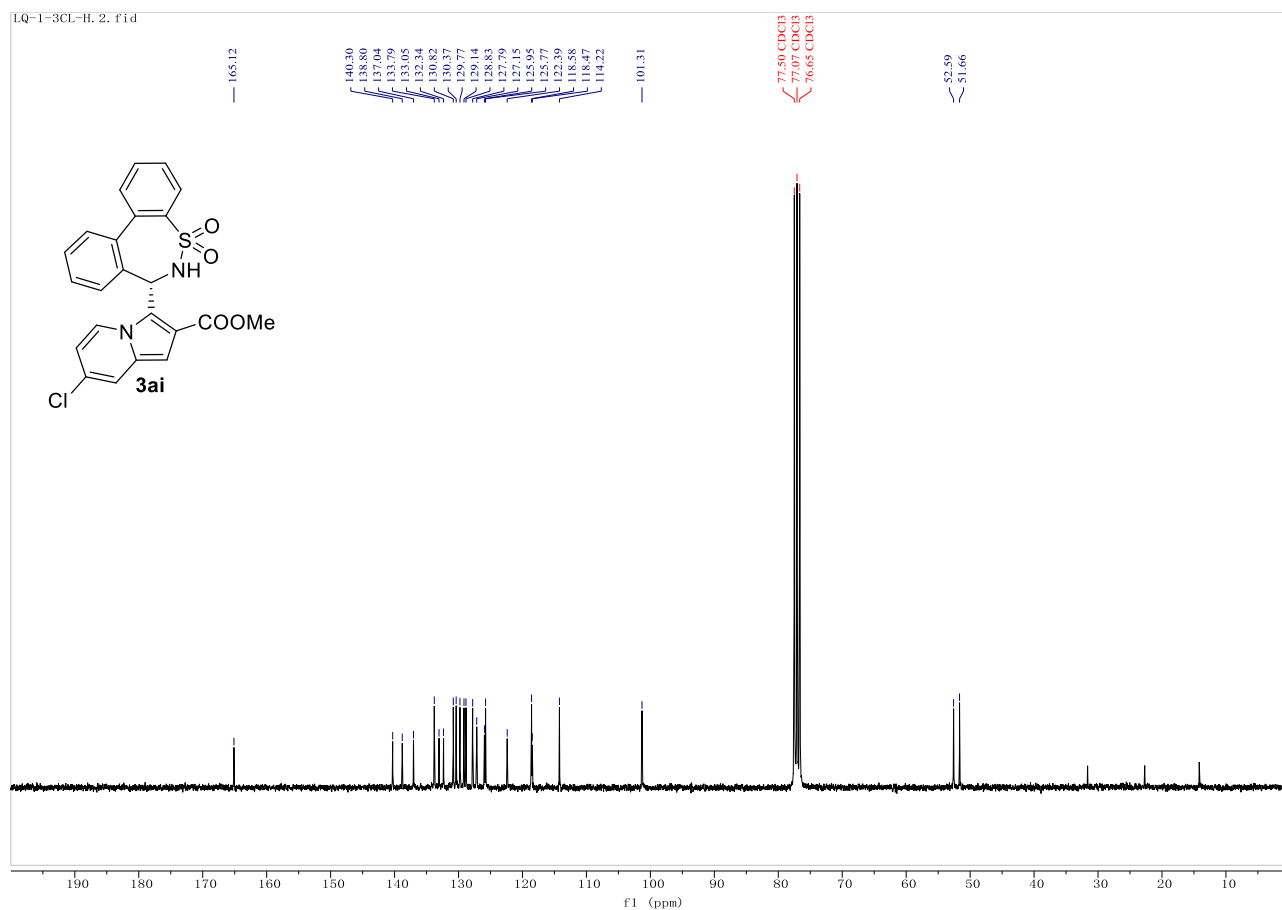

### 3aj, <sup>1</sup>H-NMR in CDCl<sub>3</sub>

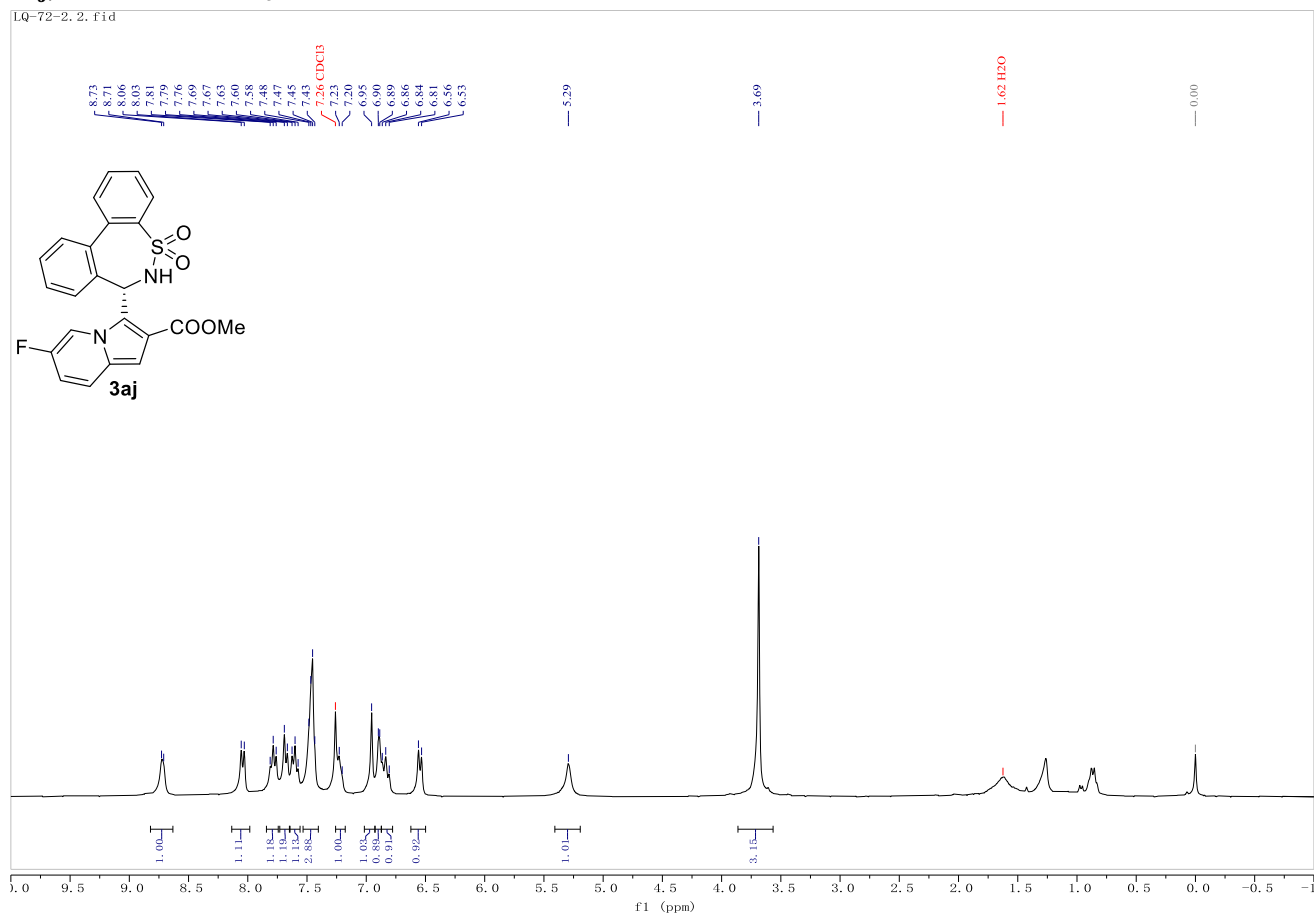

### 3aj, <sup>13</sup>C-NMR in CDCl<sub>3</sub>

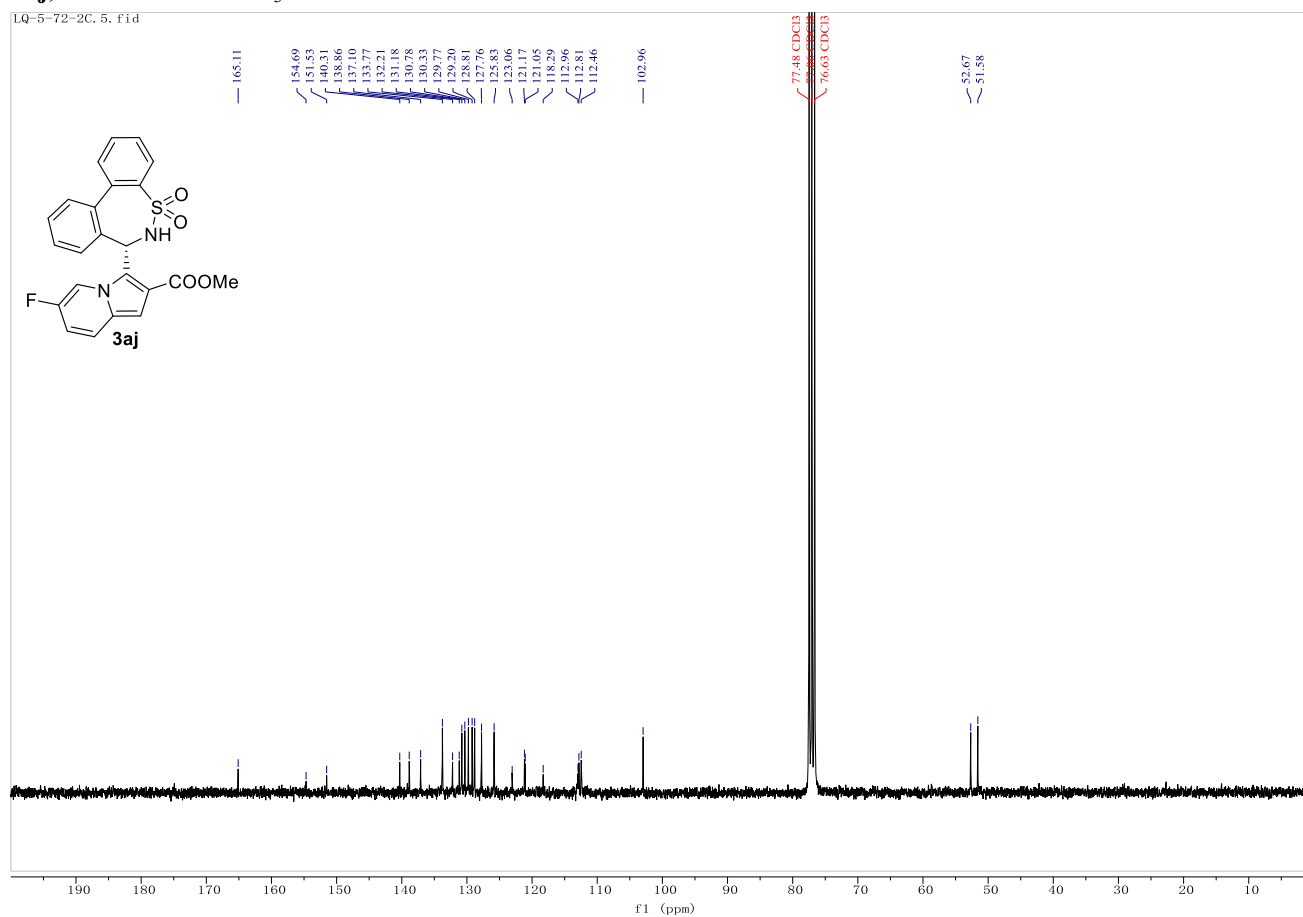

### 3aj, <sup>19</sup>F-NMR in CDCl<sub>3</sub>

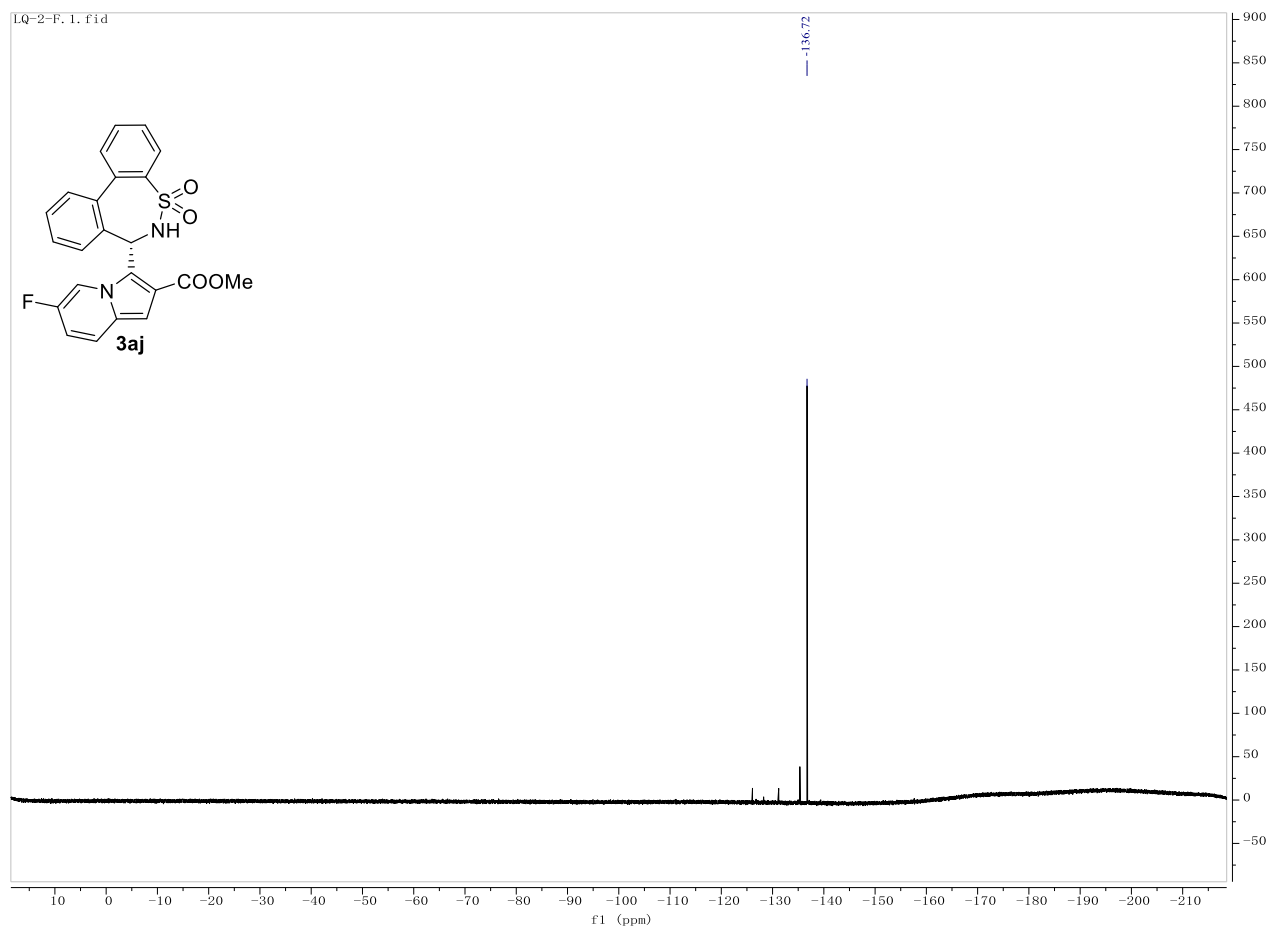

### 3ak, <sup>1</sup>H-NMR in CDCl<sub>3</sub>

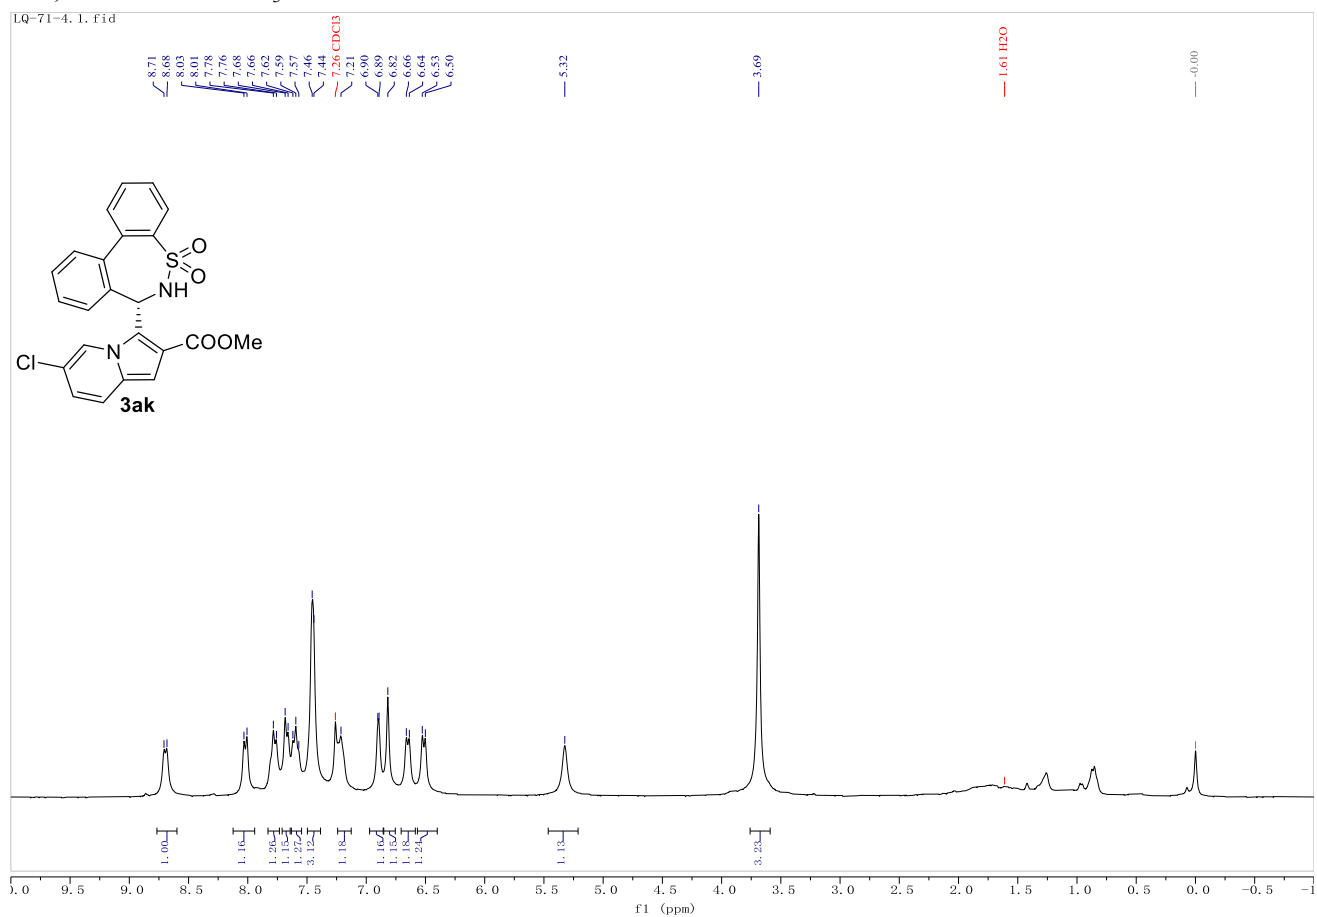

### 3ak, <sup>13</sup>C-NMR in CDCl<sub>3</sub>

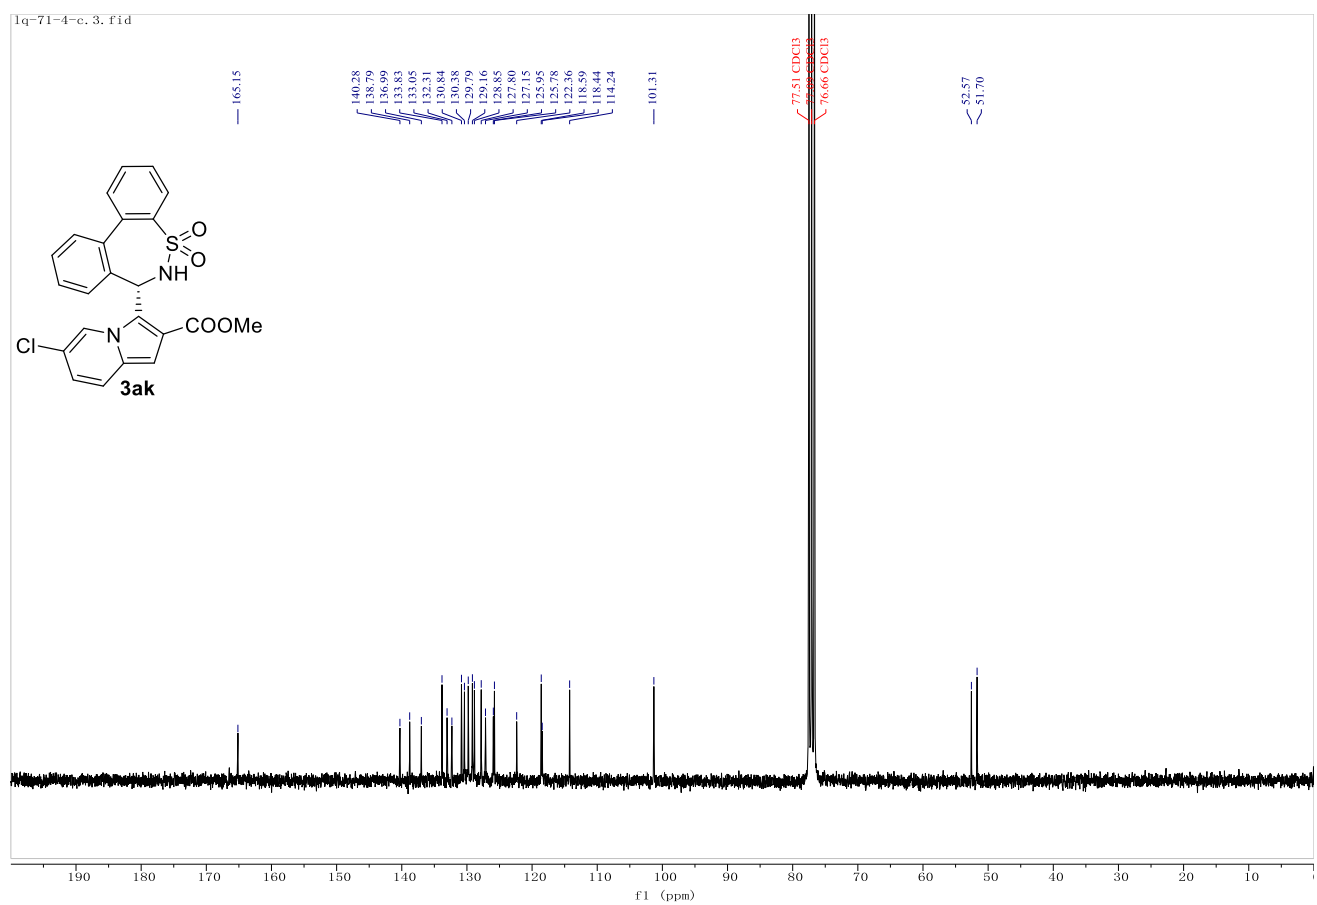

### 3al, <sup>1</sup>H-NMR in CDCl<sub>3</sub>

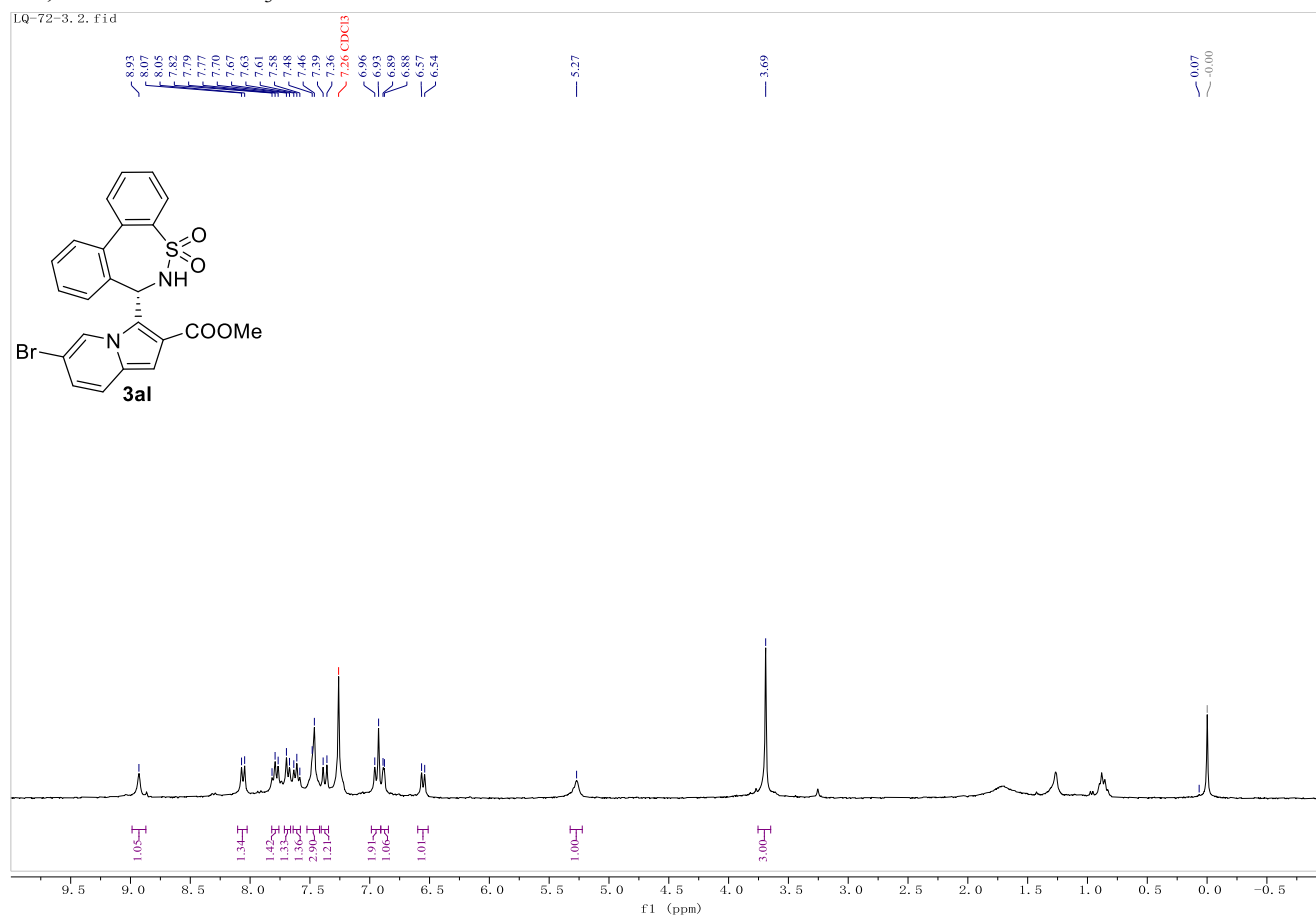

### 3al, <sup>13</sup>C-NMR in CDCl<sub>3</sub>

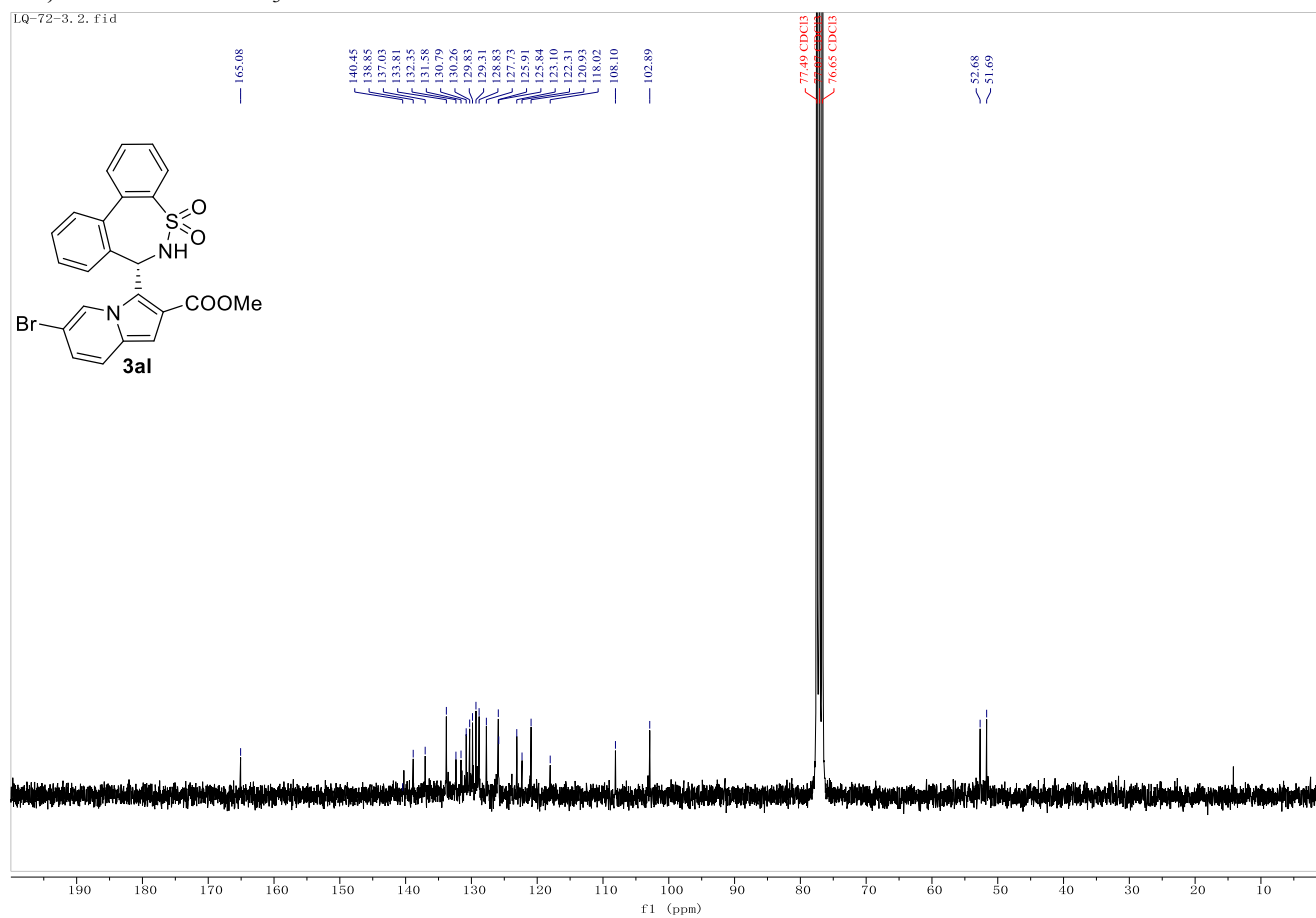

### 3am, <sup>1</sup>H-NMR in CDCl<sub>3</sub>

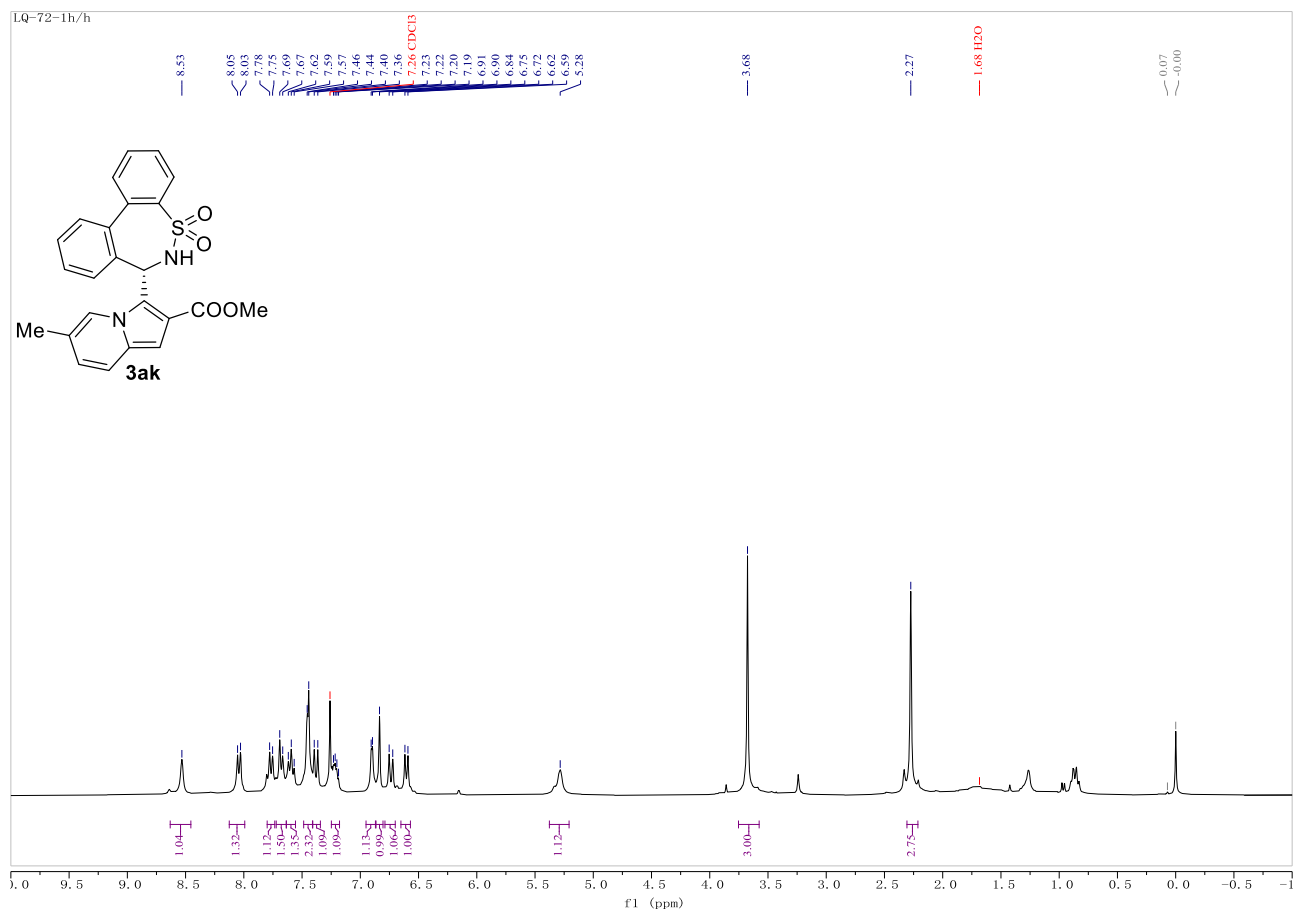

### 3am, <sup>13</sup>C-NMR in CDCl<sub>3</sub>

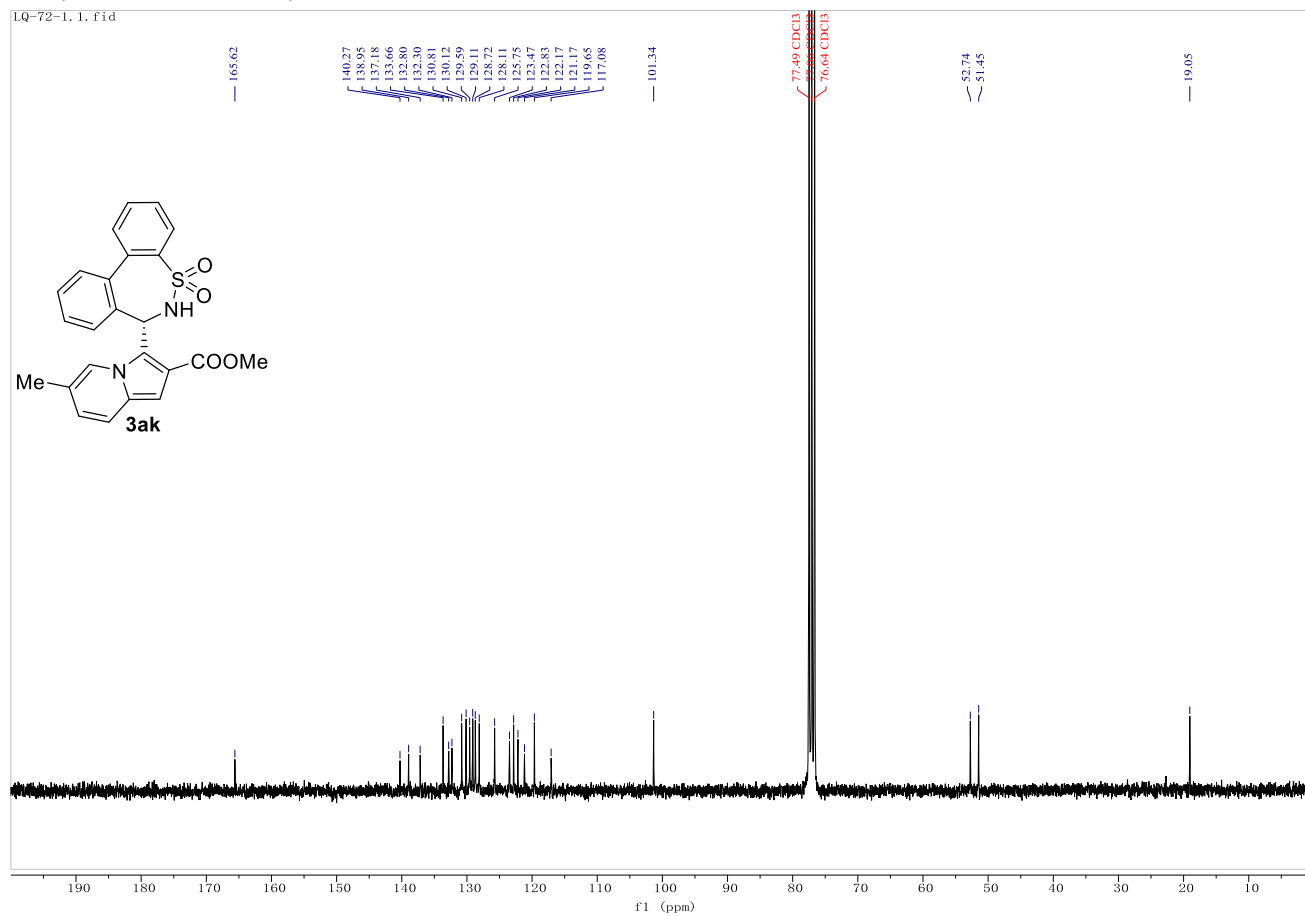

### 3ba, <sup>1</sup>H-NMR in CDCl<sub>3</sub>

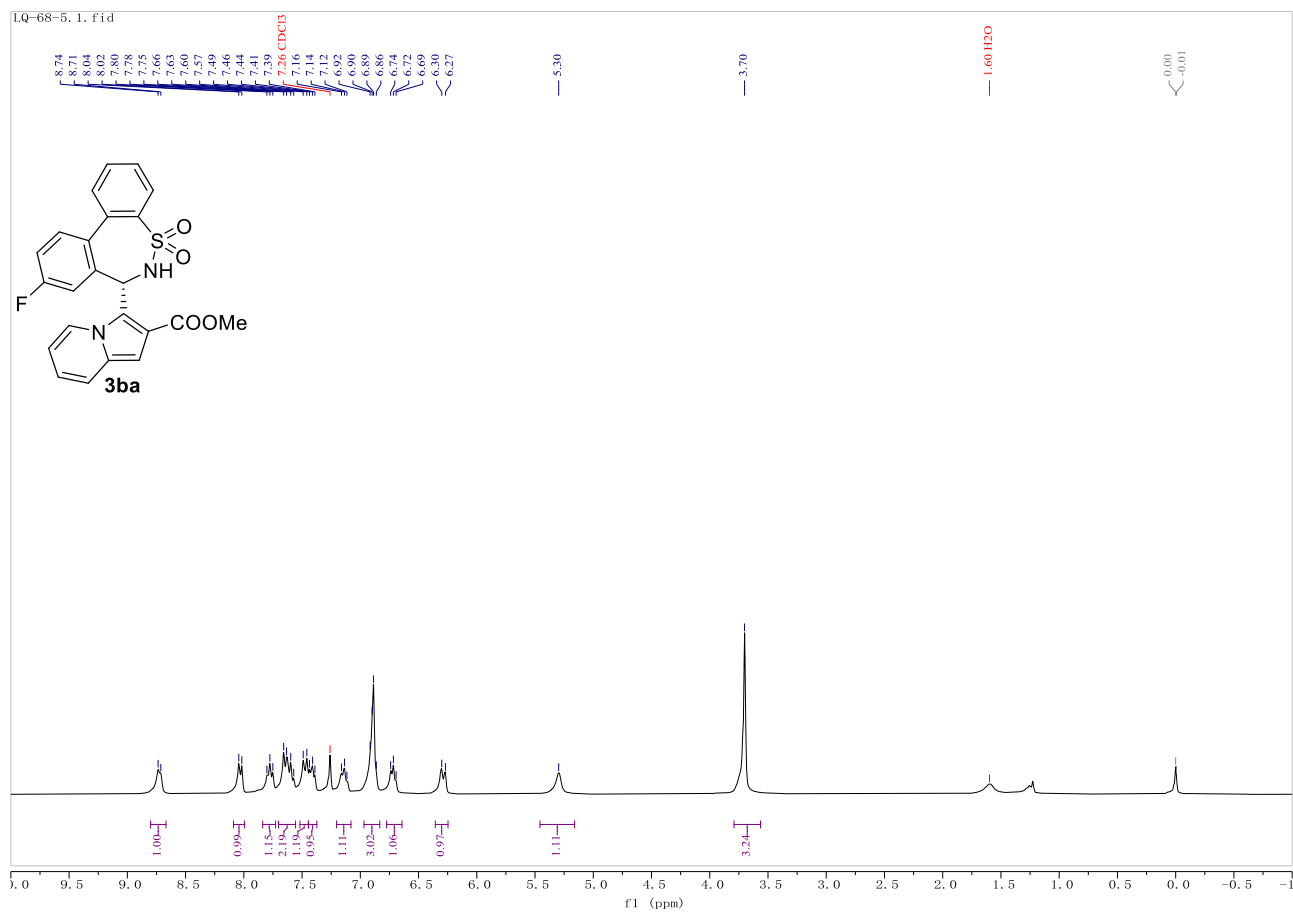

### 3ba, <sup>13</sup>C-NMR in CDCl<sub>3</sub>

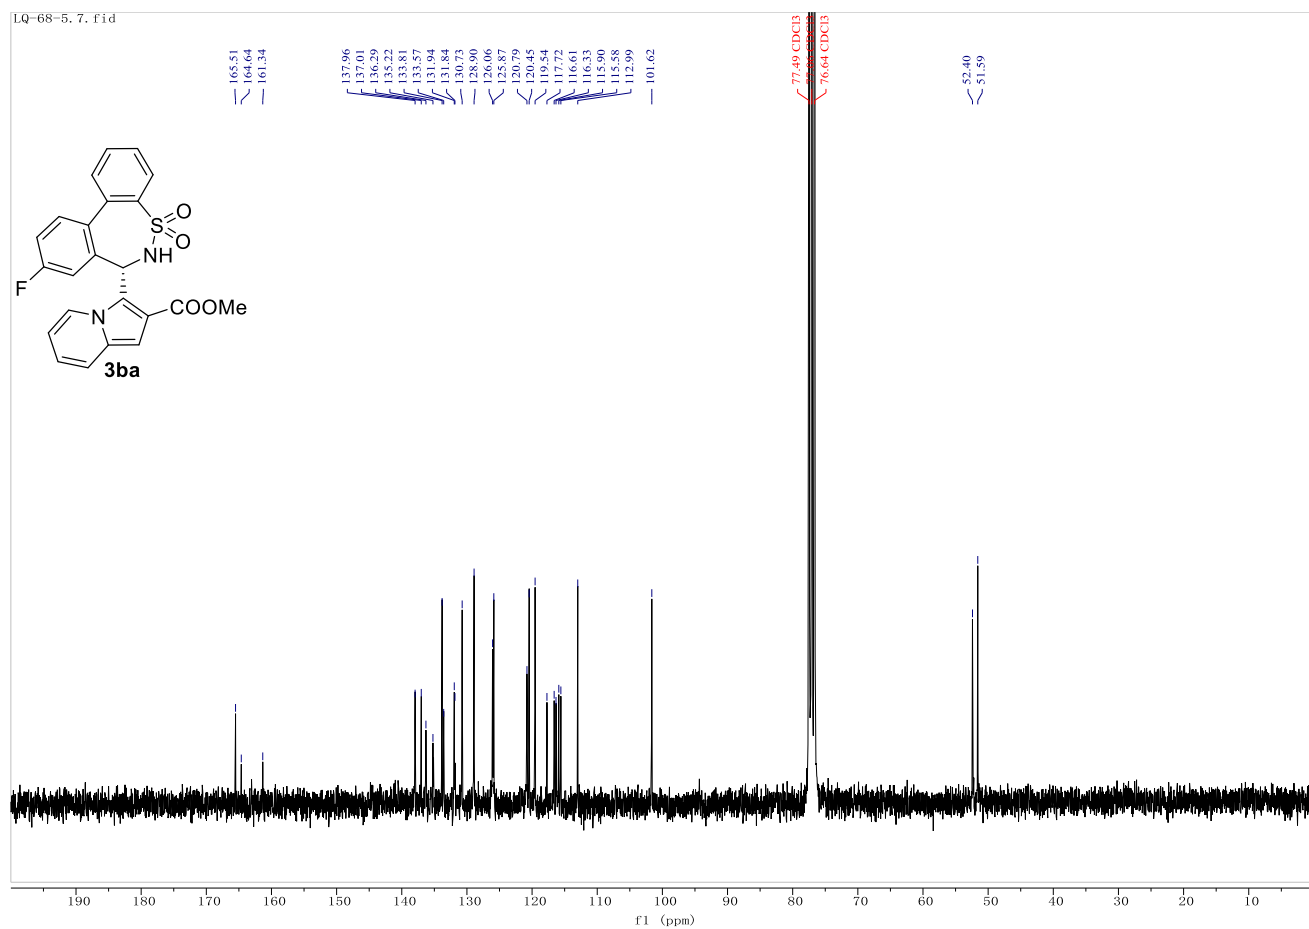

### 3ba, <sup>19</sup>F-NMR in CDCl<sub>3</sub>

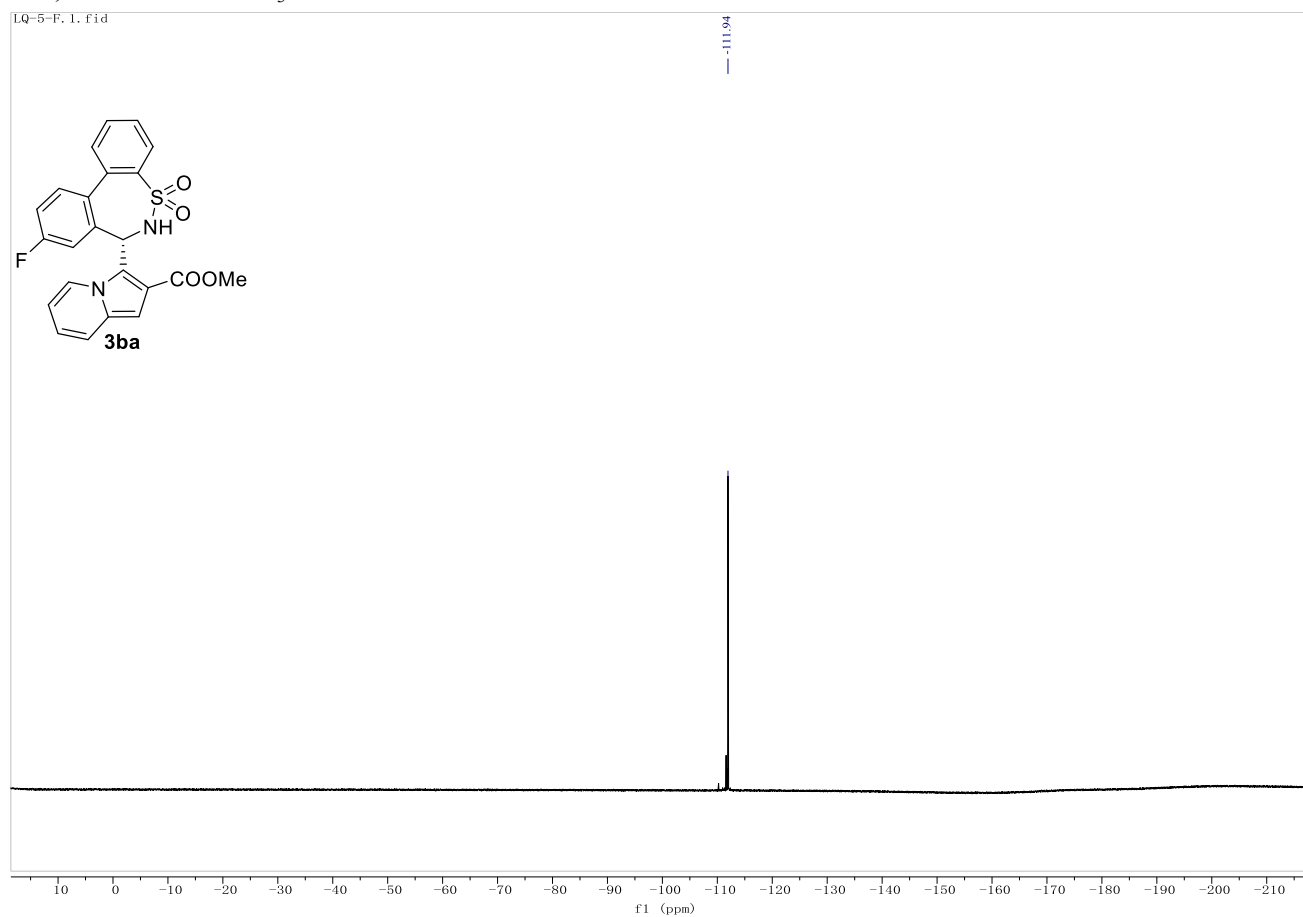

### 3ca, <sup>1</sup>H-NMR in CDCl<sub>3</sub>

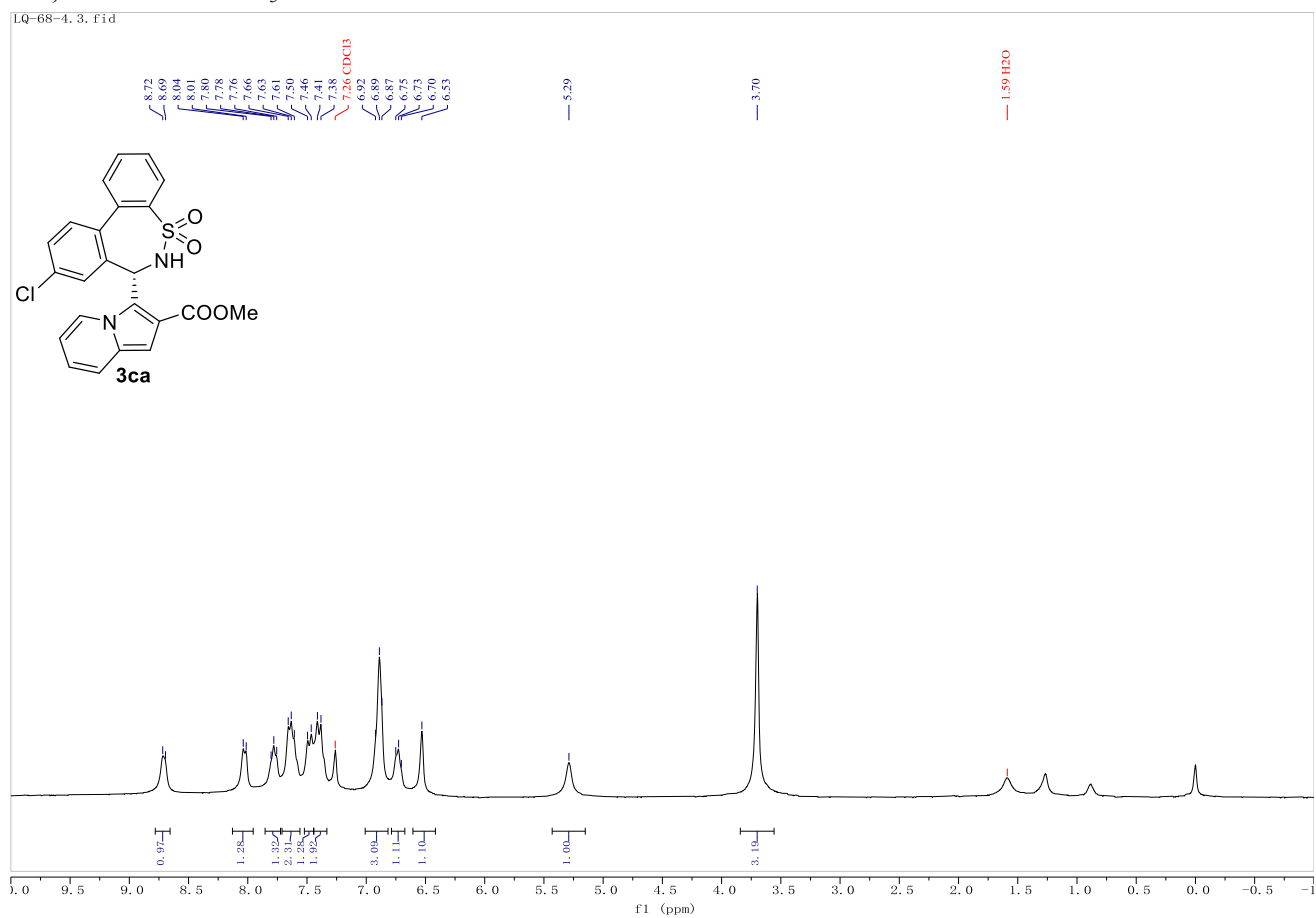



### 3ca, <sup>13</sup>C-NMR in CDCl<sub>3</sub>

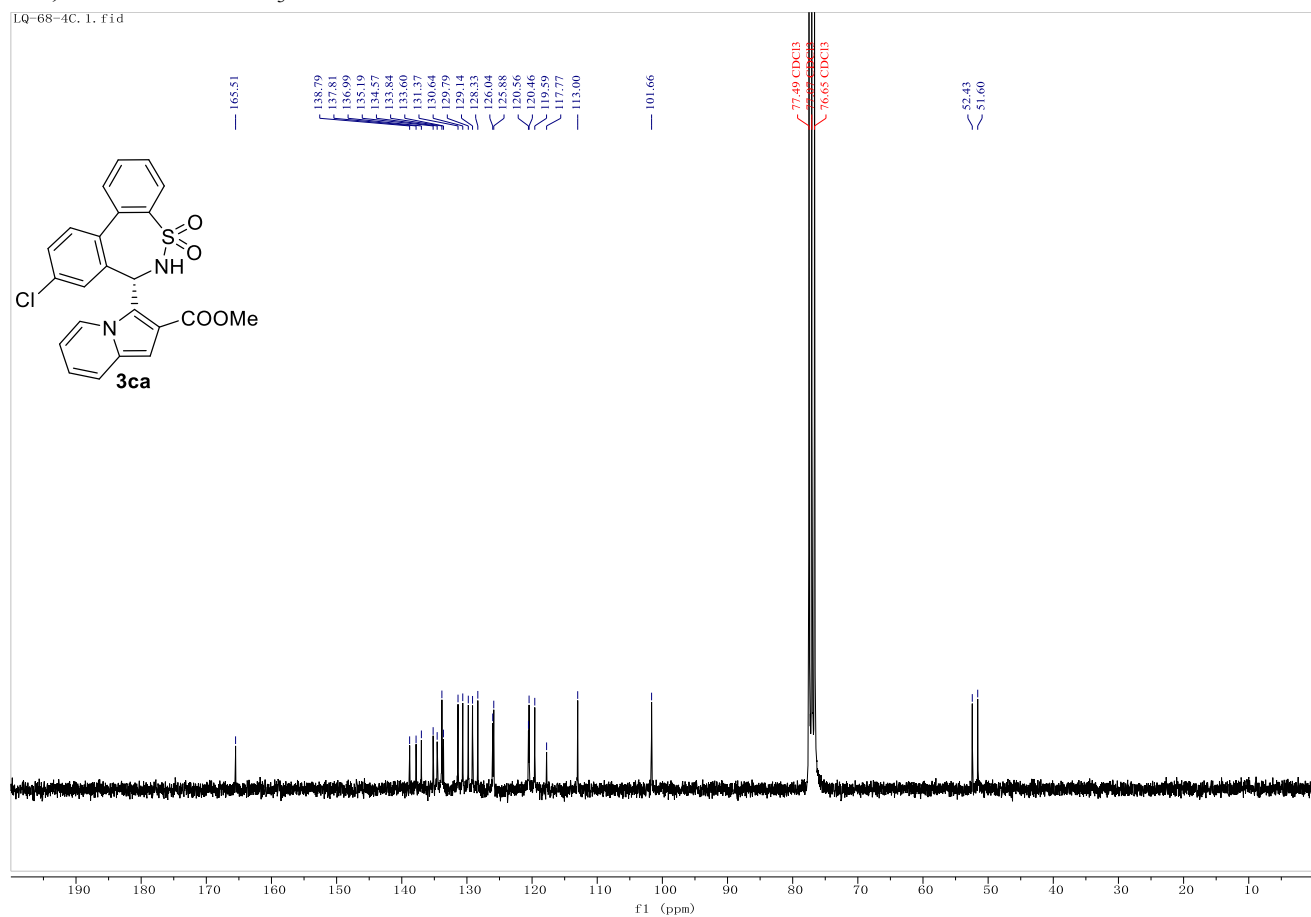

### 3da, <sup>1</sup>H-NMR in CDCl<sub>3</sub>

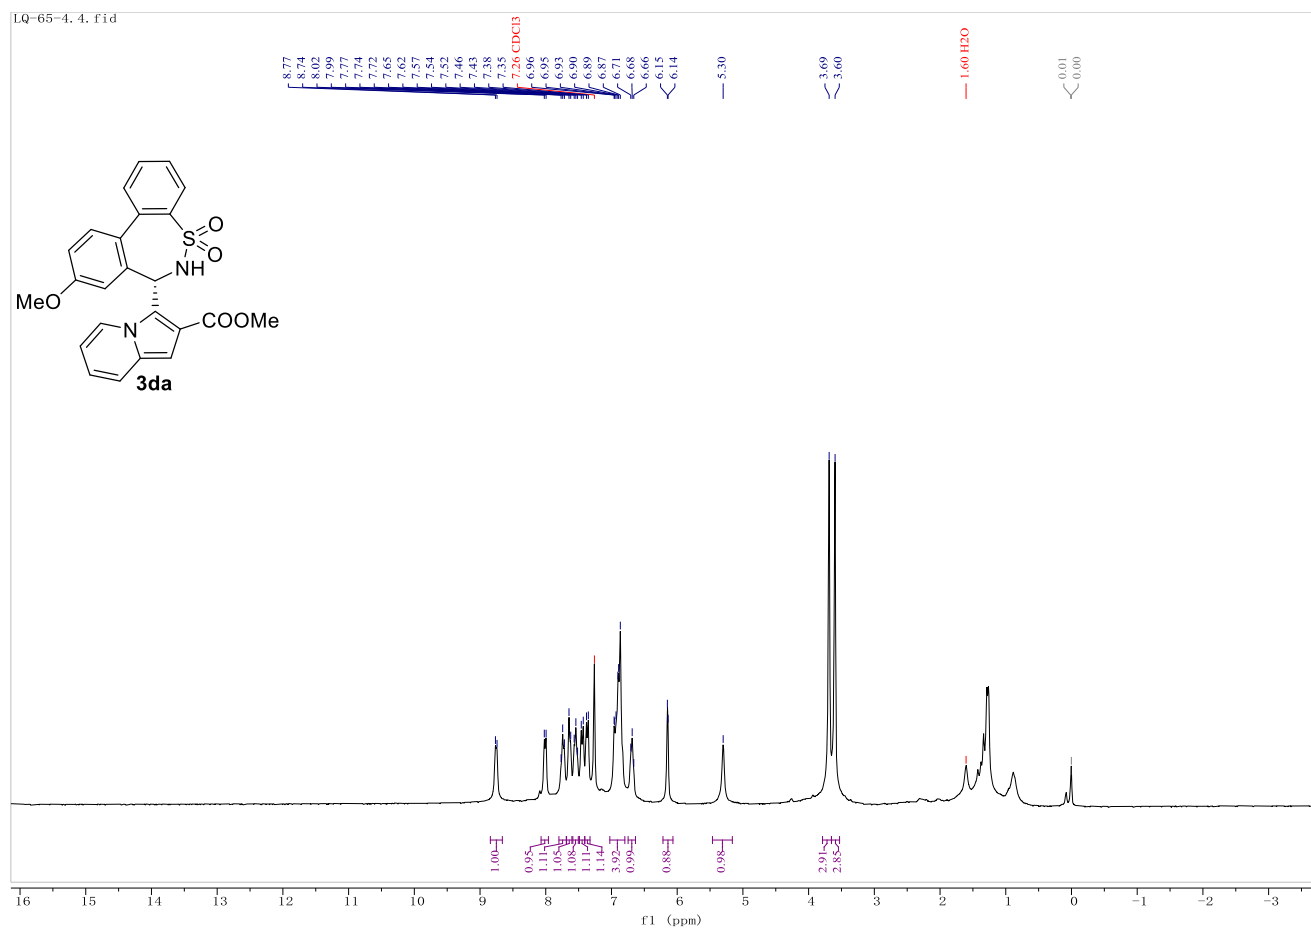

**3da**,  $^{13}\text{C}$ -NMR in  $\text{CDCl}_3$

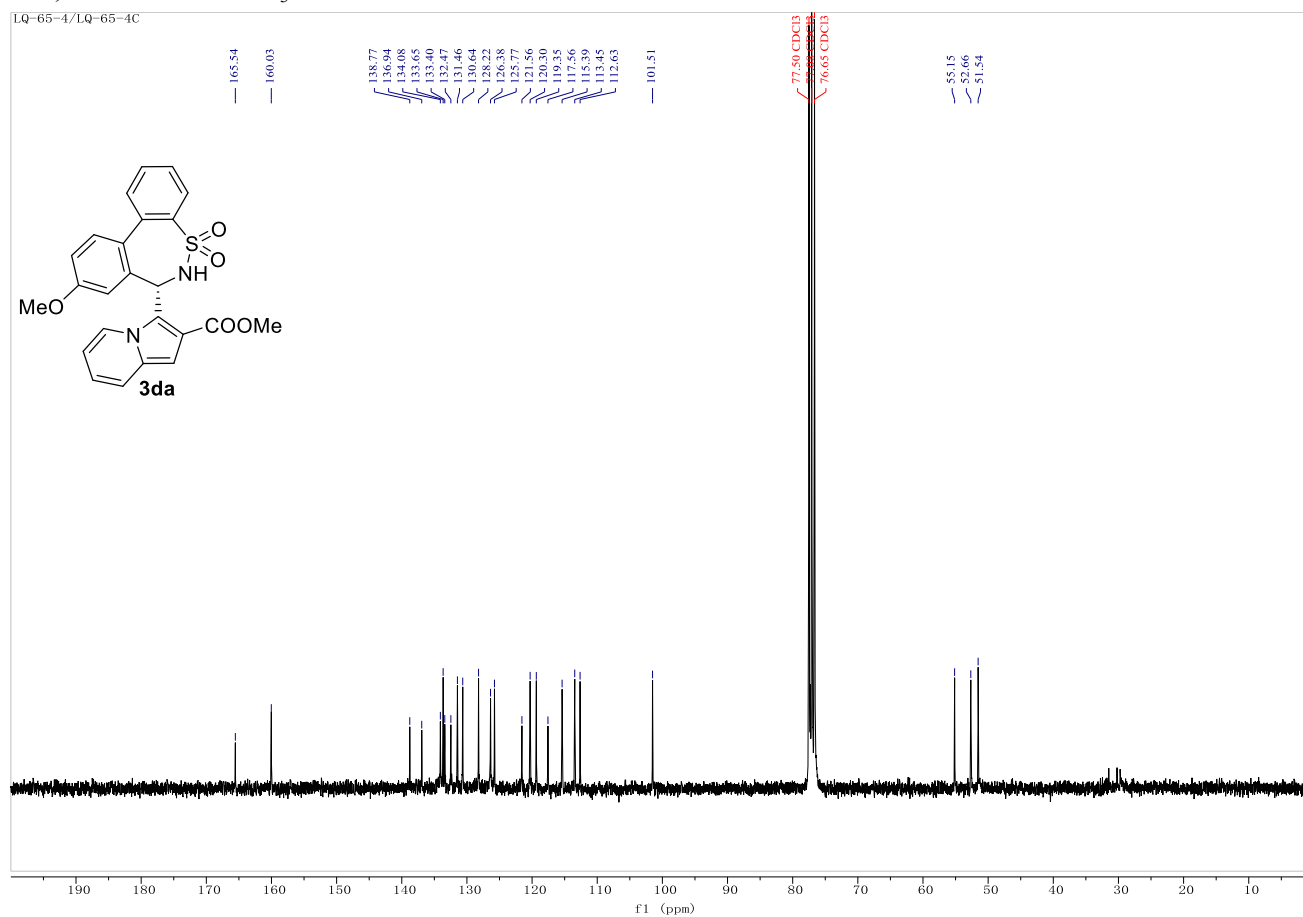

**3ea**,  $^1\text{H}$ -NMR in  $\text{CDCl}_3$

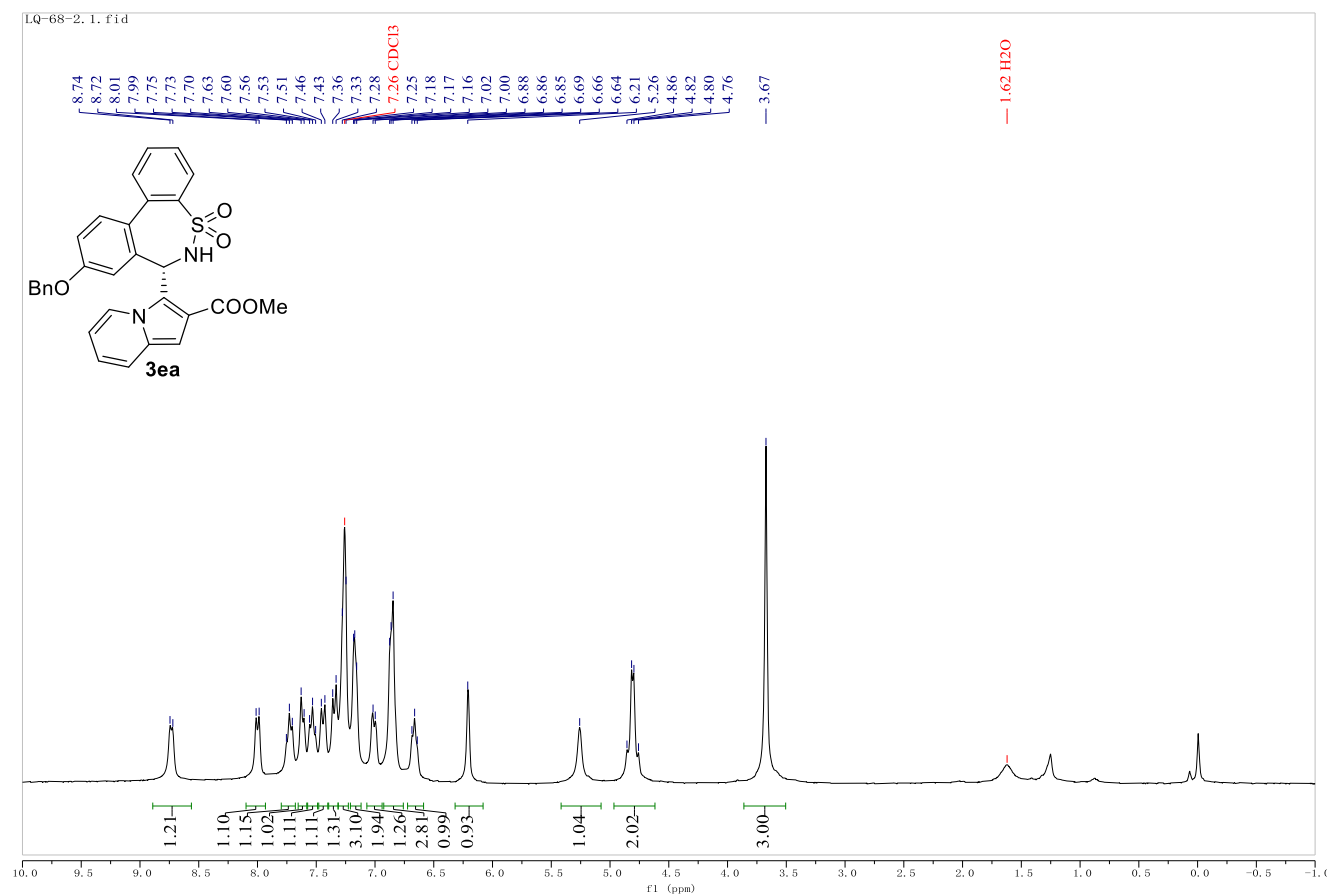

### 3ea, <sup>13</sup>C-NMR in CDCl<sub>3</sub>

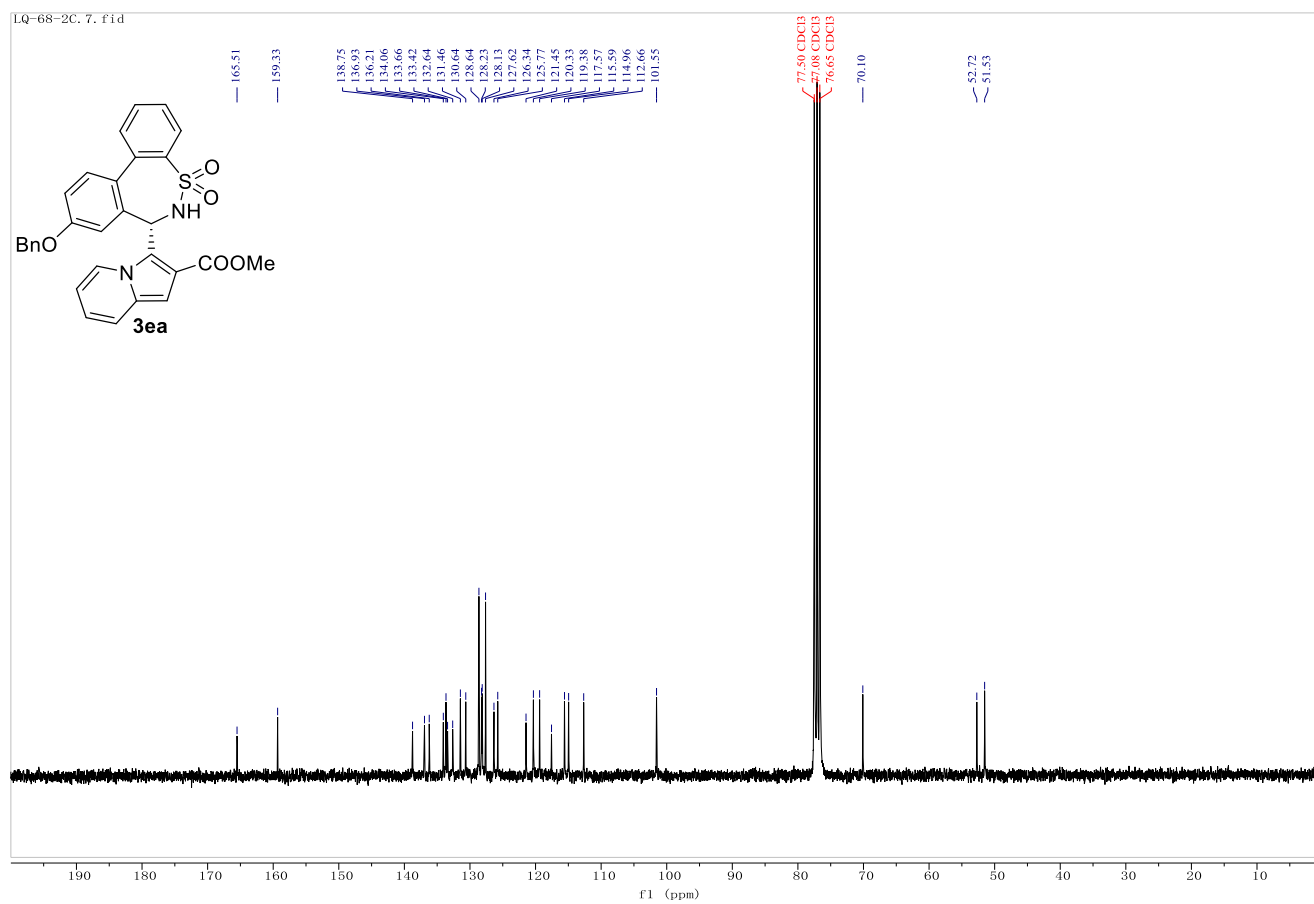

### 3fa, <sup>1</sup>H-NMR in CDCl<sub>3</sub>

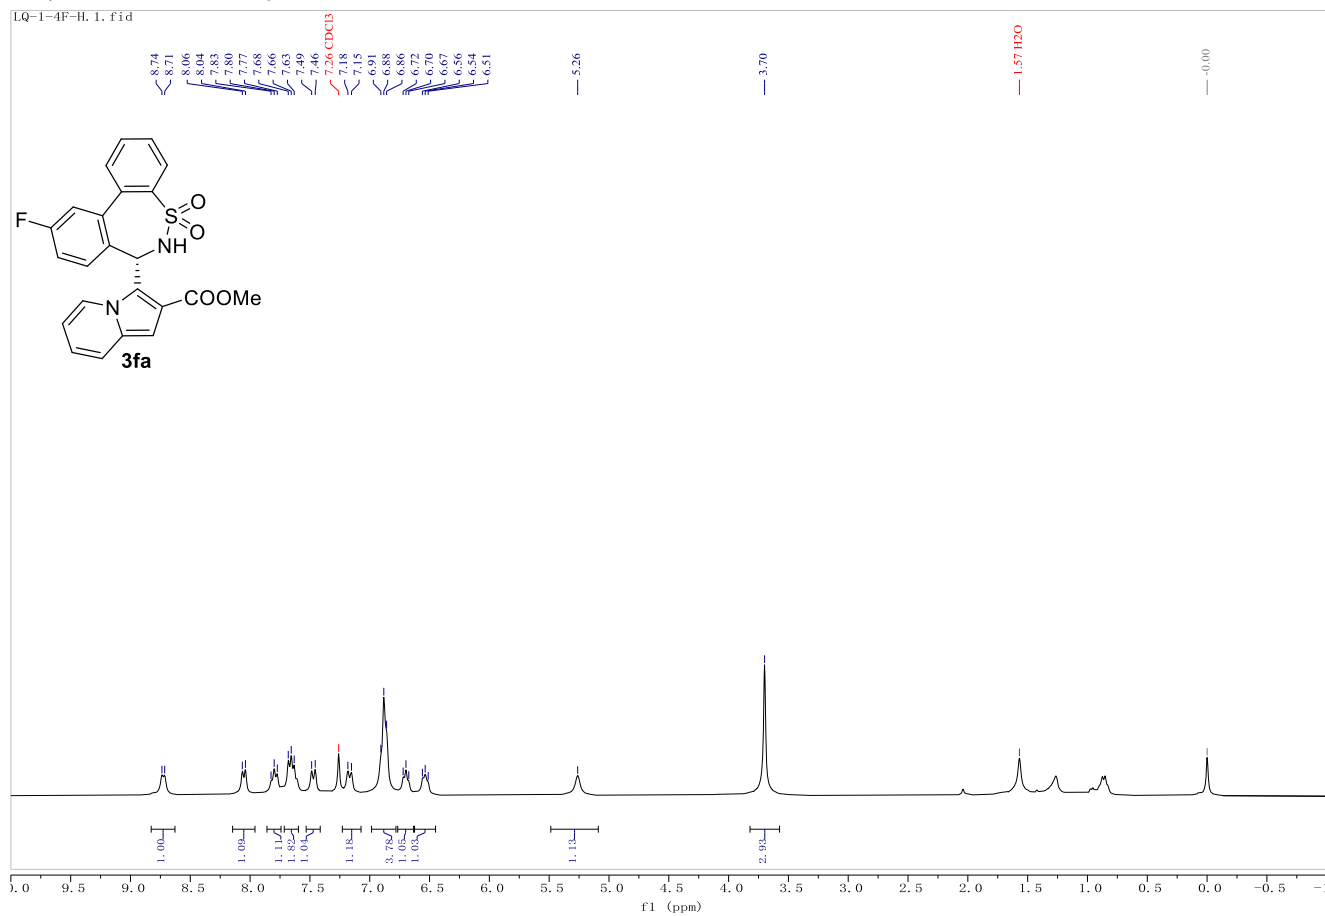

### 3fa, $^{13}\text{C}$ -NMR in $\text{CDCl}_3$

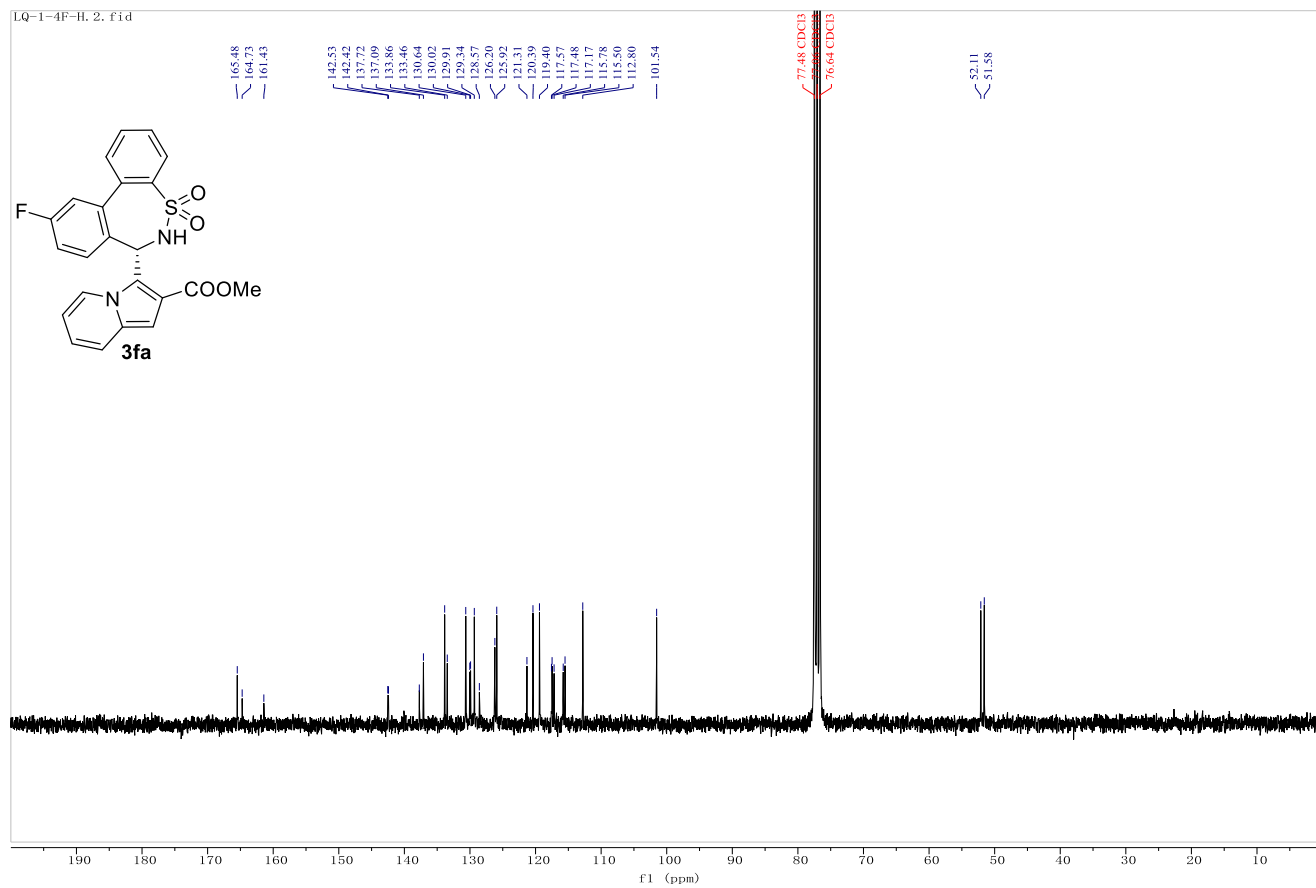

### 3fa, $^{19}\text{F}$ -NMR in $\text{CDCl}_3$

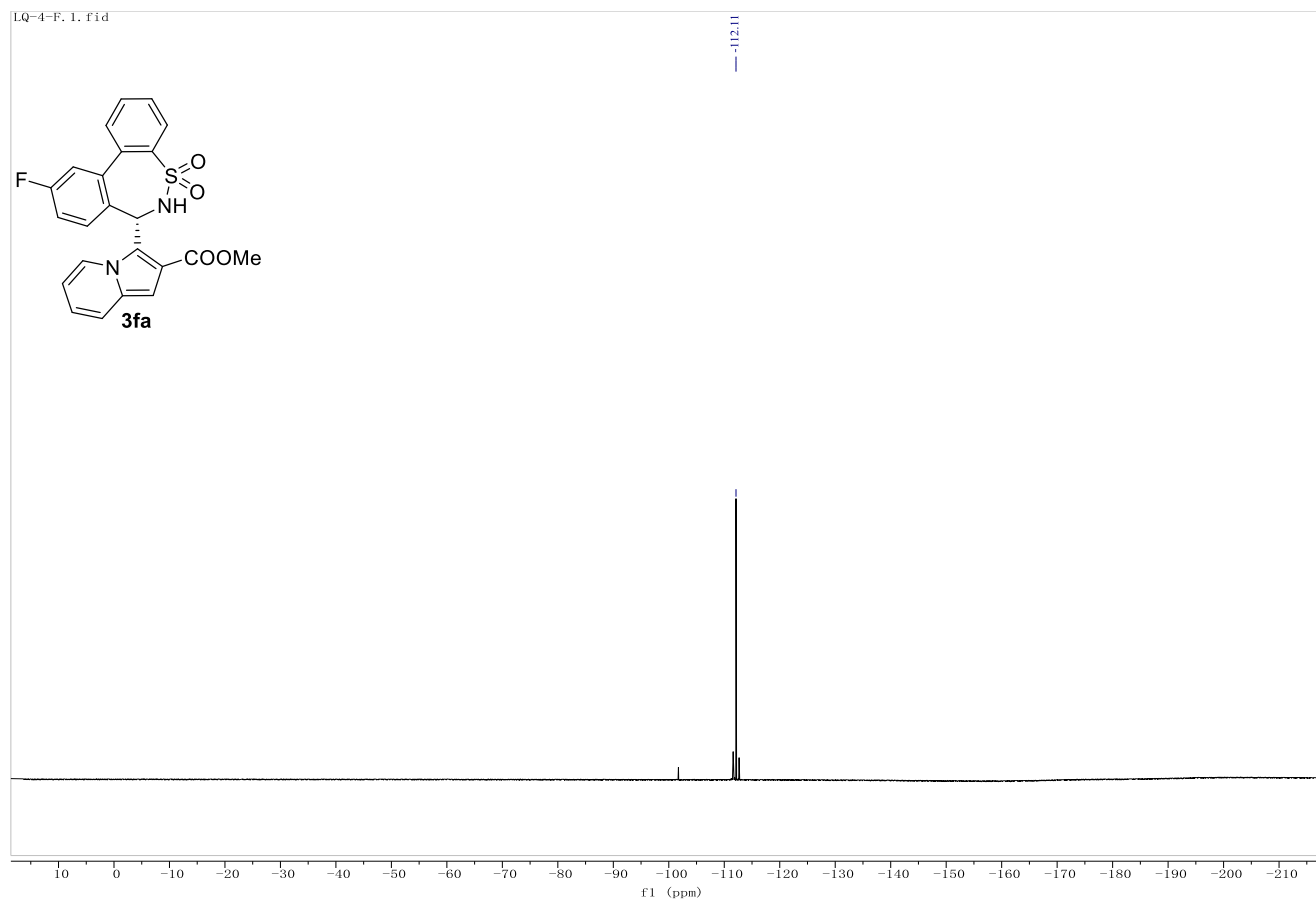

### 3ga, <sup>1</sup>H-NMR in CDCl<sub>3</sub>

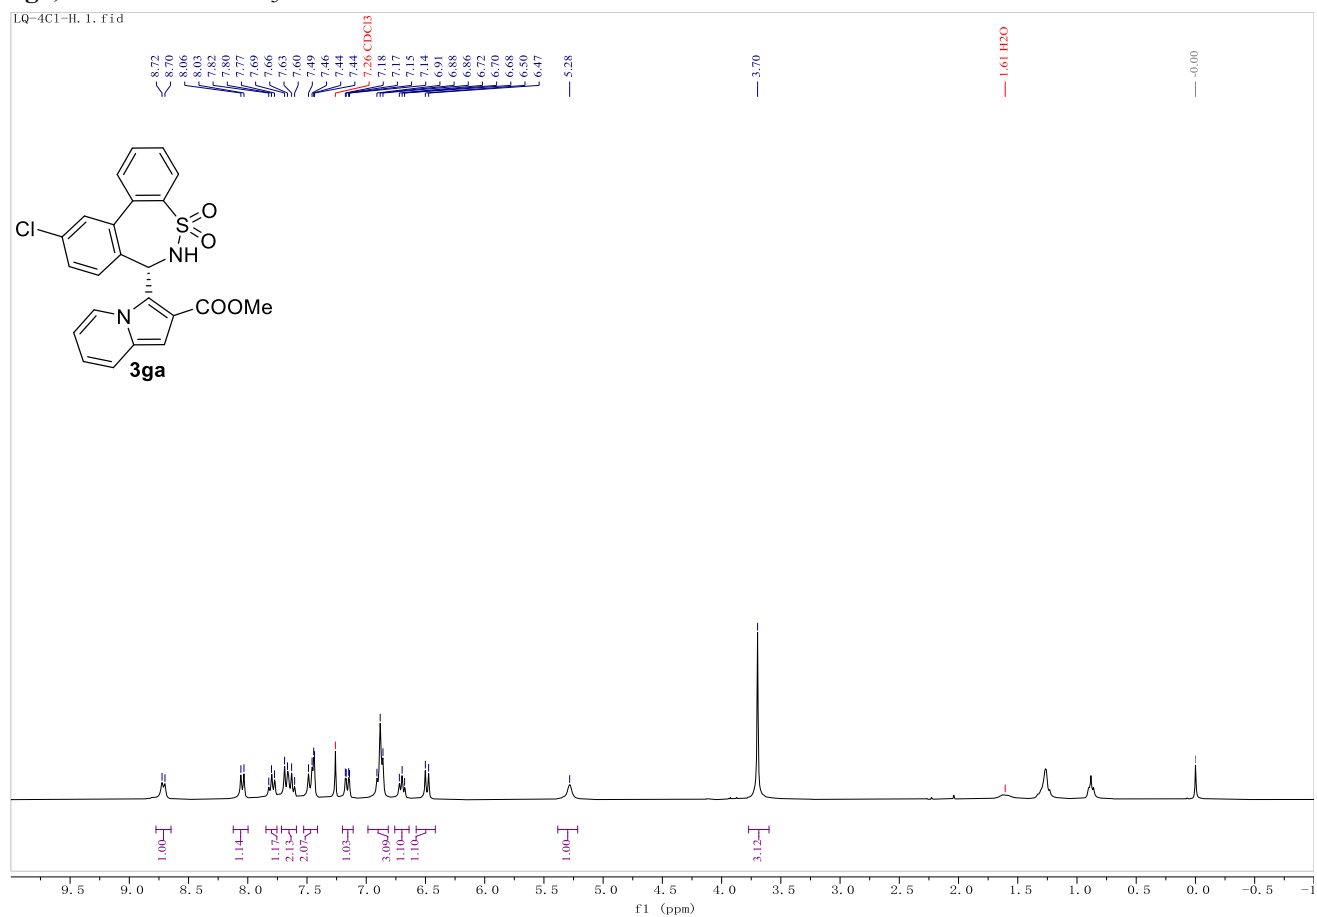

### 3ga, <sup>13</sup>C-NMR in CDCl<sub>3</sub>

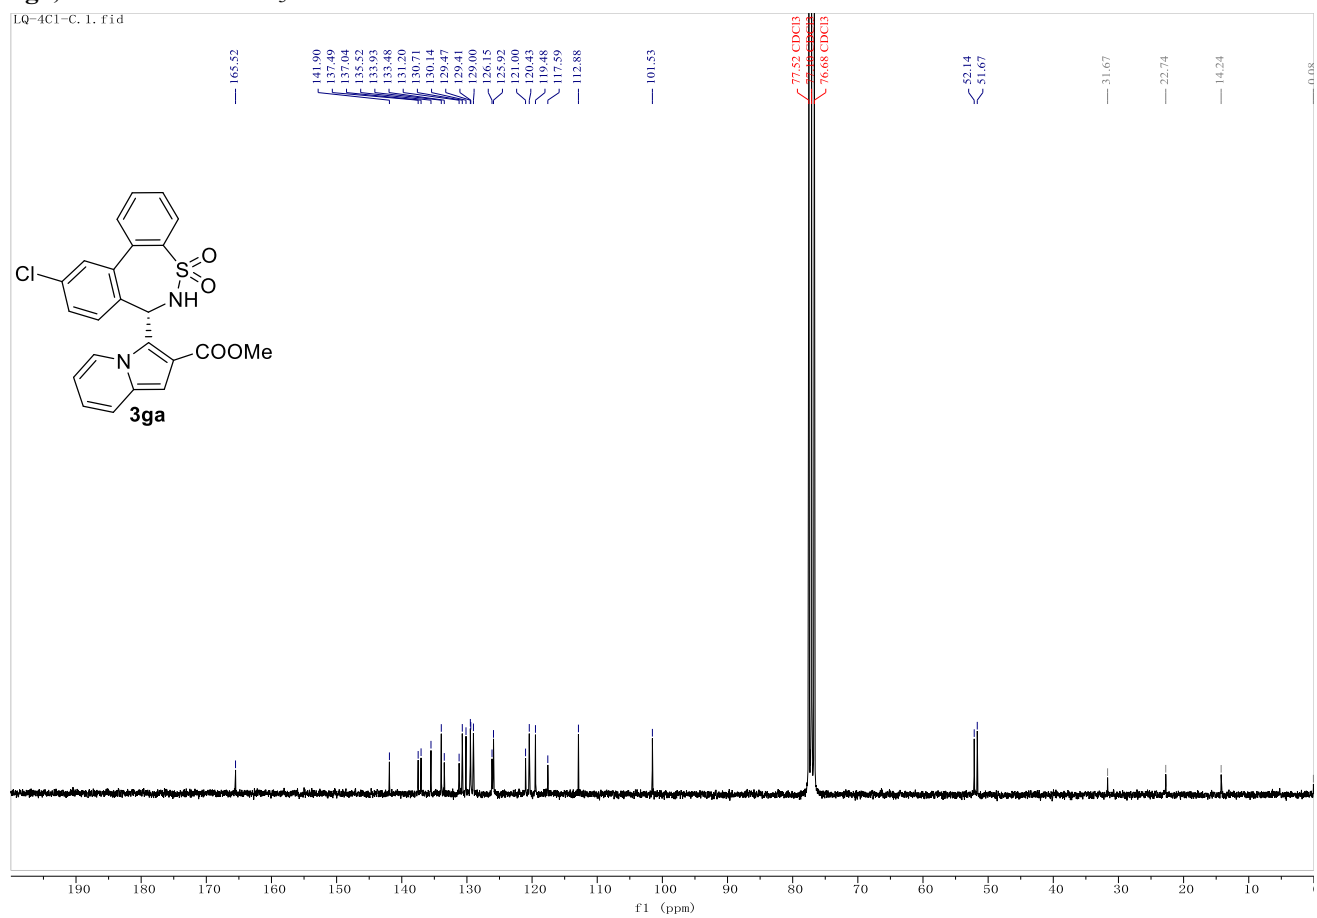

### 3ha, $^1\text{H-NMR}$ in $\text{CDCl}_3$

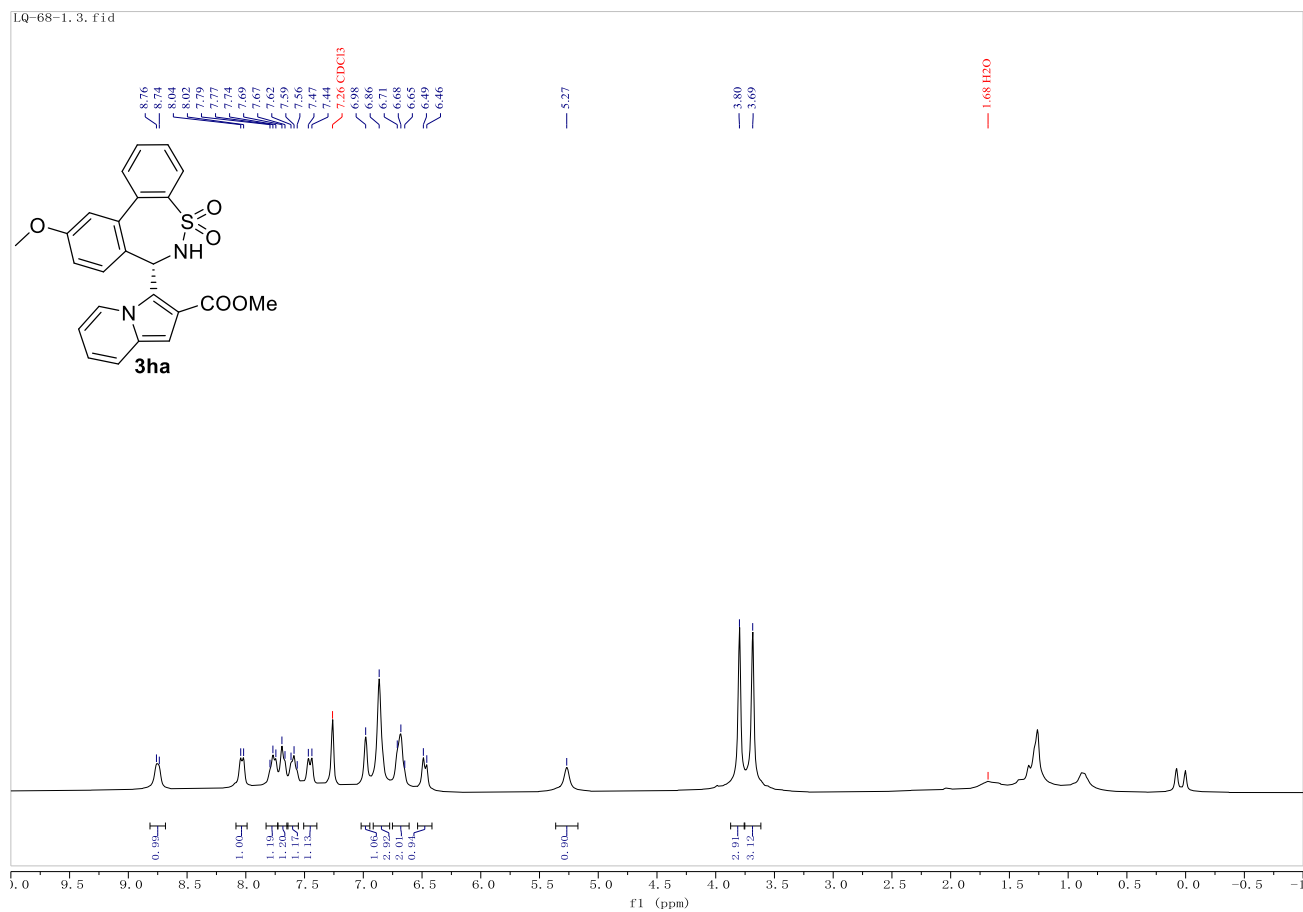

### 3ha, $^{13}\text{C-NMR}$ in $\text{CDCl}_3$

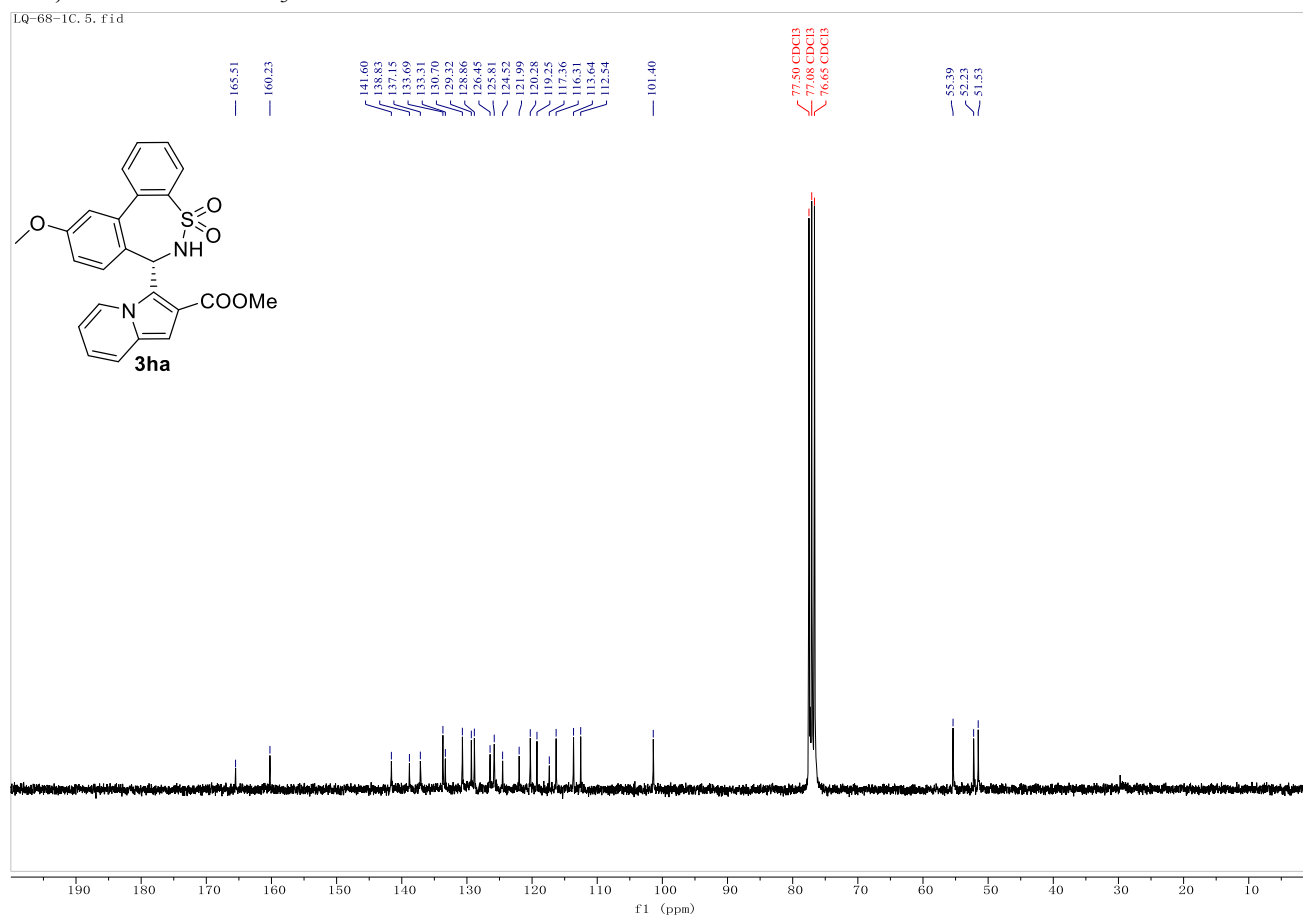

### 3ia, <sup>13</sup>C-NMR in CDCl<sub>3</sub>

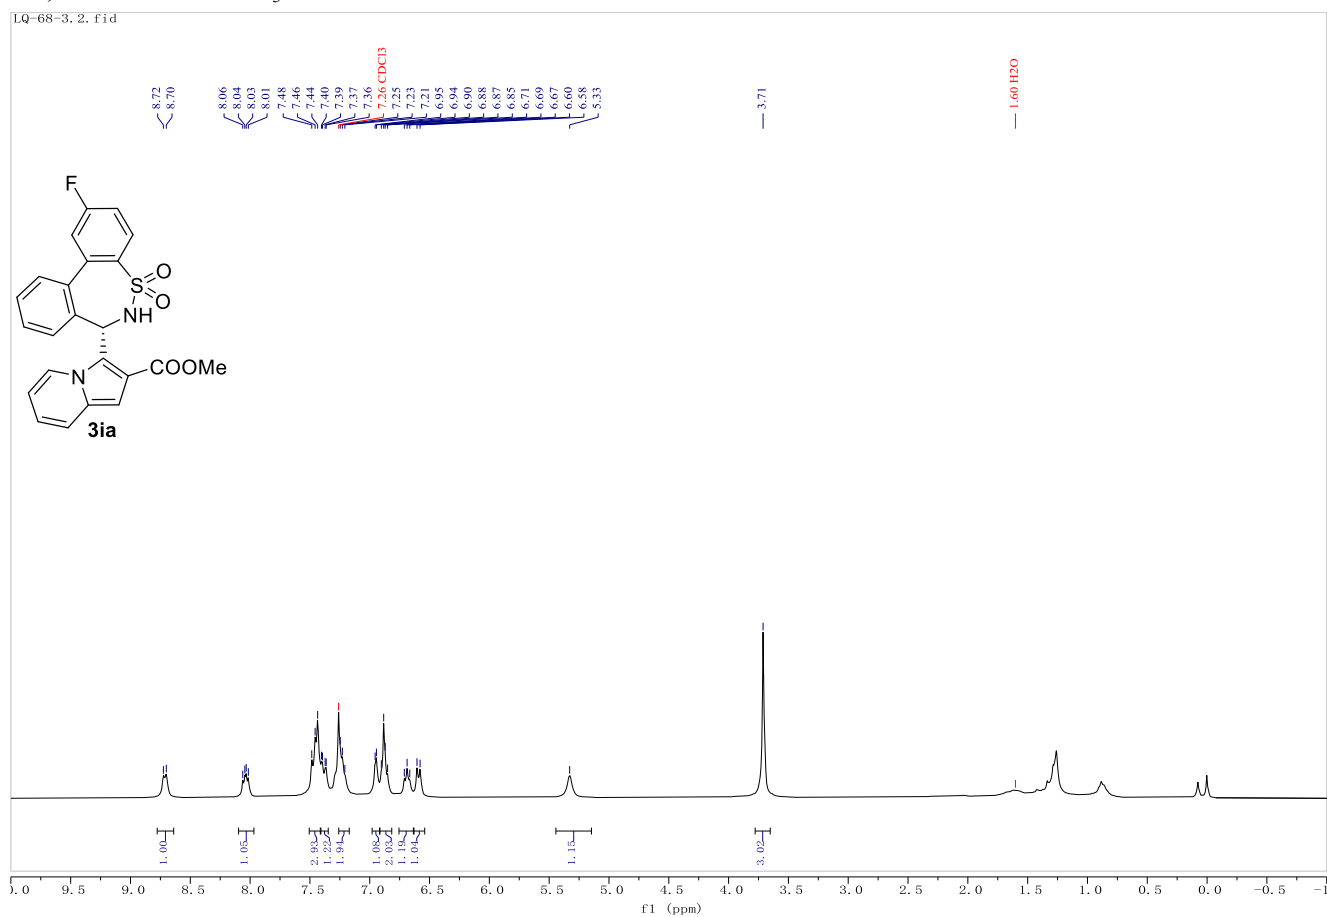

### 3ia, <sup>13</sup>C-NMR in CDCl<sub>3</sub>

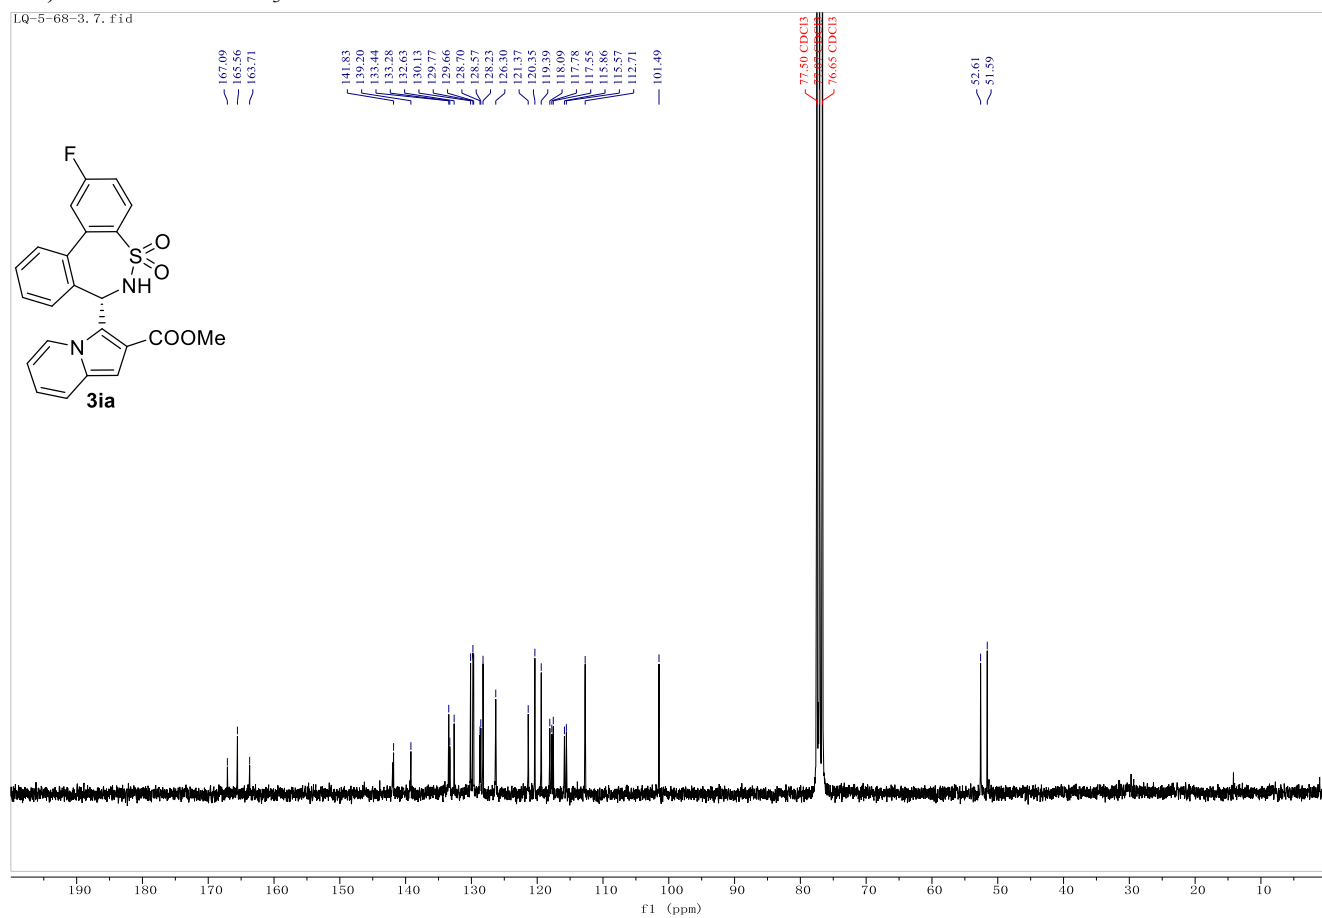

### 3ia, <sup>13</sup>C-NMR in CDCl<sub>3</sub>

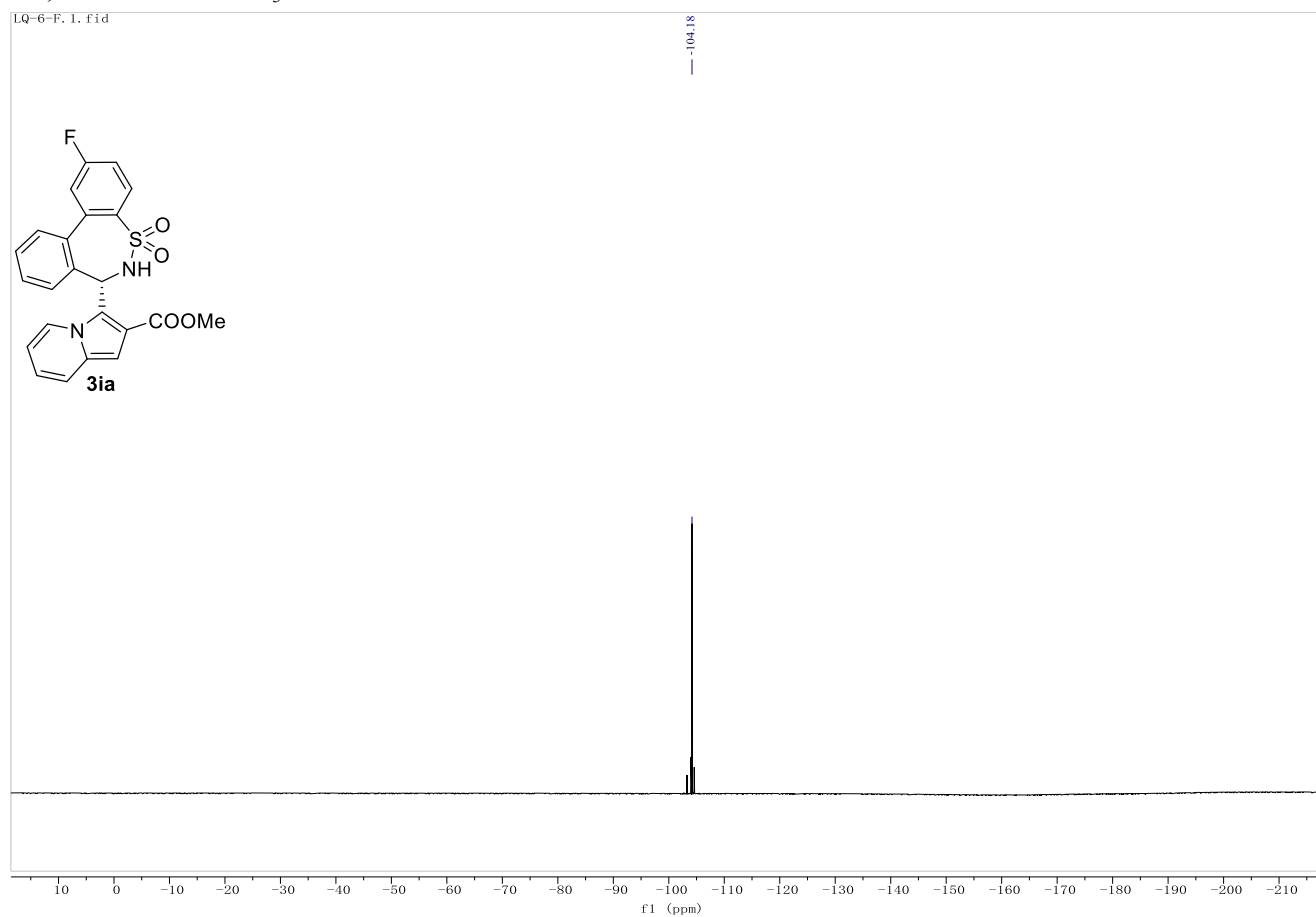

### 3ja, <sup>1</sup>H-NMR in CDCl<sub>3</sub>

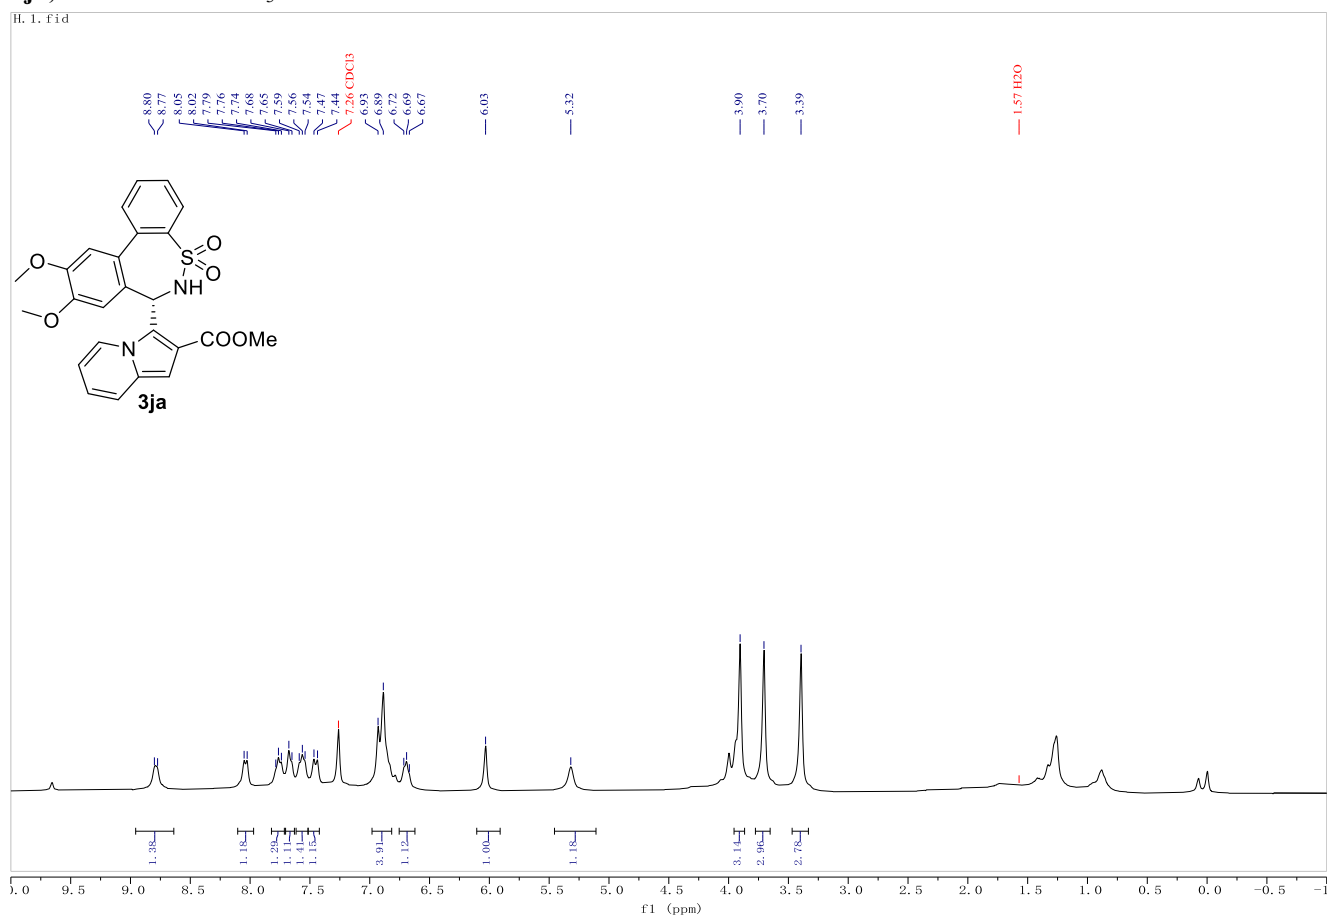



### 3ja, <sup>13</sup>C-NMR in CDCl<sub>3</sub>

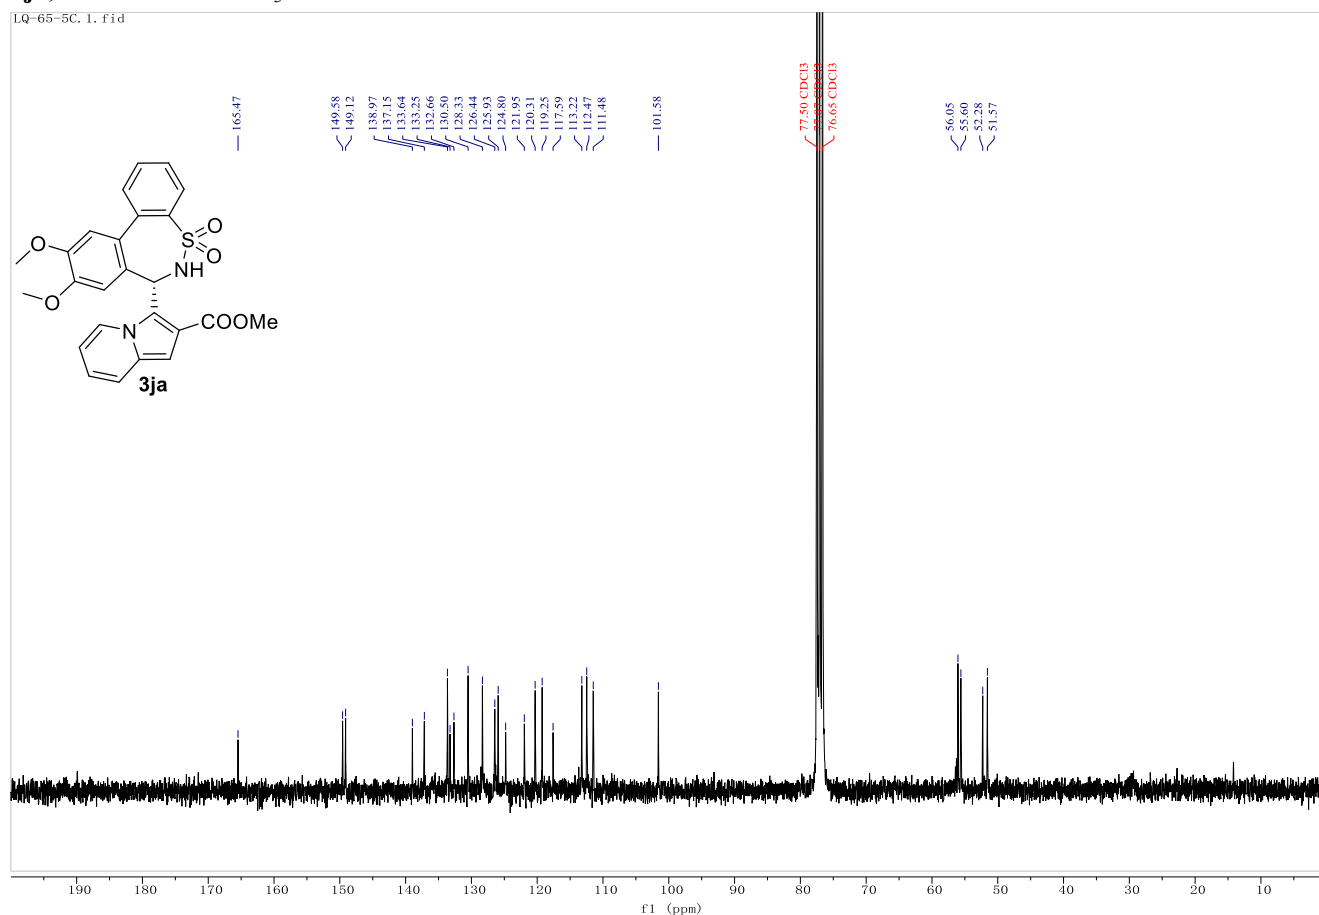

### 4aa, <sup>1</sup>H-NMR in CDCl<sub>3</sub>

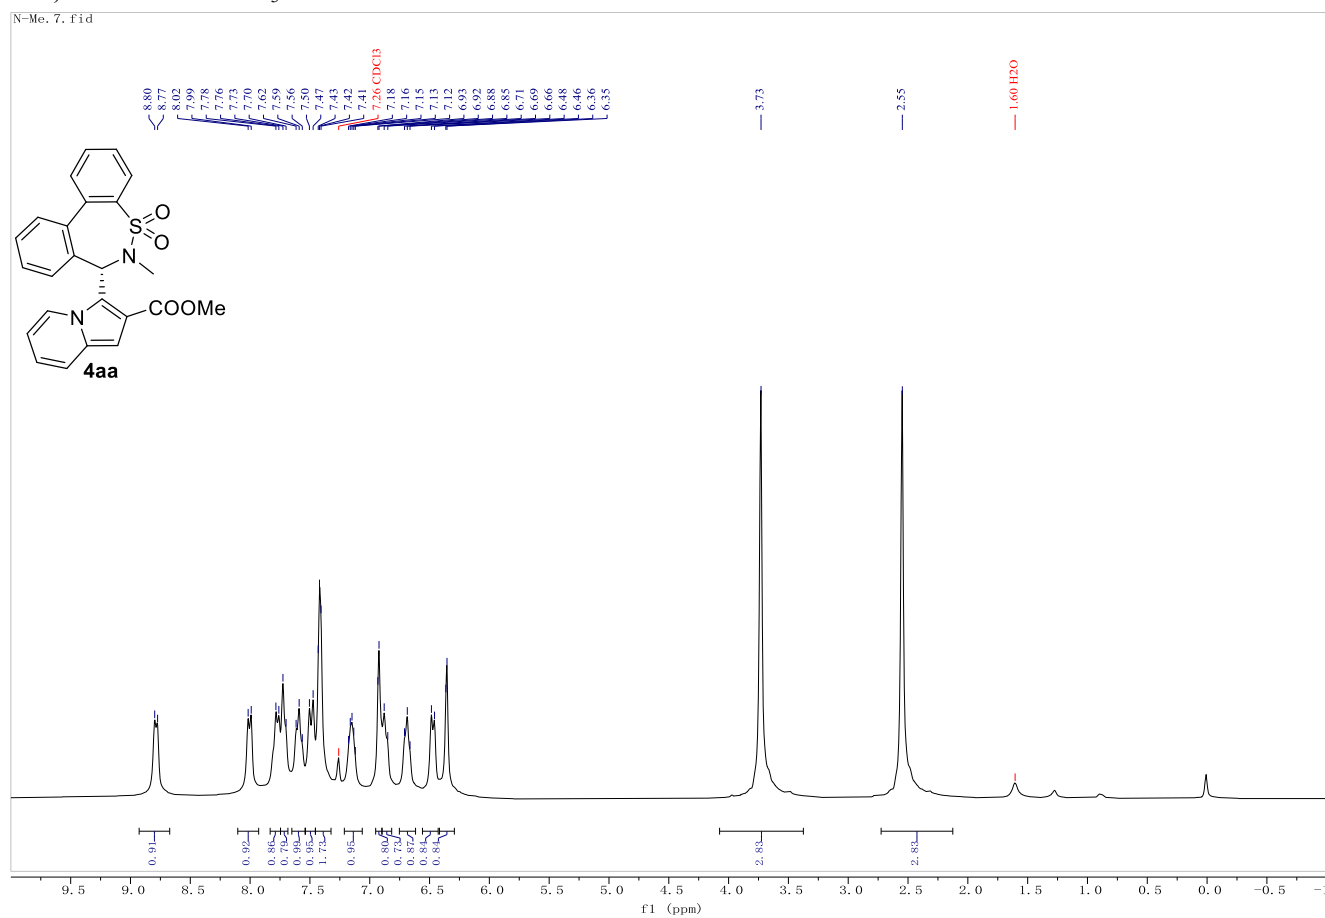

**4aa**,  $^{13}\text{C}$ -NMR in  $\text{CDCl}_3$

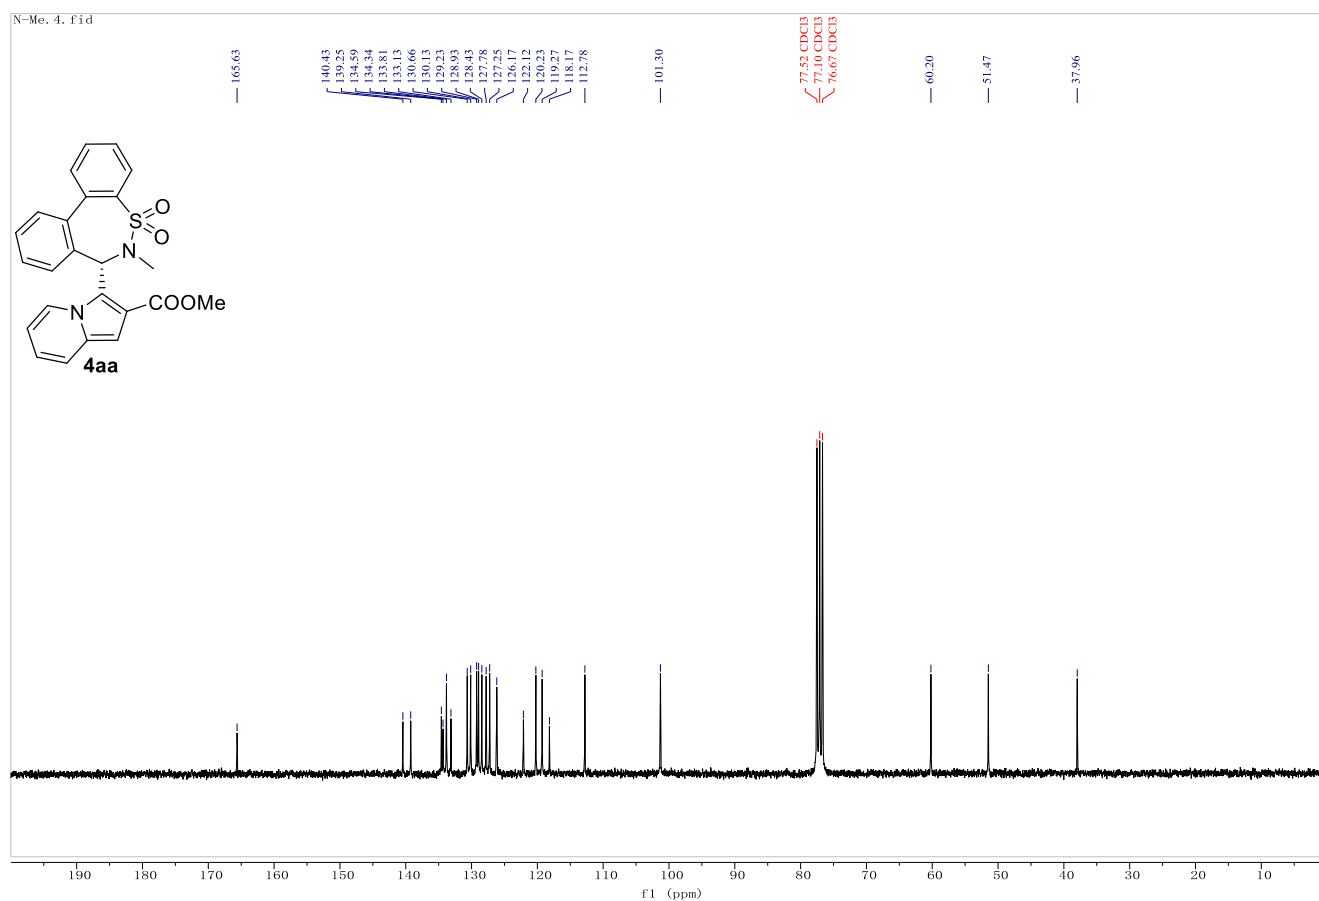

**4ab**,  $^1\text{H}$ -NMR in  $\text{CDCl}_3$

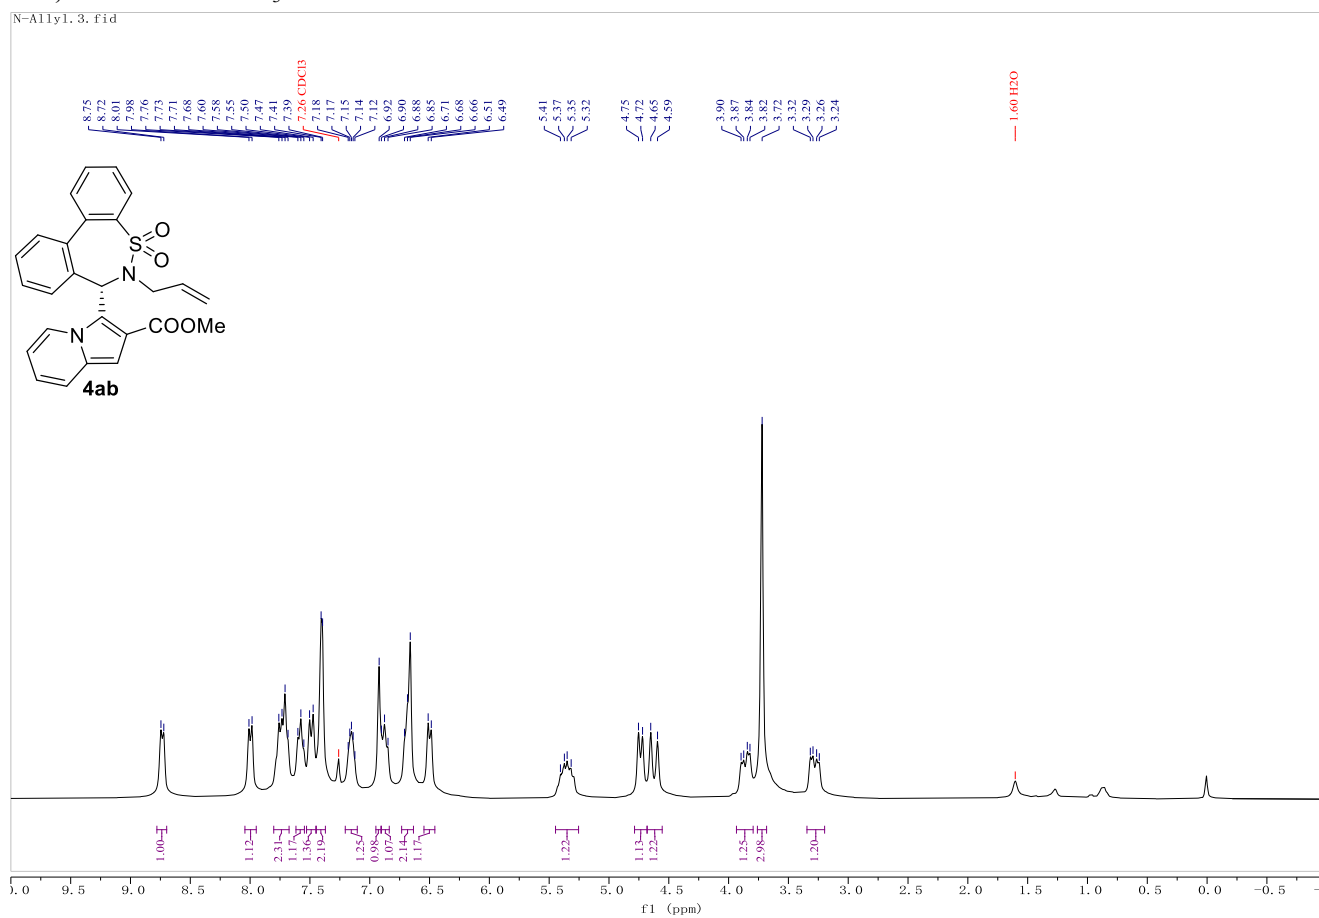

### 4ab, <sup>13</sup>C-NMR in CDCl<sub>3</sub>

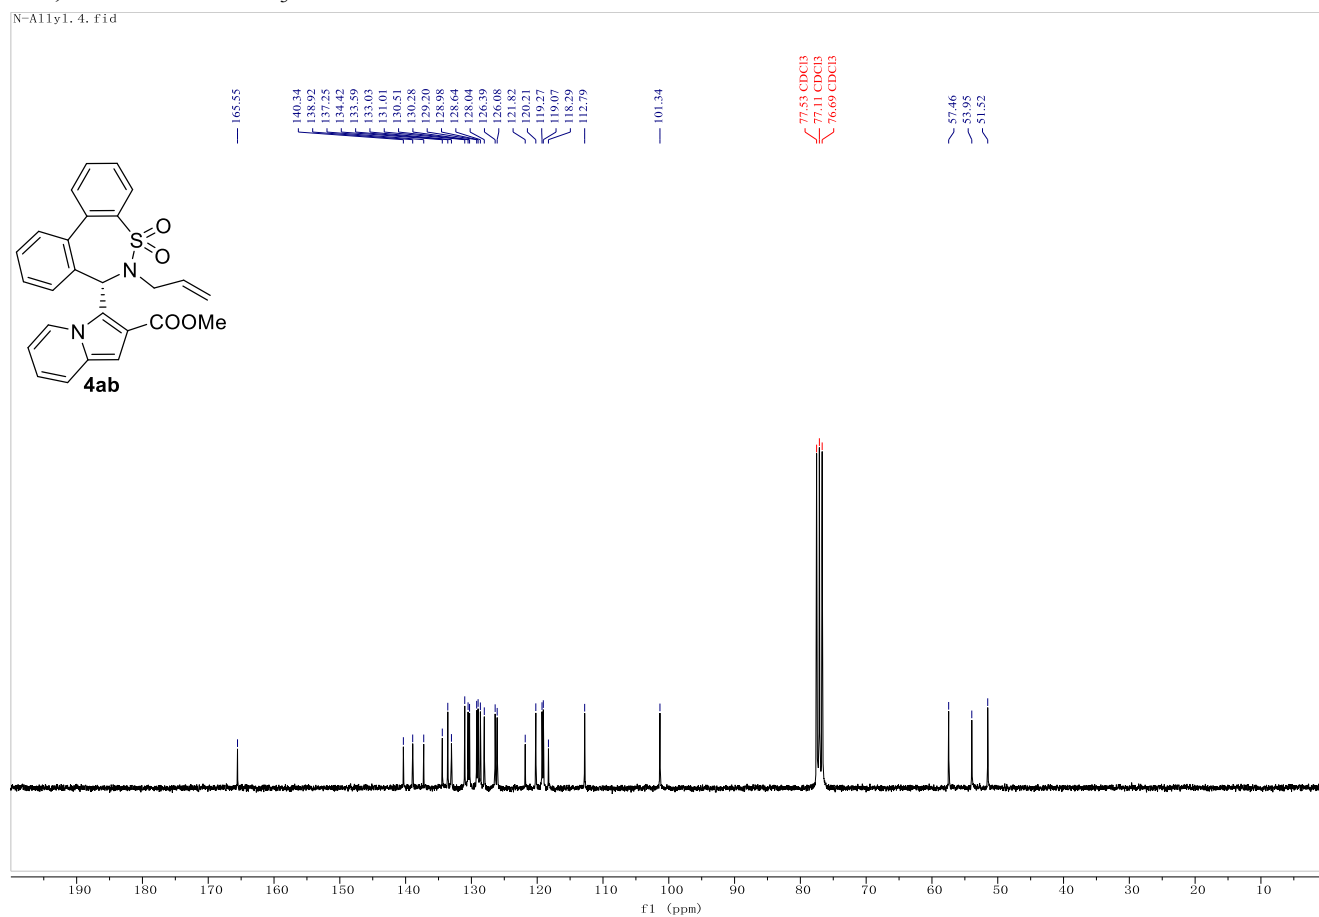

### 4ac, <sup>1</sup>H-NMR in CDCl<sub>3</sub>

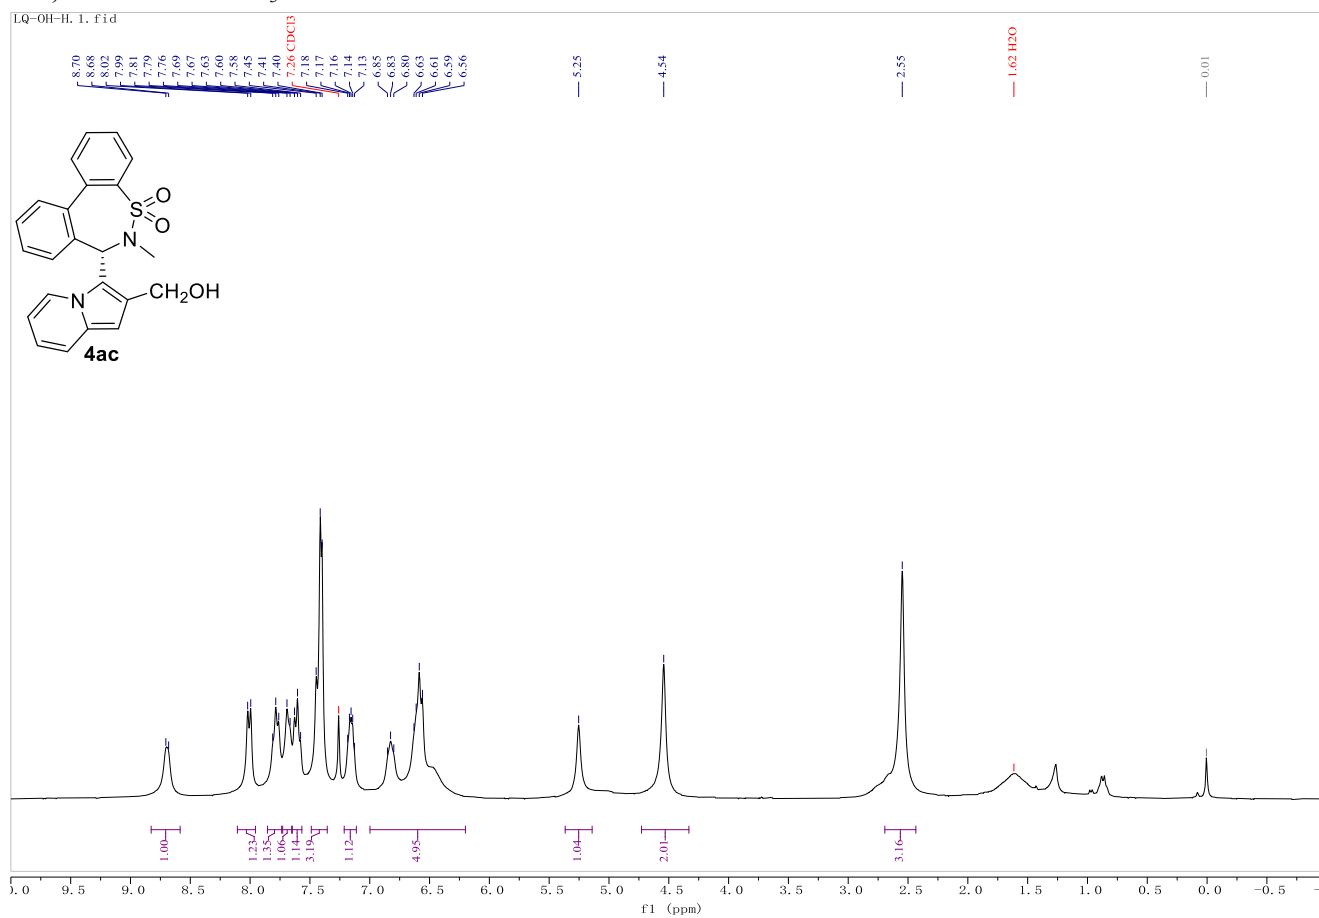

### 4ac, $^{13}\text{C}$ -NMR in $\text{CDCl}_3$

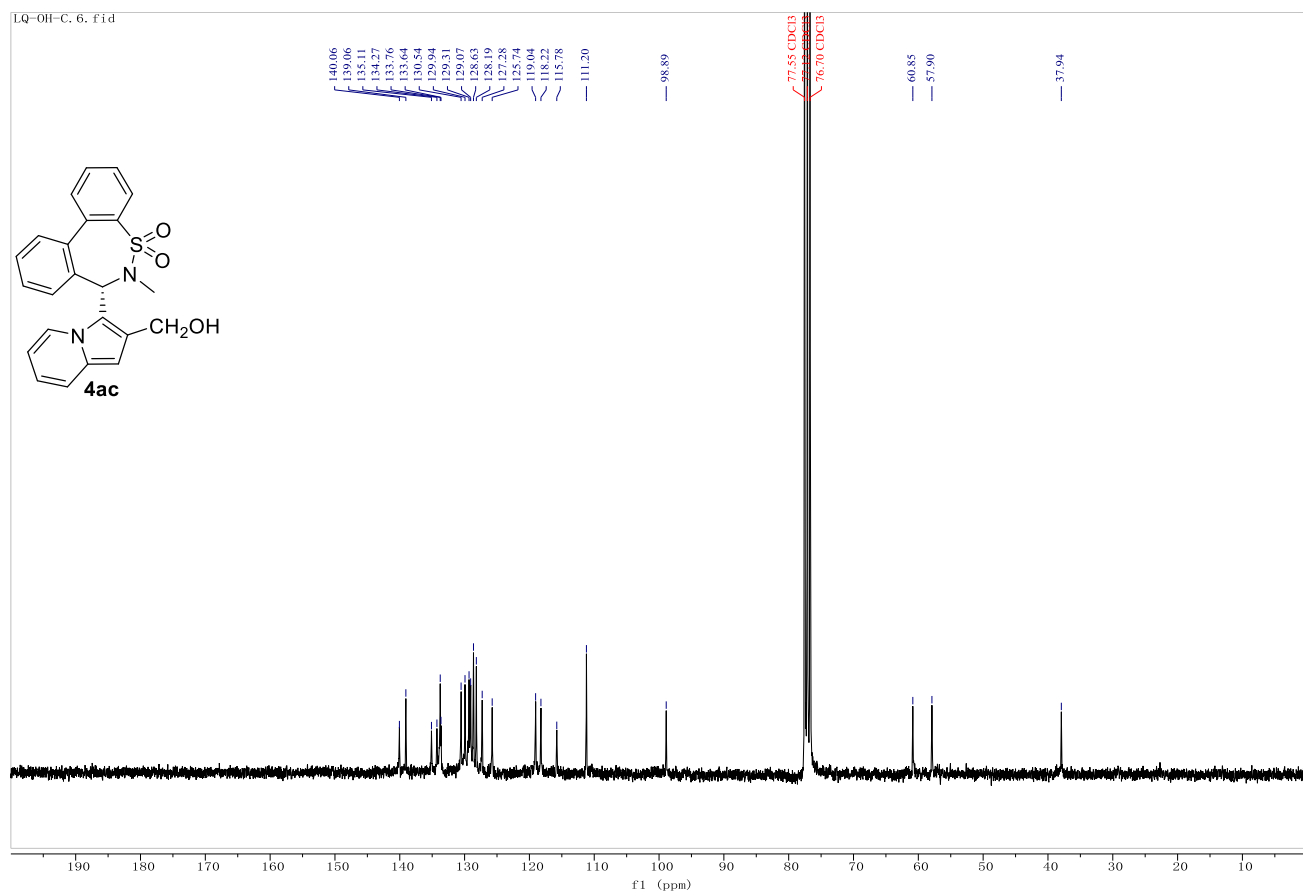

### 4ad, $^1\text{H}$ -NMR in $\text{CDCl}_3$

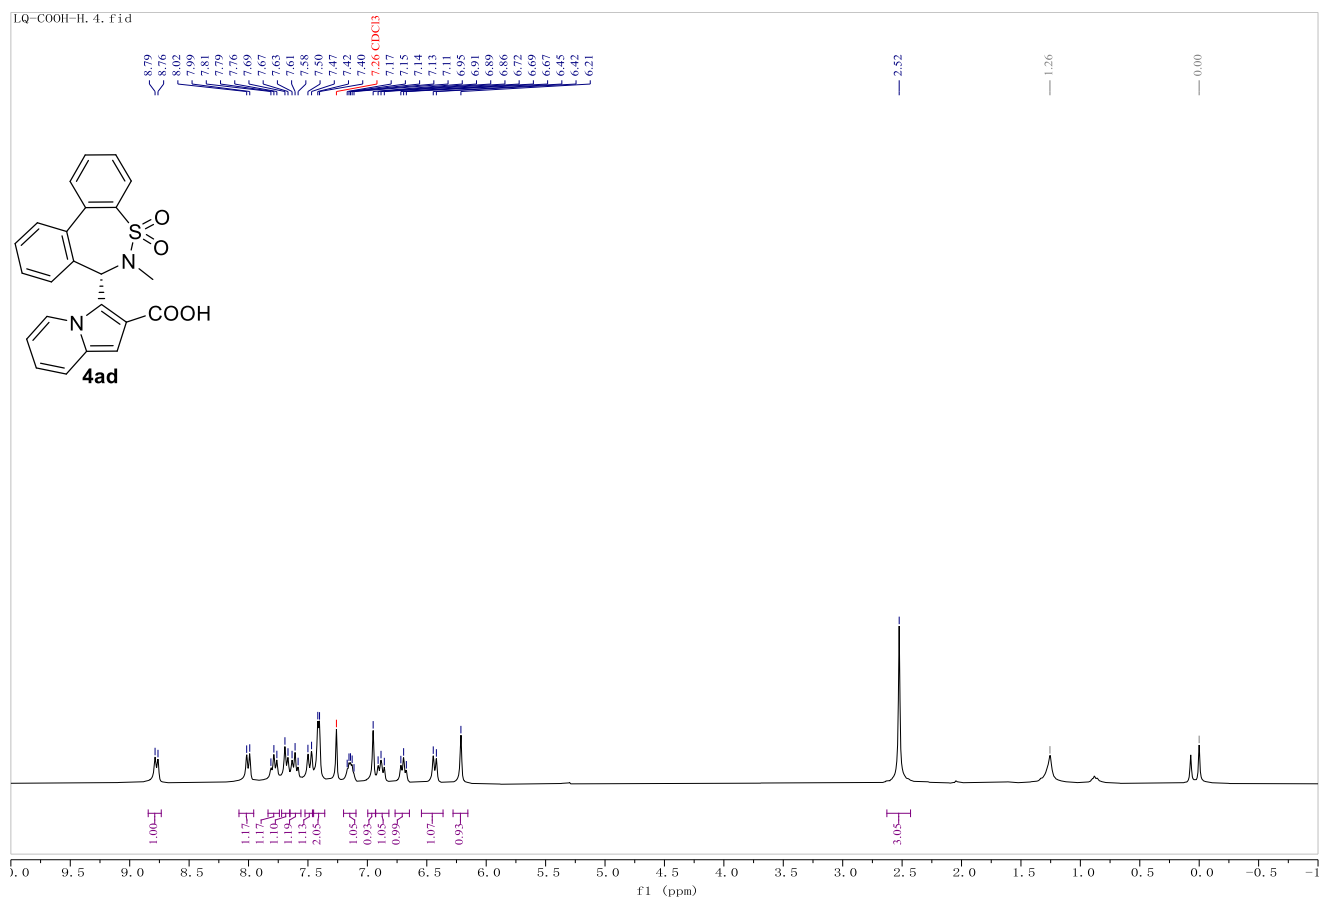

**4ad**,  $^{13}\text{C-NMR}$  in  $\text{CDCl}_3$

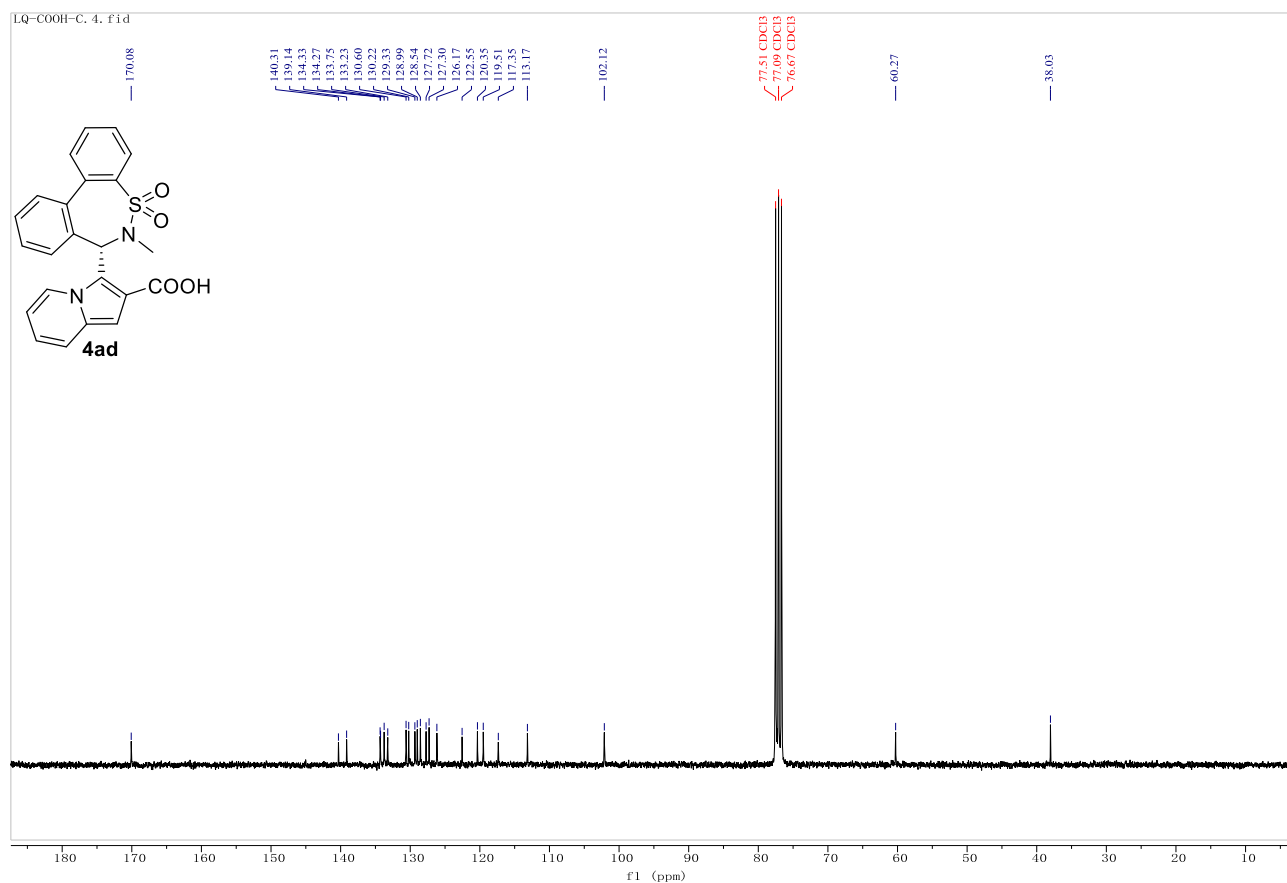

**4ae**,  $^1\text{H-NMR}$  in  $\text{CDCl}_3$

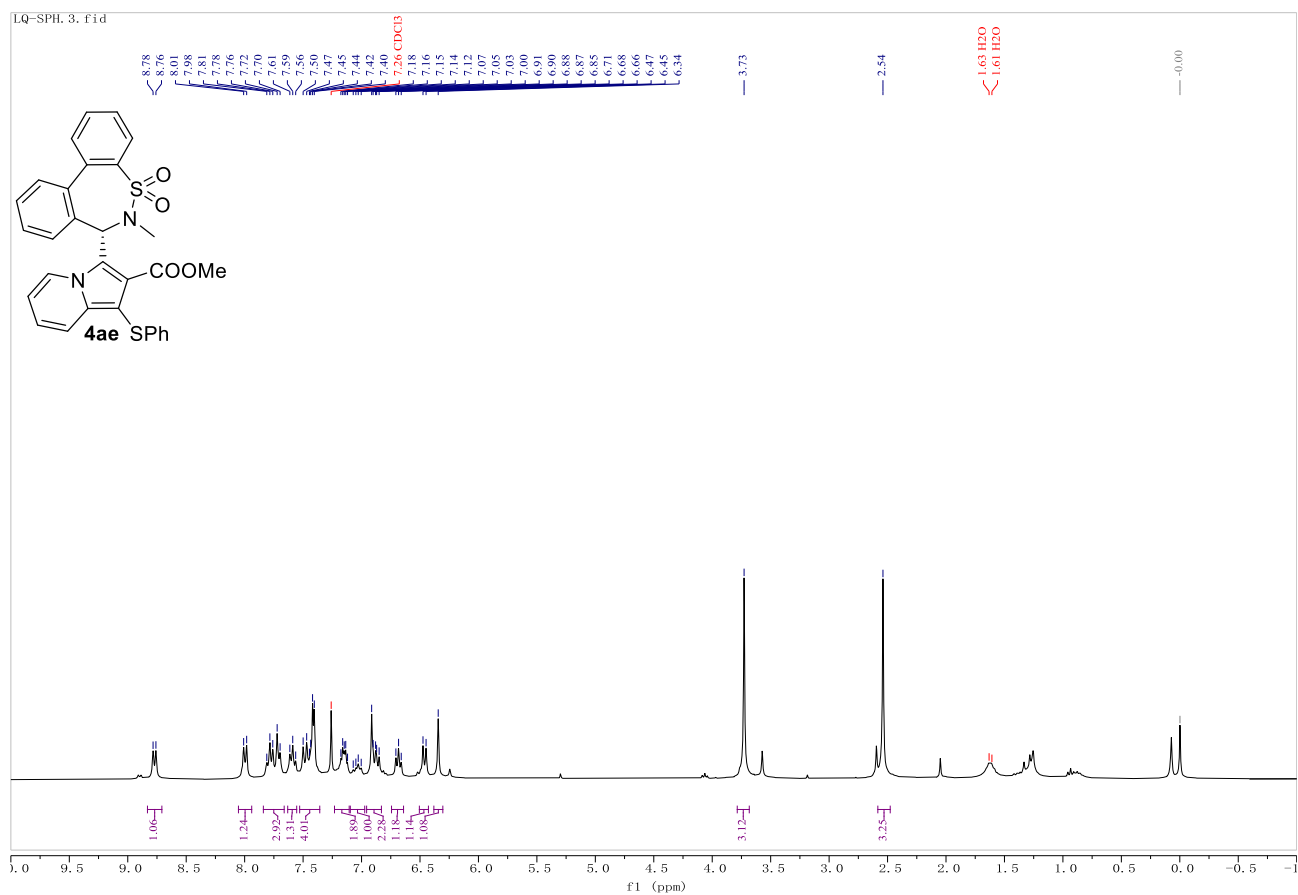

### 4ae, <sup>13</sup>C-NMR in CDCl<sub>3</sub>

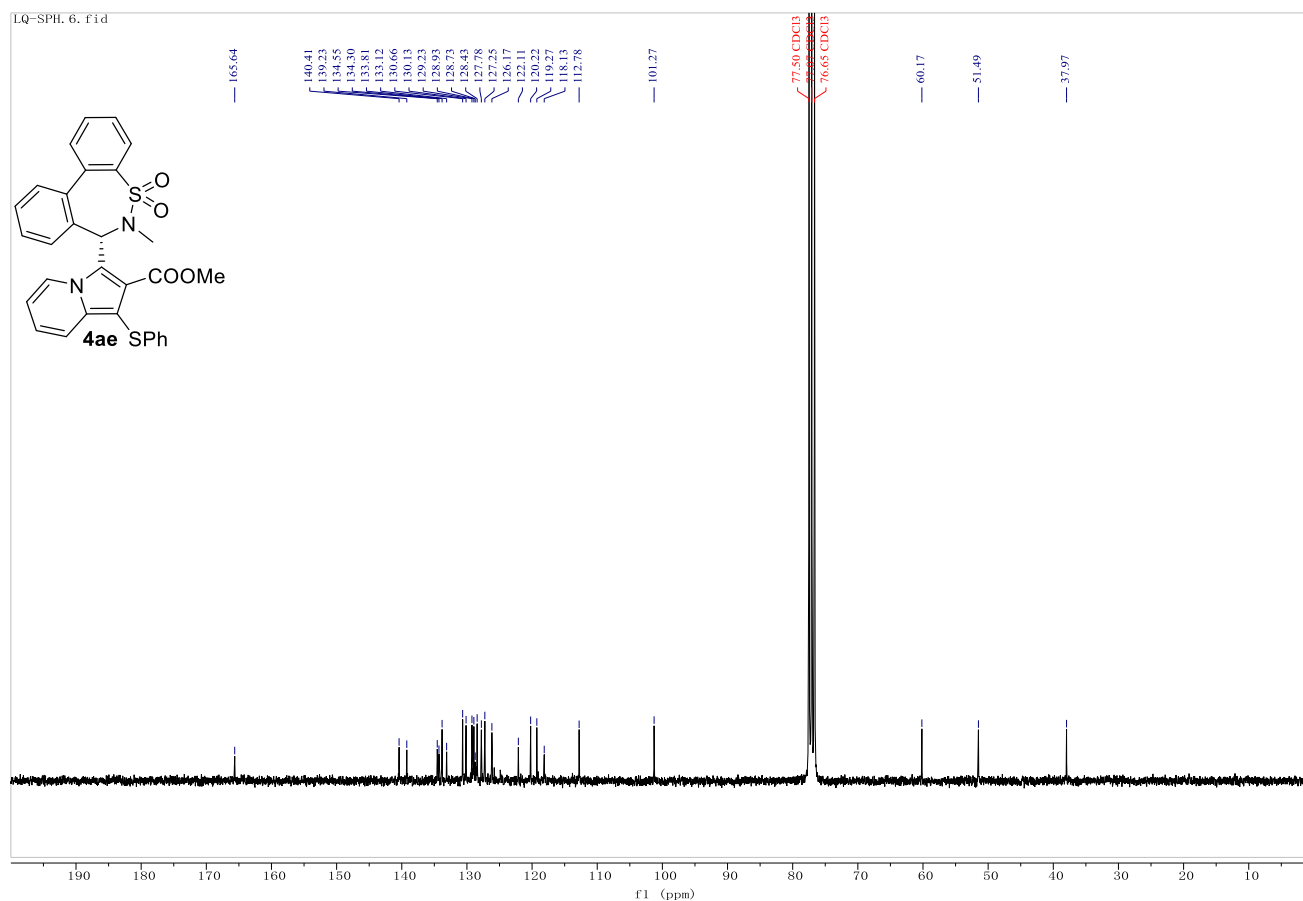

### 4af, <sup>1</sup>H-NMR in CDCl<sub>3</sub>

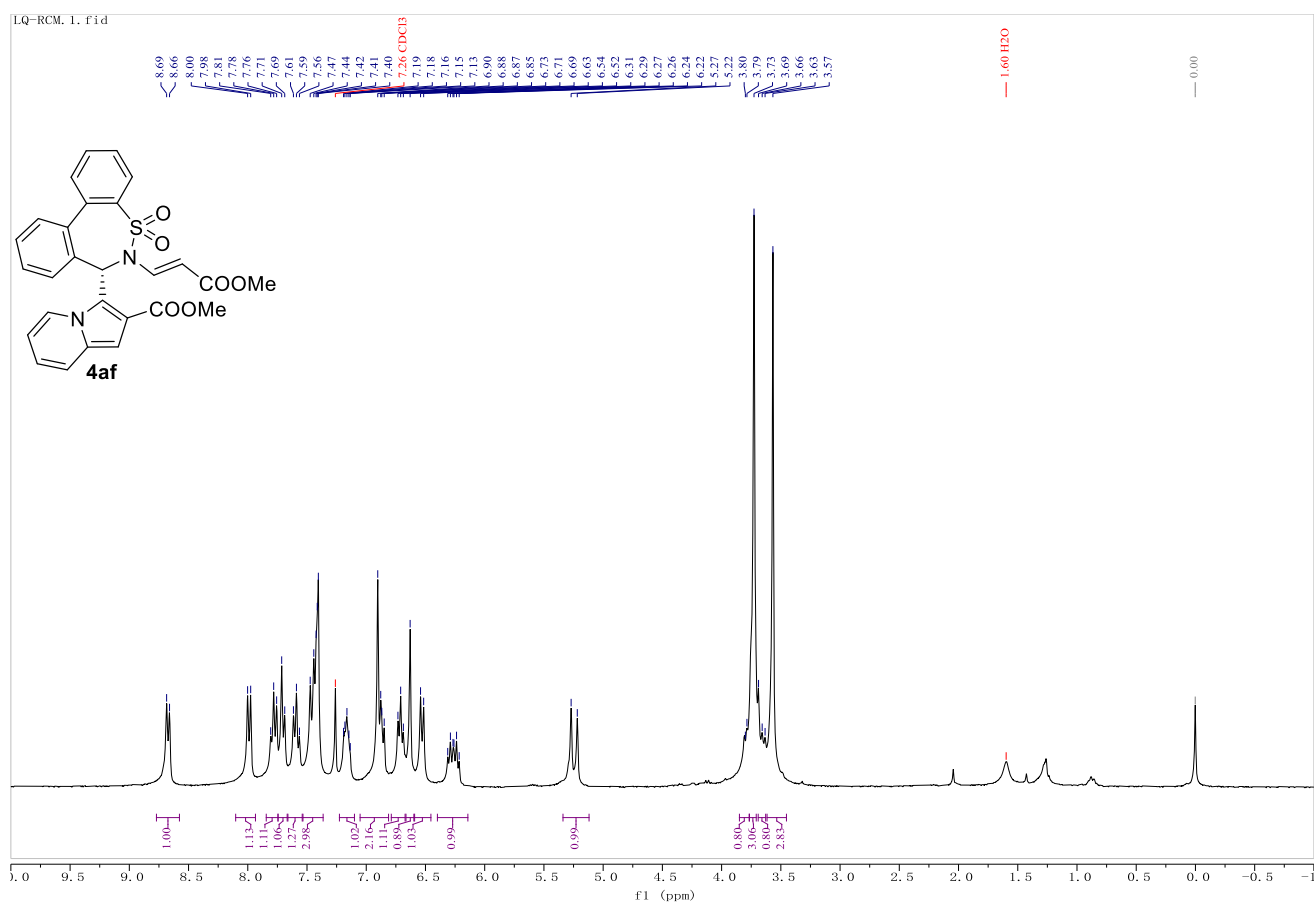

**4af**,  $^{13}\text{C}$ -NMR in  $\text{CDCl}_3$

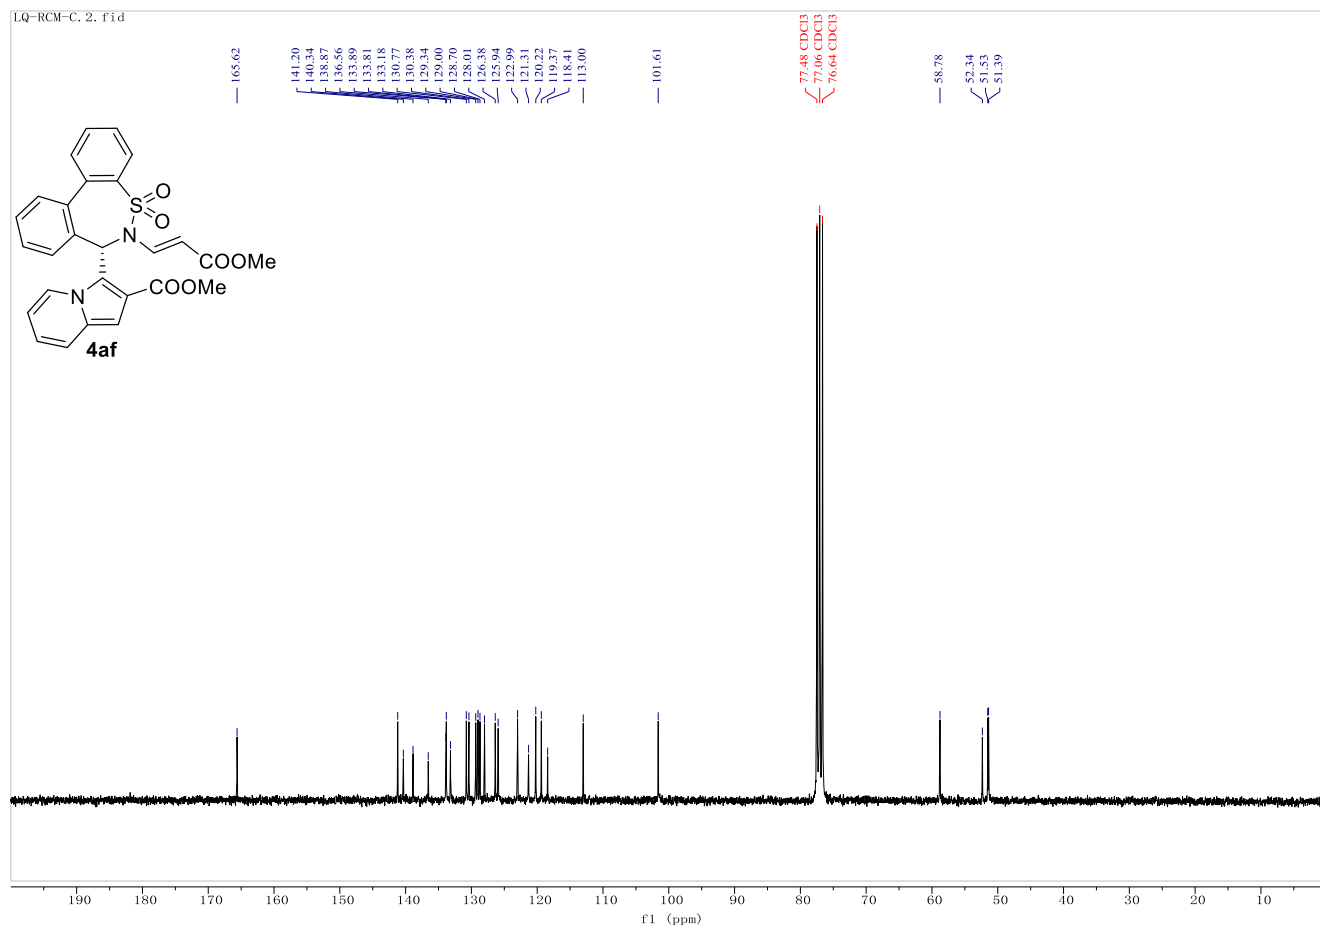

**6a**,  $^1\text{H}$ -NMR in  $\text{CDCl}_3$

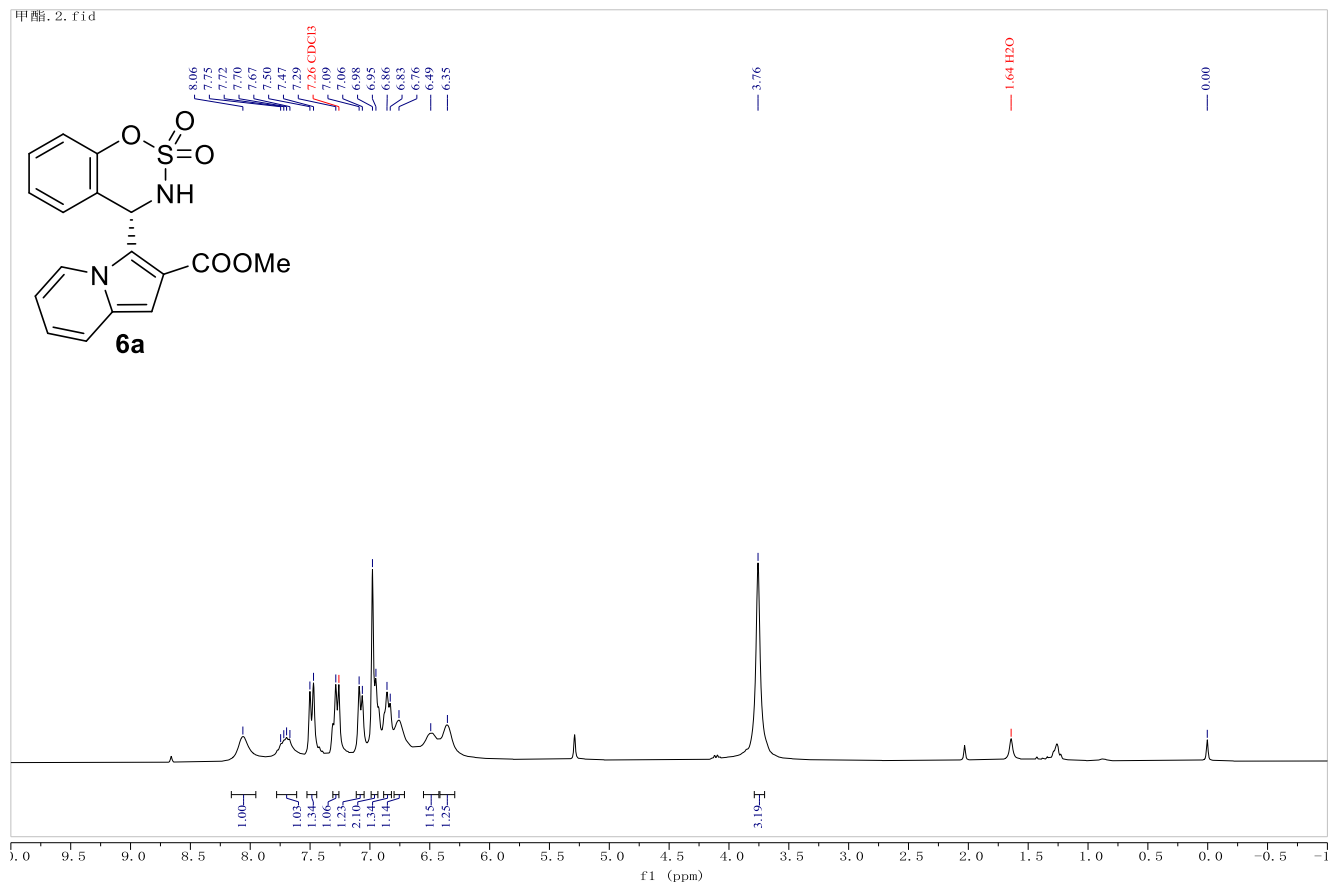

**6a**,  $^{13}\text{C}$ -NMR in  $\text{CDCl}_3$

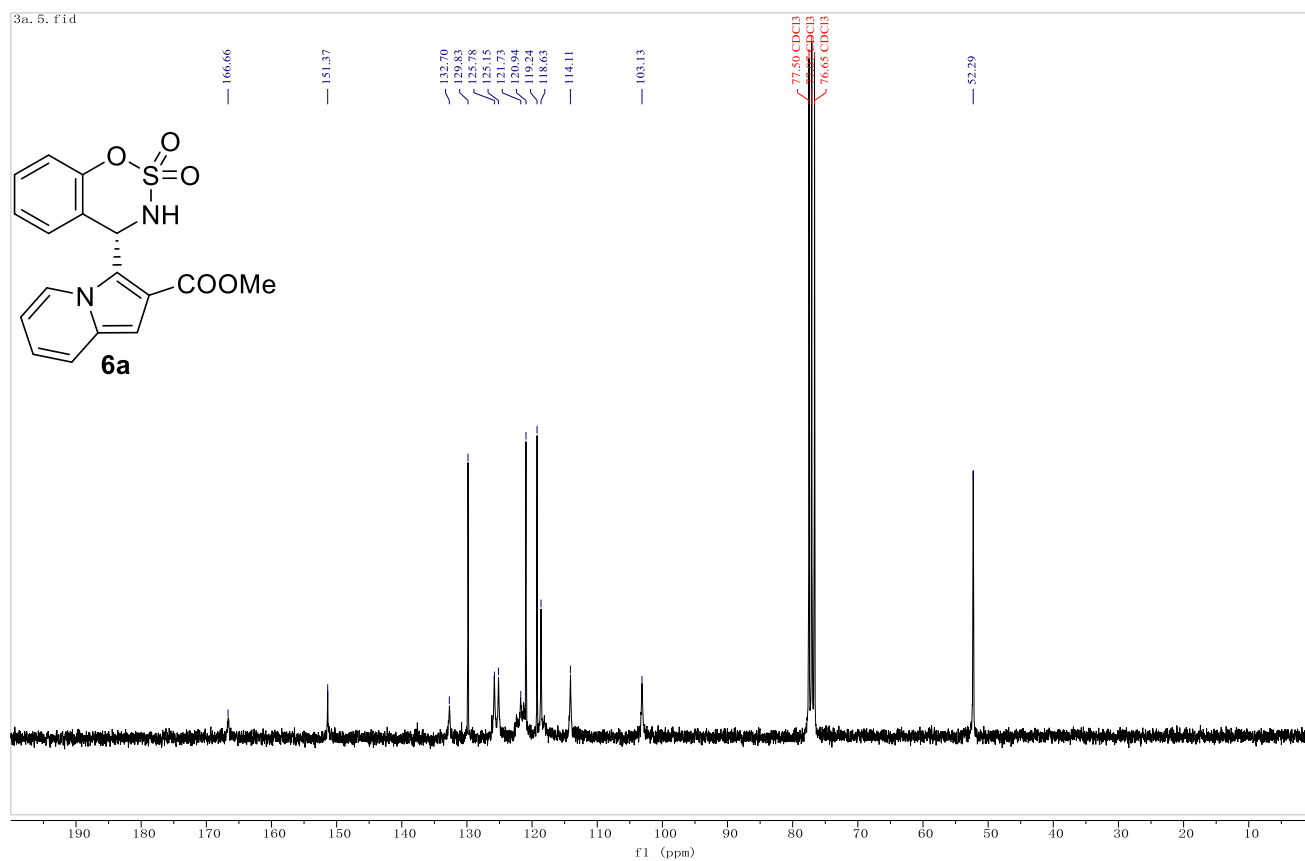

**6b**,  $^1\text{H}$ -NMR in  $\text{CDCl}_3$

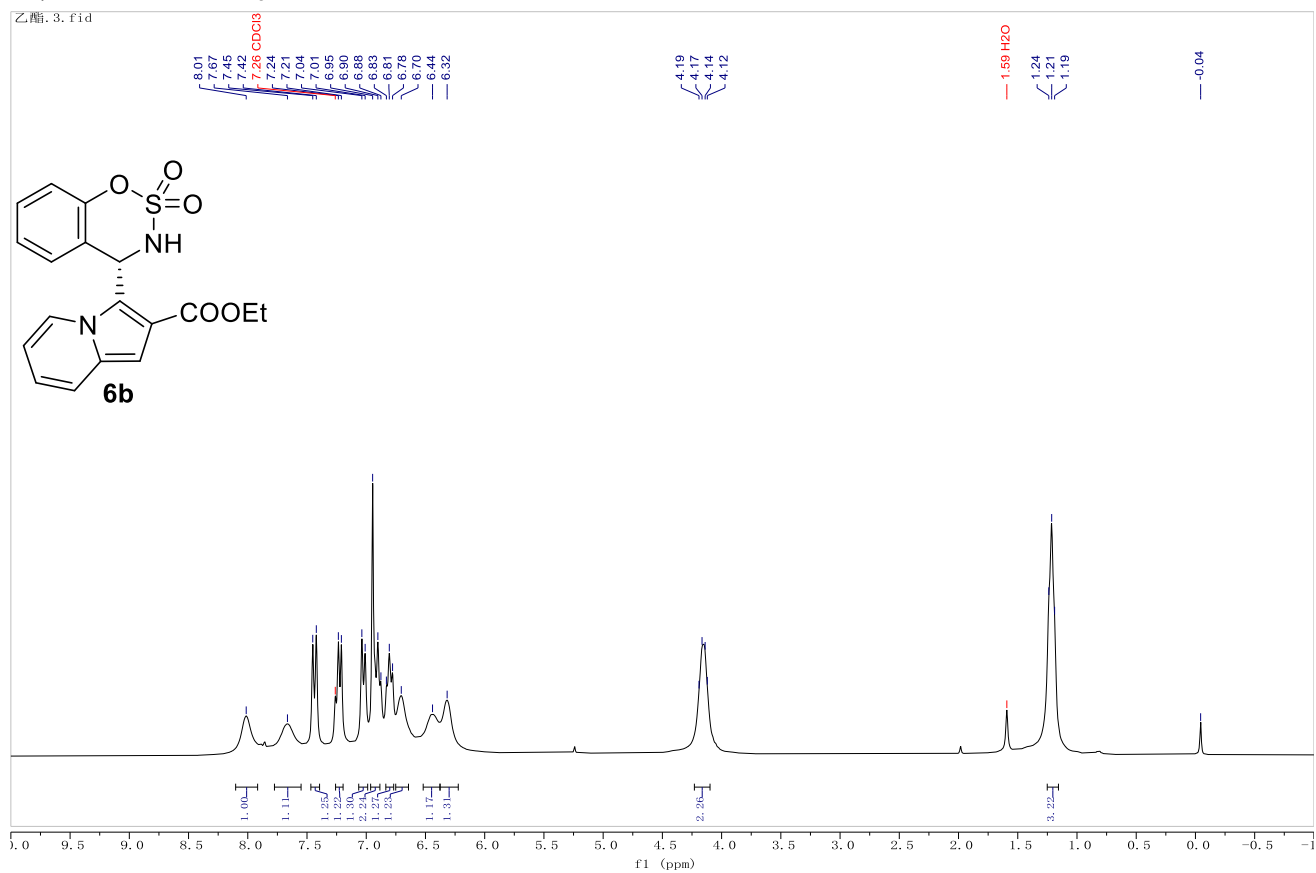



**6b**,  $^{13}\text{C}$ -NMR in  $\text{CDCl}_3$

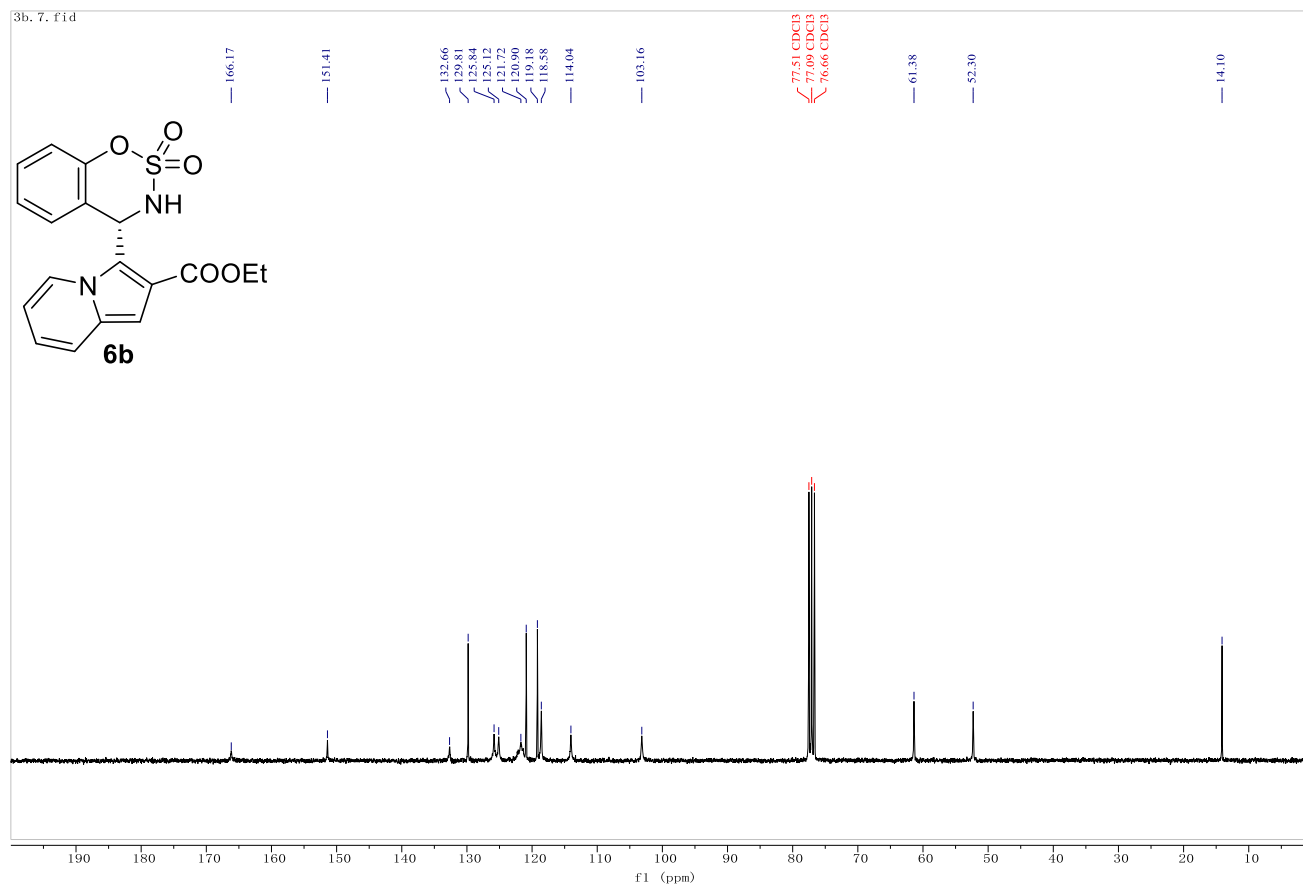

**6c**,  $^1\text{H}$ -NMR in  $\text{CDCl}_3$

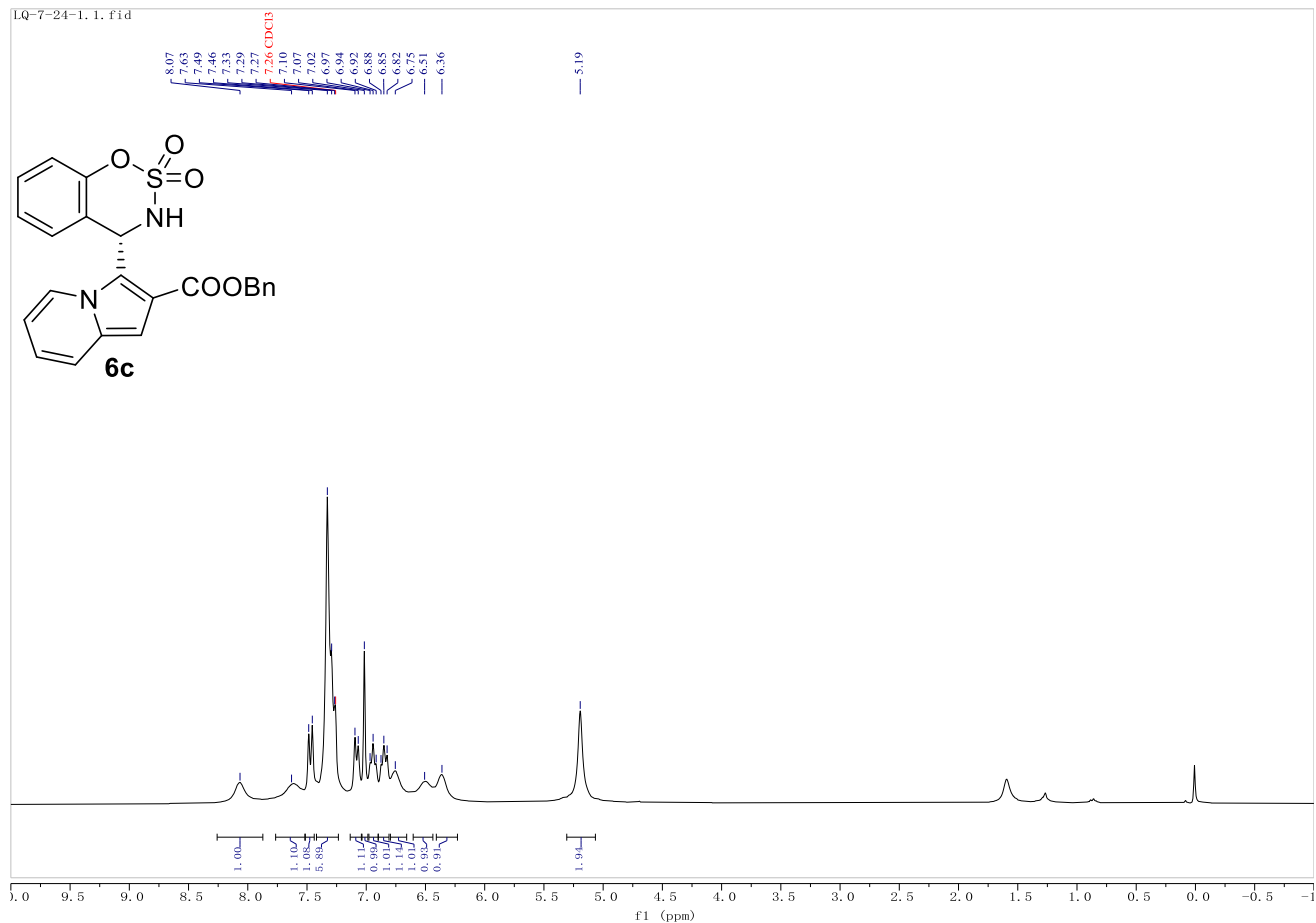

**6c**,  $^{13}\text{C}$ -NMR in  $\text{CDCl}_3$

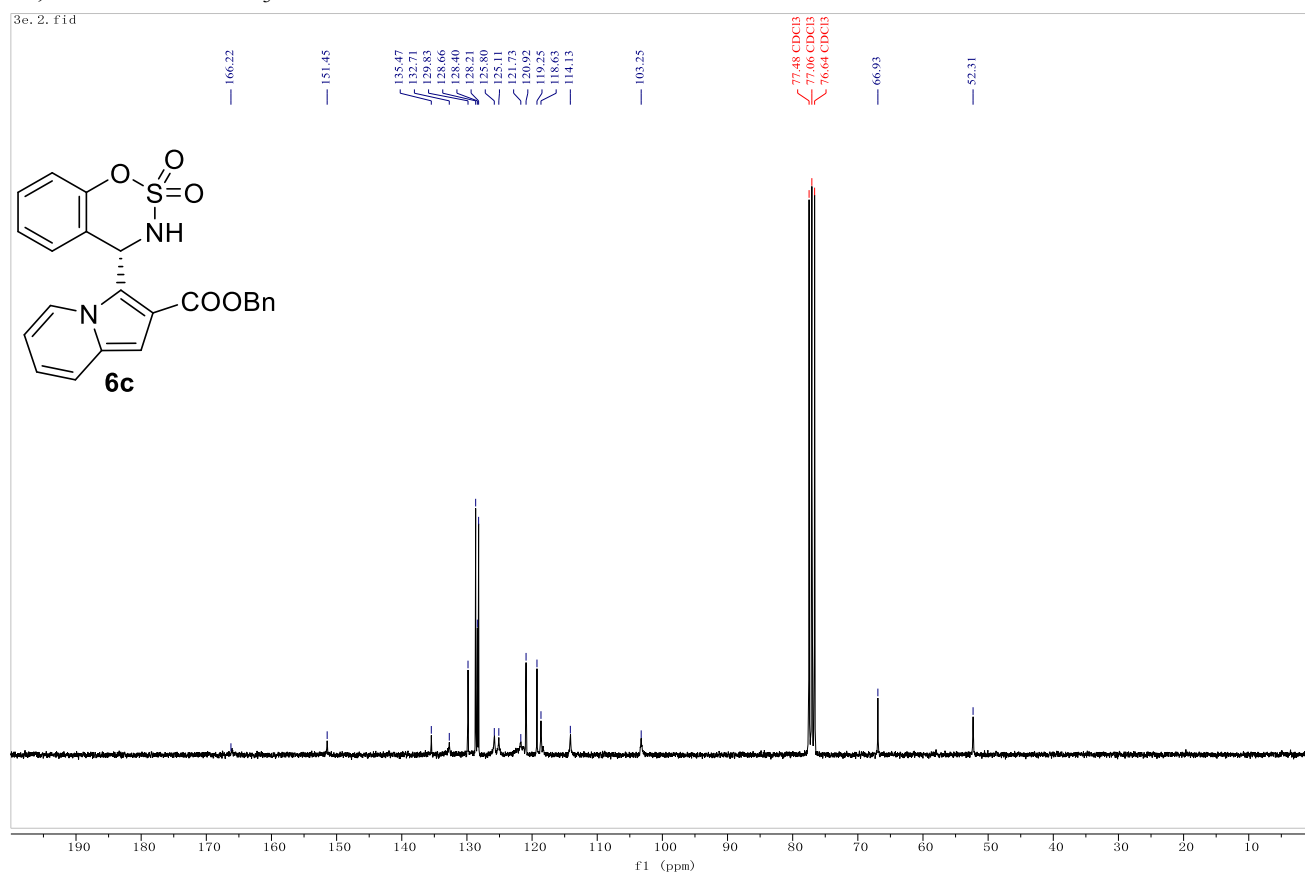

**6d**,  $^1\text{H}$ -NMR in  $\text{CDCl}_3$

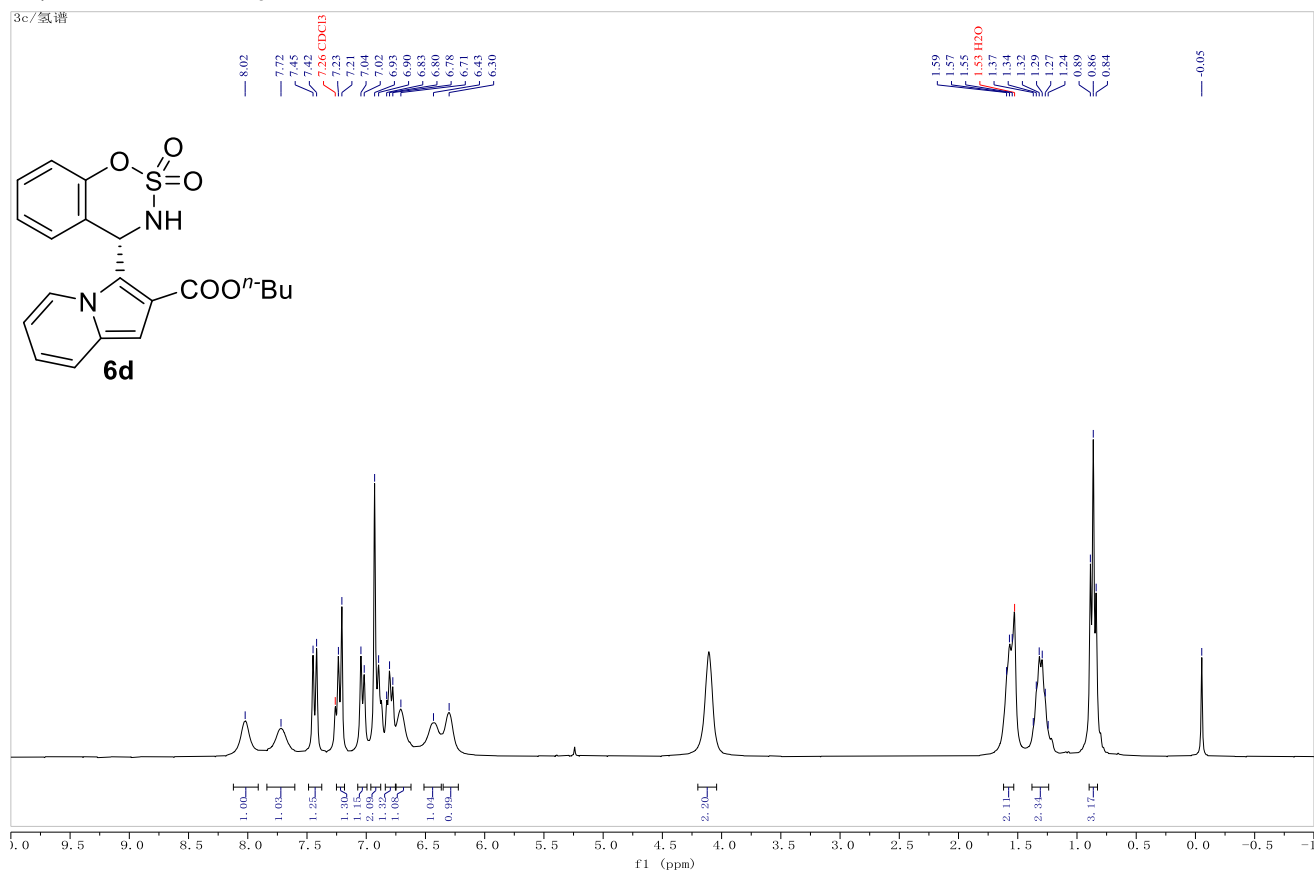

**6d**,  $^{13}\text{C}$ -NMR in  $\text{CDCl}_3$

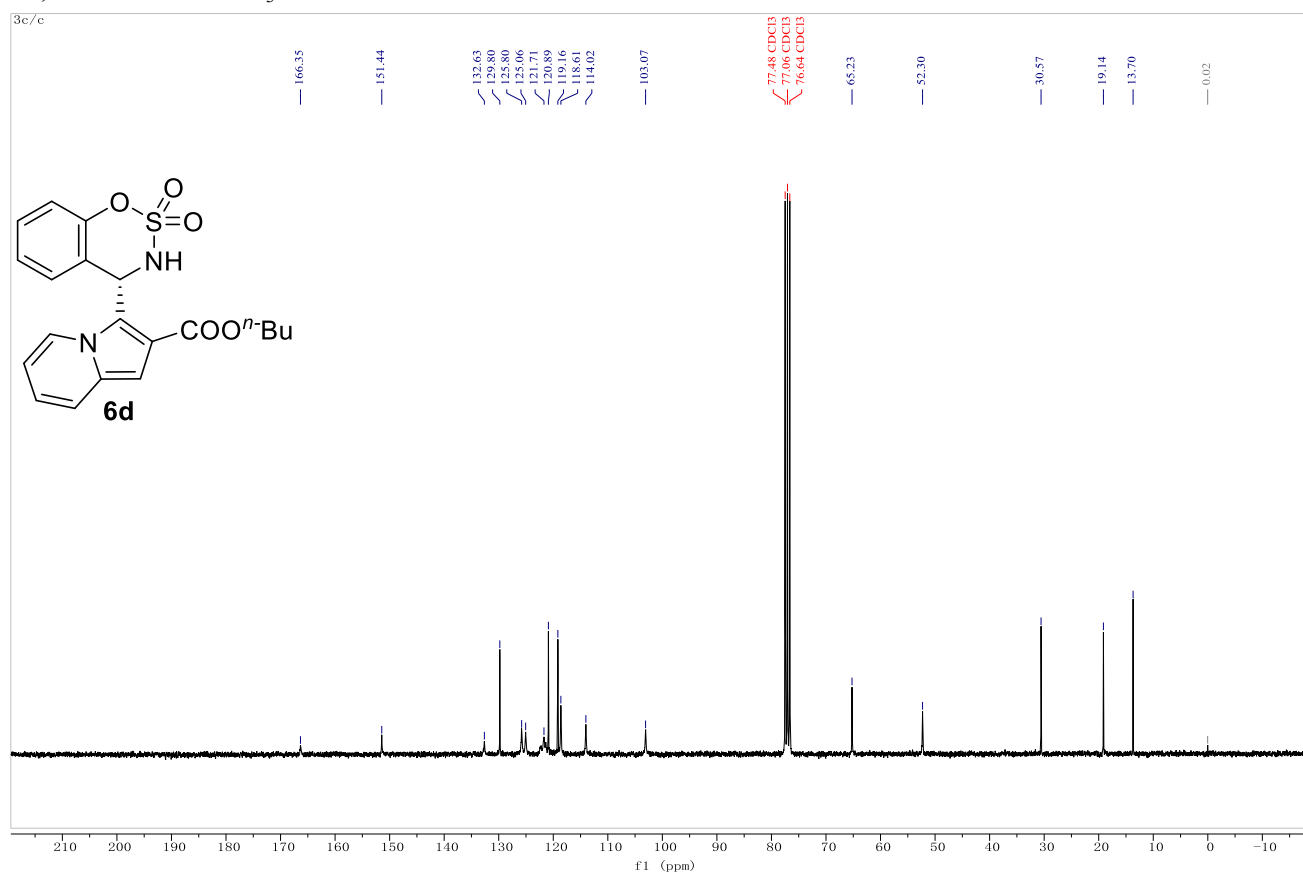

**6e**,  $^1\text{H}$ -NMR in  $\text{CDCl}_3$

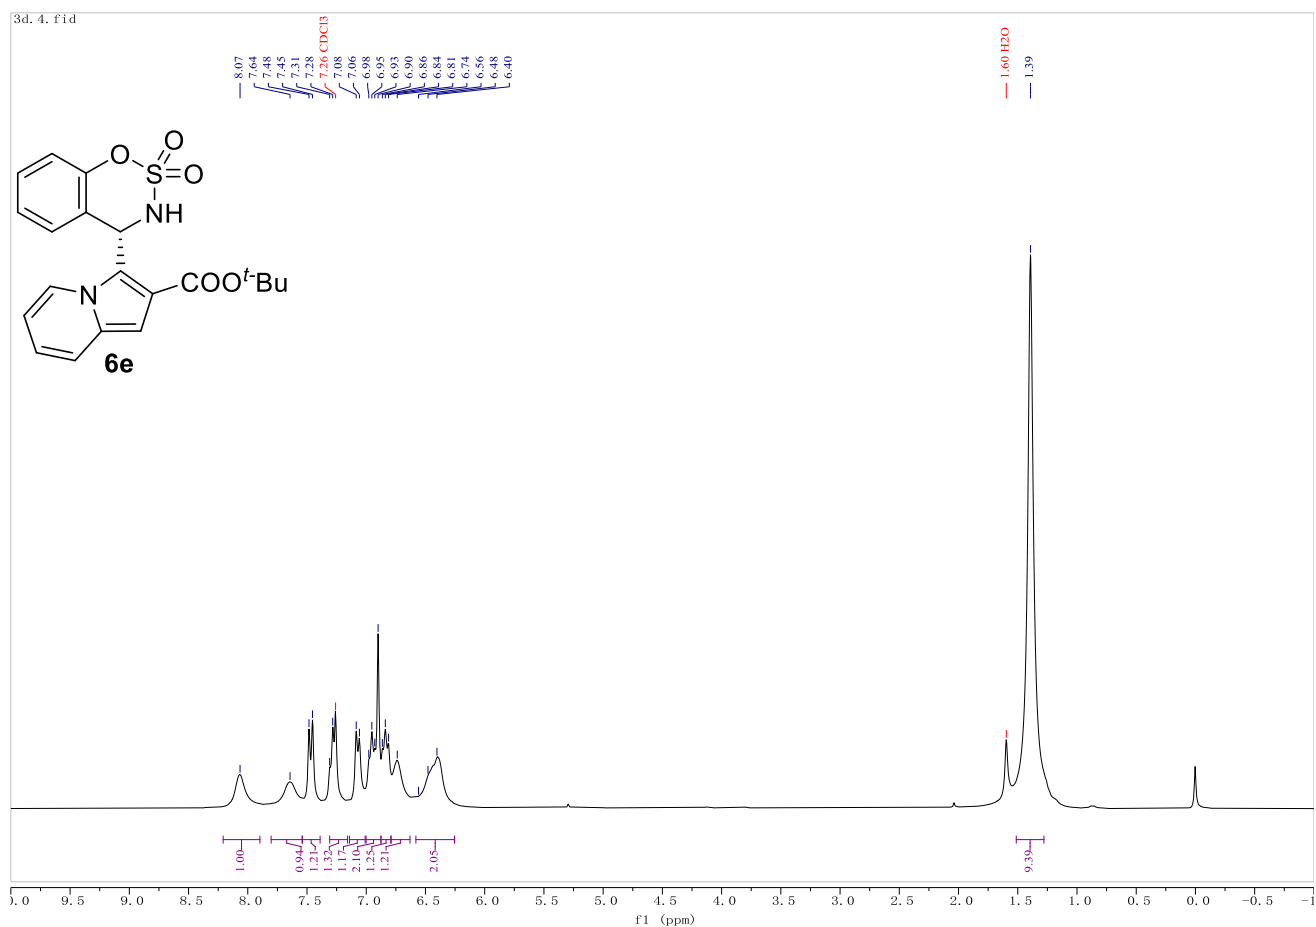

6e, <sup>13</sup>C-NMR in CDCl<sub>3</sub>

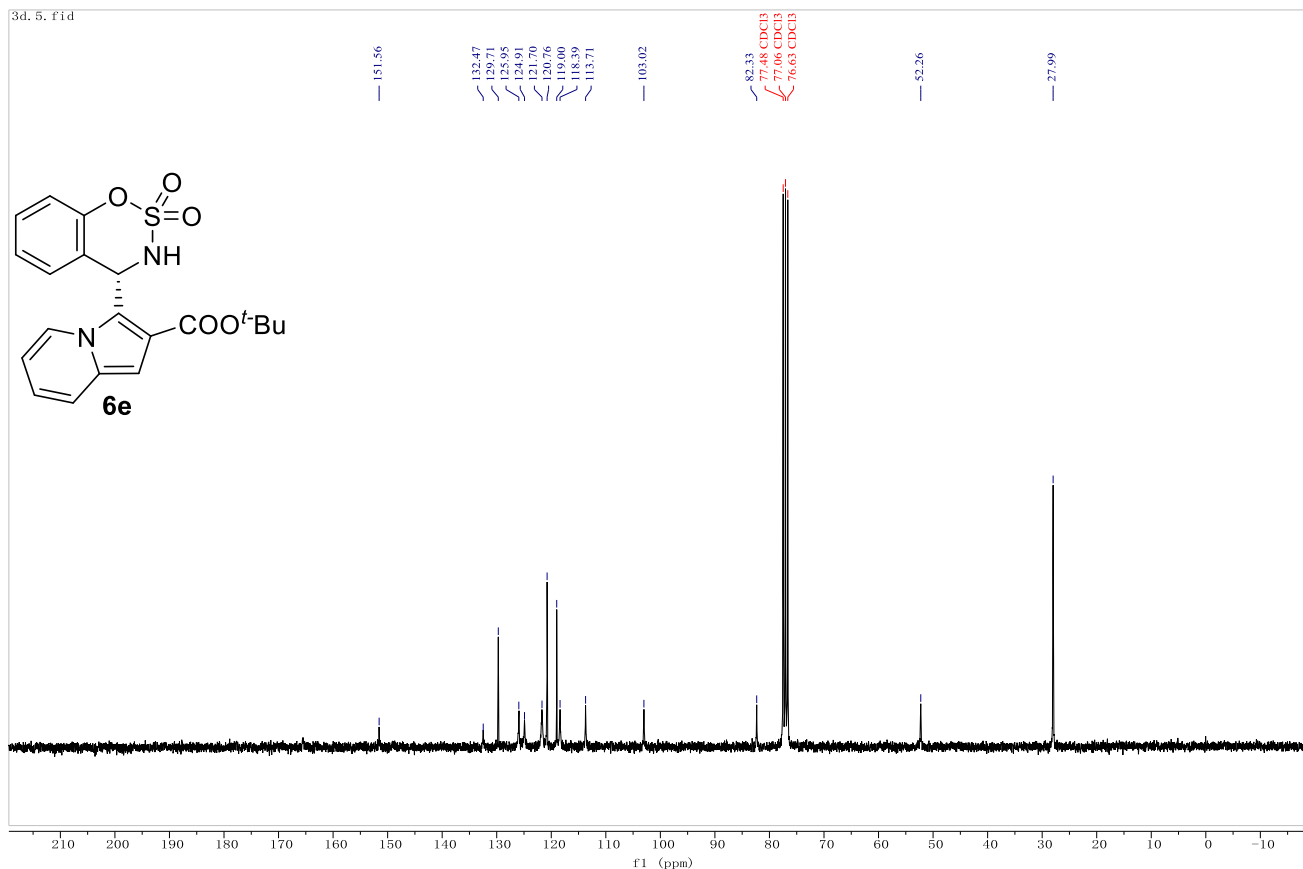

7. Copy of HPLC

Racemic 3aa:

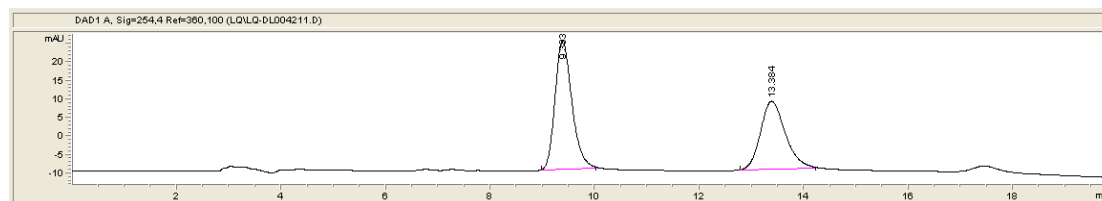

信号 1: DAD1 A, Sig=254,4 Ref=360,100

| 峰 # | 保留时间 [min] | 类型 | 峰宽 [min] | 峰面积 [mAU*s] | 峰高 [mAU] | 峰面积 %   |
|-----|------------|----|----------|-------------|----------|---------|
| 1   | 9.383      | BB | 0.3467   | 786.93188   | 34.94194 | 56.3574 |
| 2   | 13.384     | BB | 0.5062   | 609.39136   | 18.40802 | 43.6426 |

总量 : 1396.32324 53.34996

Chiral 3aa:

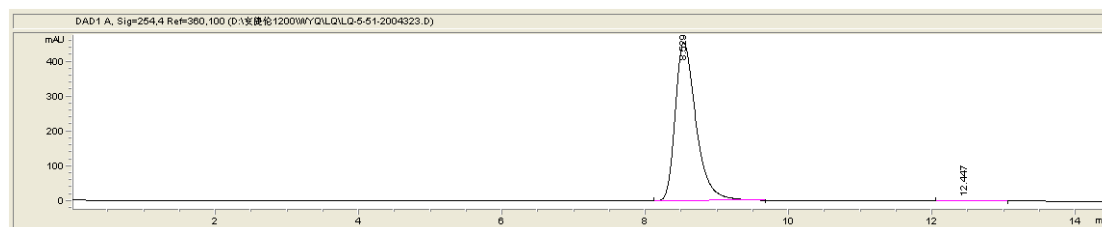

信号 1: DAD1 A, Sig=254,4 Ref=360,100

| 峰 # | 保留时间 [min] | 类型 | 峰宽 [min] | 峰面积 [mAU*s] | 峰高 [mAU]  | 峰面积 %   |
|-----|------------|----|----------|-------------|-----------|---------|
| 1   | 8.529      | BB | 0.3087   | 9231.11230  | 455.05069 | 99.3979 |
| 2   | 12.447     | BB | 0.4056   | 55.91592    | 1.93250   | 0.6021  |

总量 : 9287.02822 456.98319

### Chiral 3aa (1 mmol):

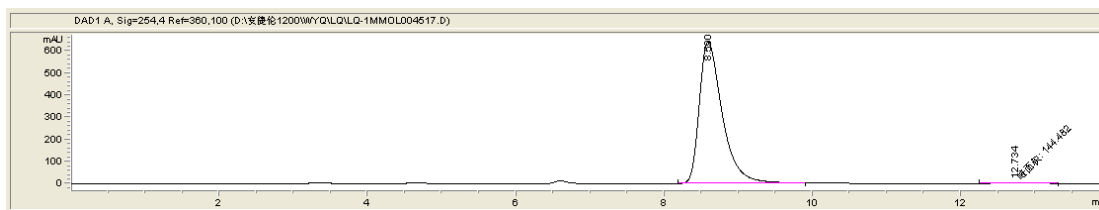

信号 1: DAD1 A, Sig=254,4 Ref=360,100

| 峰 # | 保留时间 [min] | 类型 | 峰宽 [min] | 峰面积 [mAU*s] | 峰高 [mAU]  | 峰面积 %   |
|-----|------------|----|----------|-------------|-----------|---------|
| 1   | 8.590      | BB | 0.3246   | 1.37961e4   | 642.36749 | 98.9636 |
| 2   | 12.734     | MM | 0.4933   | 144.48209   | 4.88134   | 1.0364  |

总量 : 1.39405e4 647.24883

### Racemic 3ab:

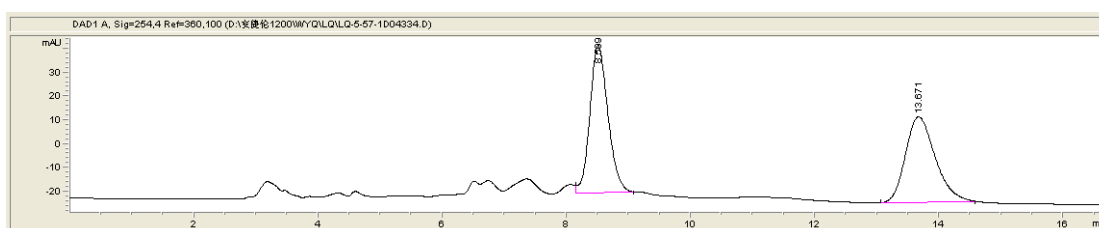

信号 1: DAD1 A, Sig=254,4 Ref=360,100

| 峰 # | 保留时间 [min] | 类型 | 峰宽 [min] | 峰面积 [mAU*s] | 峰高 [mAU] | 峰面积 %   |
|-----|------------|----|----------|-------------|----------|---------|
| 1   | 8.509      | VB | 0.3112   | 1260.03064  | 61.96294 | 51.0495 |
| 2   | 13.671     | BB | 0.5188   | 1208.22131  | 36.06490 | 48.9505 |

总量 : 2468.25195 98.02784

### Chiral 3ab:

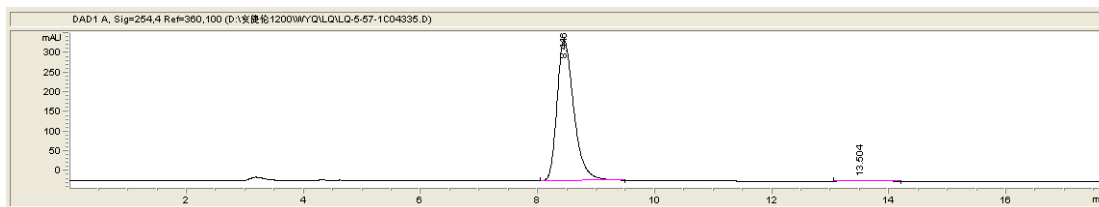

信号 1: DAD1 A, Sig=254,4 Ref=360,100

| 峰 # | 保留时间 [min] | 类型 | 峰宽 [min] | 峰面积 [mAU*s] | 峰高 [mAU]  | 峰面积 %   |
|-----|------------|----|----------|-------------|-----------|---------|
| 1   | 8.446      | BB | 0.3053   | 7178.67041  | 358.99310 | 98.8873 |
| 2   | 13.504     | BB | 0.4695   | 80.77935    | 2.57870   | 1.1127  |

总量 : 7259.44976 361.57180

### Racemic 3ac:

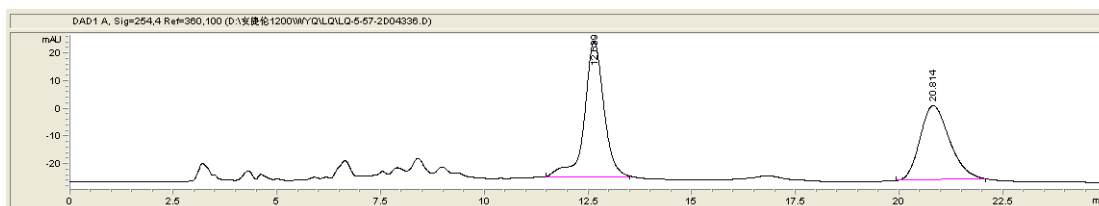

信号 1: DAD1 A, Sig=254,4 Ref=360,100

| 峰 # | 保留时间 [min] | 类型 | 峰宽 [min] | 峰面积 [mAU*s] | 峰高 [mAU] | 峰面积 %   |
|-----|------------|----|----------|-------------|----------|---------|
| 1   | 12.639     | BB | 0.4933   | 1609.35718  | 48.98925 | 54.4552 |
| 2   | 20.814     | BB | 0.7640   | 1346.01941  | 26.98180 | 45.5448 |

总量 : 2955.37659 75.97105

### Chiral 3ac:

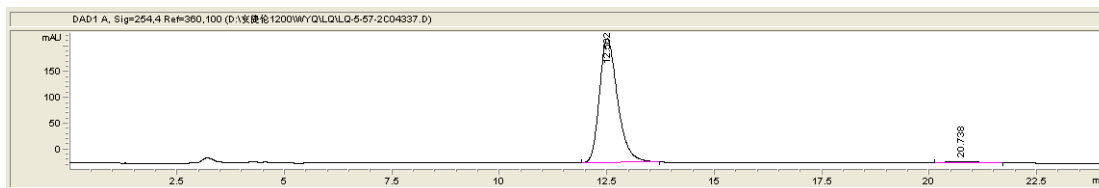

信号 1: DAD1 A, Sig=254,4 Ref=360,100

| 峰 # | 保留时间 [min] | 类型 | 峰宽 [min] | 峰面积 [mAU*s] | 峰高 [mAU]  | 峰面积 %   |
|-----|------------|----|----------|-------------|-----------|---------|
| 1   | 12.502     | BB | 0.4521   | 7085.39014  | 240.21103 | 97.9414 |
| 2   | 20.738     | BB | 0.5511   | 148.92886   | 3.24693   | 2.0586  |

总量 : 7234.31900 243.45796

### Racemic 3ad:

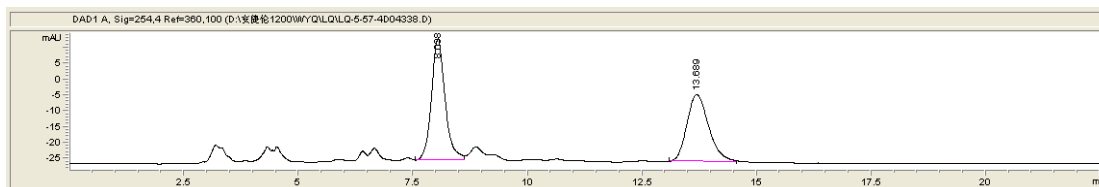

信号 1: DAD1 A, Sig=254,4 Ref=360,100

| 峰 # | 保留时间 [min] | 类型 | 峰宽 [min] | 峰面积 [mAU*s] | 峰高 [mAU] | 峰面积 %   |
|-----|------------|----|----------|-------------|----------|---------|
| 1   | 8.038      | VB | 0.3136   | 802.31140   | 38.42495 | 53.5270 |
| 2   | 13.689     | BB | 0.5043   | 696.57843   | 21.14774 | 46.4730 |

总量 : 1498.88983 59.57269

### Chiral 3ad:

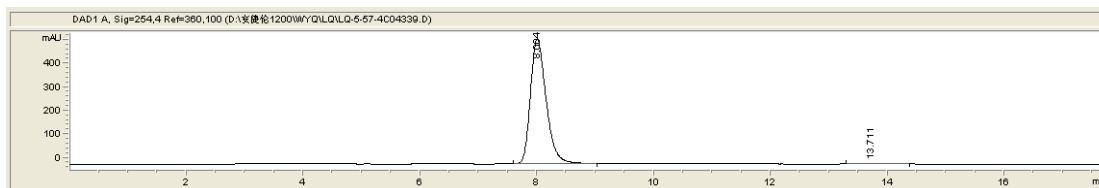

信号 1: DAD1 A, Sig=254,4 Ref=360,100

| 峰 # | 保留时间 [min] | 类型 | 峰宽 [min] | 峰面积 [mAU*s] | 峰高 [mAU]  | 峰面积 %   |
|-----|------------|----|----------|-------------|-----------|---------|
| 1   | 8.004      | BB | 0.2879   | 9897.74414  | 530.02649 | 99.3288 |
| 2   | 13.711     | BB | 0.4361   | 66.88224    | 2.24130   | 0.6712  |

总量 : 9964.62638 532.26779

### Racemic 3ae:

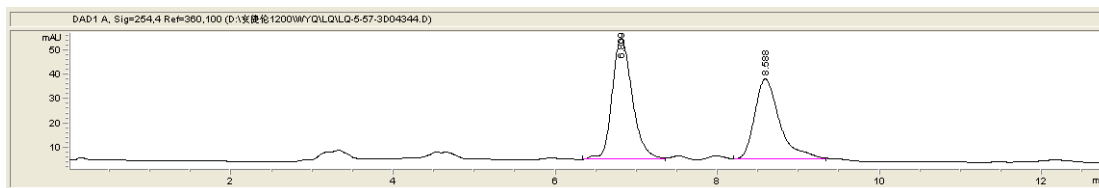

信号 1: DAD1 A, Sig=254,4 Ref=360,100

| 峰 # | 保留时间 [min] | 类型 | 峰宽 [min] | 峰面积 [mAU*s] | 峰高 [mAU] | 峰面积 %   |
|-----|------------|----|----------|-------------|----------|---------|
| 1   | 6.809      | BB | 0.2683   | 874.59363   | 49.94981 | 55.0555 |
| 2   | 8.588      | VB | 0.3252   | 713.97498   | 33.16369 | 44.9445 |

总量 : 1588.56860 83.11350

Chiral 3ae:

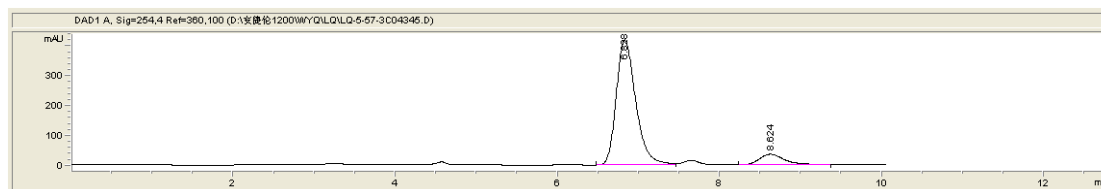

信号 1: DAD1 A, Sig=254,4 Ref=360,100

| 峰 # | 保留时间 [min] | 类型 | 峰宽 [min] | 峰面积 [mAU*s] | 峰高 [mAU]  | 峰面积 %   |
|-----|------------|----|----------|-------------|-----------|---------|
| 1   | 6.828      | BV | 0.2571   | 7001.02051  | 418.71365 | 89.9897 |
| 2   | 8.624      | BB | 0.3348   | 778.78113   | 35.38276  | 10.0103 |

总量 : 7779.80164 454.09642

Racemic 3af:

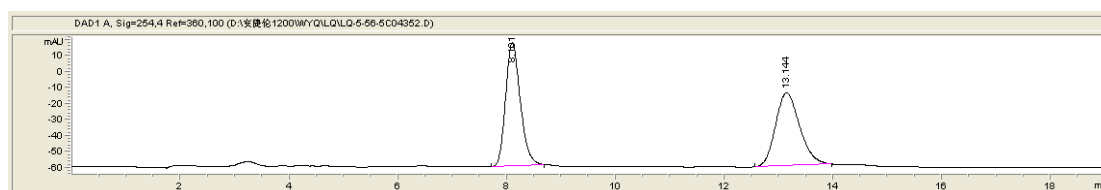

信号 1: DAD1 A, Sig=254,4 Ref=360,100

| 峰 # | 保留时间 [min] | 类型 | 峰宽 [min] | 峰面积 [mAU*s] | 峰高 [mAU] | 峰面积 %   |
|-----|------------|----|----------|-------------|----------|---------|
| 1   | 8.101      | BB | 0.2925   | 1457.75671  | 77.11700 | 50.7265 |
| 2   | 13.144     | BB | 0.4771   | 1416.00000  | 45.75404 | 49.2735 |

总量 : 2873.75671 122.87104

Chiral 3af:

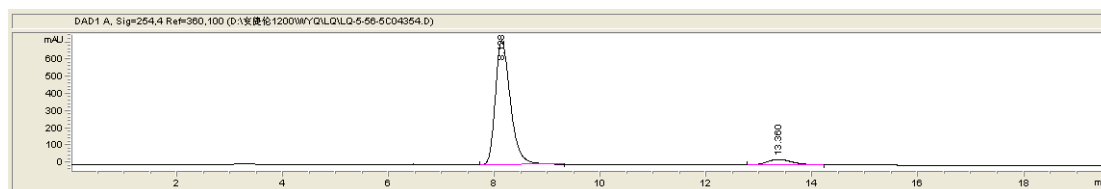

信号 1: DAD1 A, Sig=254,4 Ref=360,100

| 峰 # | 保留时间 [min] | 类型 | 峰宽 [min] | 峰面积 [mAU*s] | 峰高 [mAU]  | 峰面积 %   |
|-----|------------|----|----------|-------------|-----------|---------|
| 1   | 8.128      | BB | 0.3030   | 1.42978e4   | 722.19153 | 93.1522 |
| 2   | 13.360     | BB | 0.5012   | 1051.07031  | 32.17151  | 6.8478  |

总量 : 1.53489e4 754.36304

### Racemic 3ag:

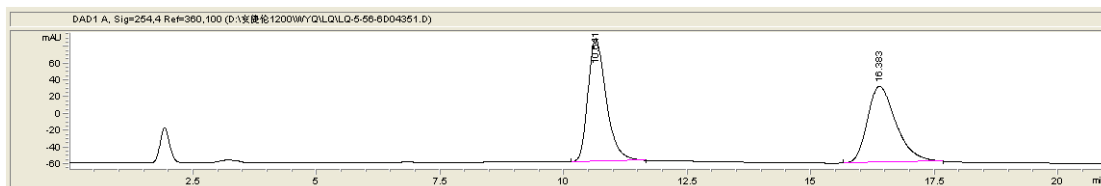

信号 1: DAD1 A, Sig=254,4 Ref=360,100

| 峰 # | 保留时间 [min] | 类型 | 峰宽 [min] | 峰面积 [mAU*s] | 峰高 [mAU]  | 峰面积 %   |
|-----|------------|----|----------|-------------|-----------|---------|
| 1   | 10.641     | BB | 0.3952   | 3790.72388  | 146.81693 | 50.7014 |
| 2   | 16.383     | BB | 0.6132   | 3685.83789  | 91.26061  | 49.2986 |

总量 : 7476.56177 238.07754

### Chiral 3ag:

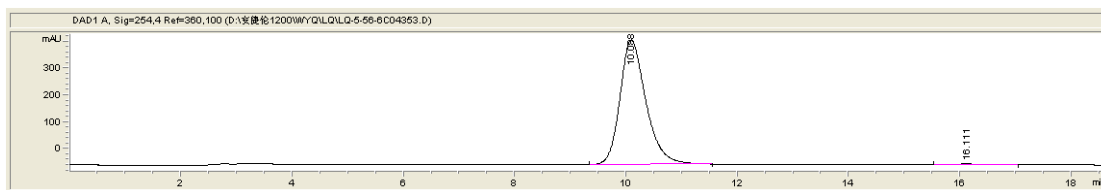

信号 1: DAD1 A, Sig=254,4 Ref=360,100

| 峰 # | 保留时间 [min] | 类型 | 峰宽 [min] | 峰面积 [mAU*s] | 峰高 [mAU]  | 峰面积 %   |
|-----|------------|----|----------|-------------|-----------|---------|
| 1   | 10.088     | BB | 0.4911   | 1.50887e4   | 464.32034 | 99.0299 |
| 2   | 16.111     | BB | 0.5380   | 147.80820   | 3.42154   | 0.9701  |

总量 : 1.52365e4 467.74189

### Racemic 3ah:

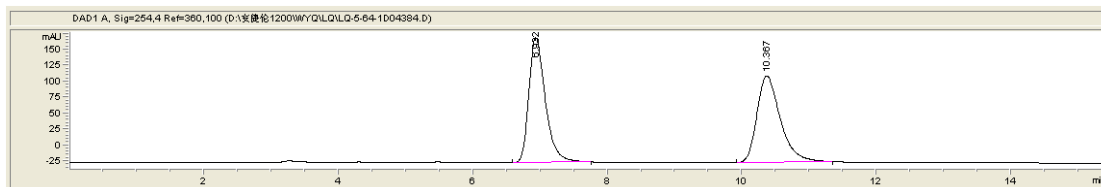

信号 1: DAD1 A, Sig=254,4 Ref=360,100

| 峰 # | 保留时间 [min] | 类型 | 峰宽 [min] | 峰面积 [mAU*s] | 峰高 [mAU]  | 峰面积 %   |
|-----|------------|----|----------|-------------|-----------|---------|
| 1   | 6.932      | BB | 0.2604   | 3364.11426  | 195.81224 | 50.4133 |
| 2   | 10.367     | BB | 0.3685   | 3308.95117  | 135.69724 | 49.5867 |

总量 : 6673.06543 331.50948

### Chiral 3ah:

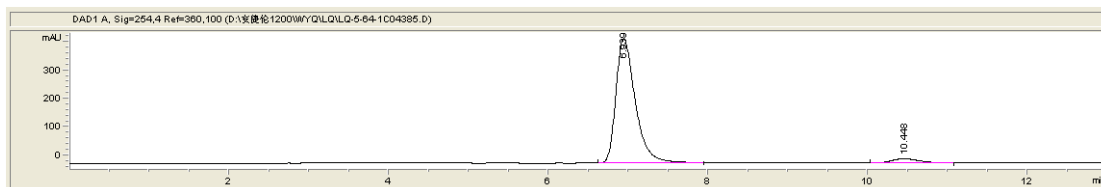



信号 1: DAD1 A, Sig=254,4 Ref=360,100

| 峰 # | 保留时间 [min] | 类型 | 峰宽 [min] | 峰面积 [mAU*s] | 峰高 [mAU]  | 峰面积 %   |
|-----|------------|----|----------|-------------|-----------|---------|
| 1   | 6.939      | BB | 0.2567   | 7395.08203  | 438.67990 | 95.2050 |
| 2   | 10.448     | BB | 0.3703   | 372.45148   | 15.28143  | 4.7950  |

总量 : 7767.53351 453.96133

### Racemic 3ai:

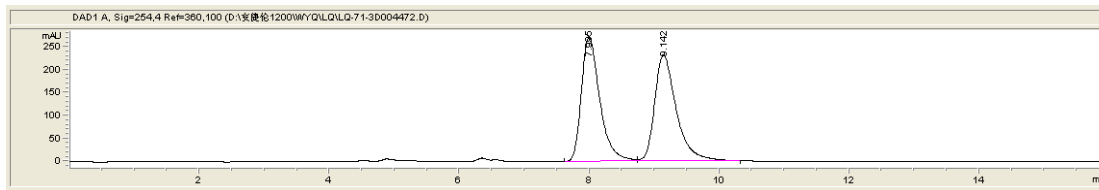

信号 1: DAD1 A, Sig=254,4 Ref=360,100

| 峰 # | 保留时间 [min] | 类型 | 峰宽 [min] | 峰面积 [mAU*s] | 峰高 [mAU]  | 峰面积 %   |
|-----|------------|----|----------|-------------|-----------|---------|
| 1   | 7.995      | BV | 0.3006   | 5380.99951  | 272.28937 | 49.8555 |
| 2   | 9.142      | VB | 0.3521   | 5412.18262  | 232.02361 | 50.1445 |

总量 : 1.07932e4 504.31297

### Chiral 3ai:

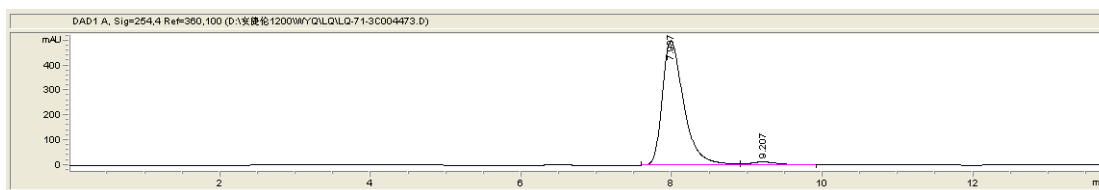

信号 1: DAD1 A, Sig=254,4 Ref=360,100

| 峰 # | 保留时间 [min] | 类型 | 峰宽 [min] | 峰面积 [mAU*s] | 峰高 [mAU]  | 峰面积 %   |
|-----|------------|----|----------|-------------|-----------|---------|
| 1   | 7.987      | BB | 0.3016   | 9934.17871  | 500.42062 | 96.8221 |
| 2   | 9.207      | BB | 0.3907   | 326.05582   | 12.24522  | 3.1779  |

总量 : 1.02602e4 512.66584

### Racemic 3aj:

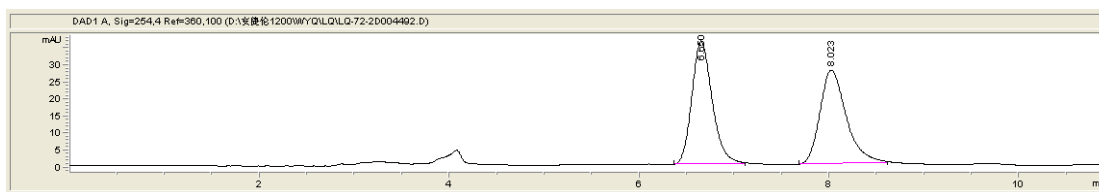

信号 1: DAD1 A, Sig=254,4 Ref=360,100

| 峰 # | 保留时间 [min] | 类型 | 峰宽 [min] | 峰面积 [mAU*s] | 峰高 [mAU] | 峰面积 %   |
|-----|------------|----|----------|-------------|----------|---------|
| 1   | 6.650      | BB | 0.2283   | 540.01434   | 36.15530 | 50.3269 |
| 2   | 8.023      | BB | 0.2963   | 532.99866   | 27.47281 | 49.6731 |

总量 : 1073.01300 63.62811

### Chiral 3aj:

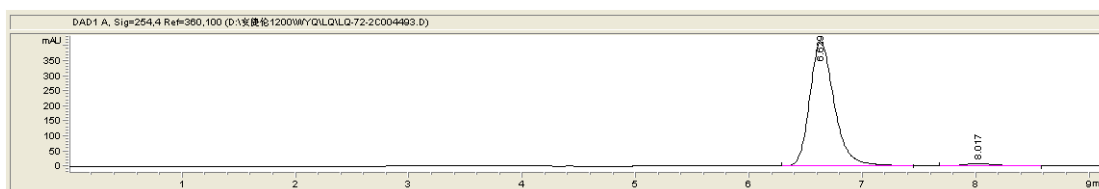

信号 1: DAD1 A, Sig=254,4 Ref=360,100

| 峰 # | 保留时间 [min] | 类型 | 峰宽 [min] | 峰面积 [mAU*s] | 峰高 [mAU]  | 峰面积 %   |
|-----|------------|----|----------|-------------|-----------|---------|
| 1   | 6.629      | BB | 0.2286   | 6181.32227  | 413.14297 | 97.7464 |
| 2   | 8.017      | BB | 0.2883   | 142.51685   | 7.41406   | 2.2536  |

总量 : 6323.83911 420.55704

### Racemic 3ak:

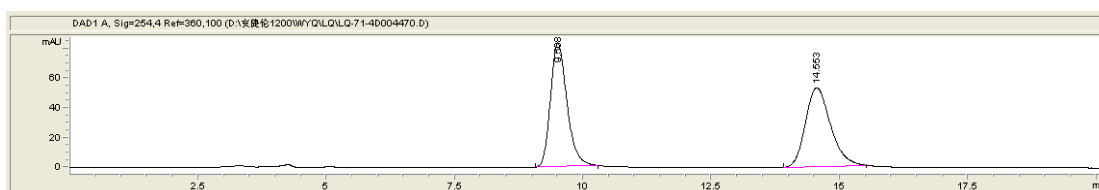

信号 1: DAD1 A, Sig=254,4 Ref=360,100

| 峰 # | 保留时间 [min] | 类型 | 峰宽 [min] | 峰面积 [mAU*s] | 峰高 [mAU] | 峰面积 %   |
|-----|------------|----|----------|-------------|----------|---------|
| 1   | 9.508      | BB | 0.3451   | 1883.88733  | 83.53600 | 50.7887 |
| 2   | 14.553     | BB | 0.5274   | 1825.38086  | 53.32437 | 49.2113 |

总量 : 3709.26819 136.86037

### Chiral 3ak:

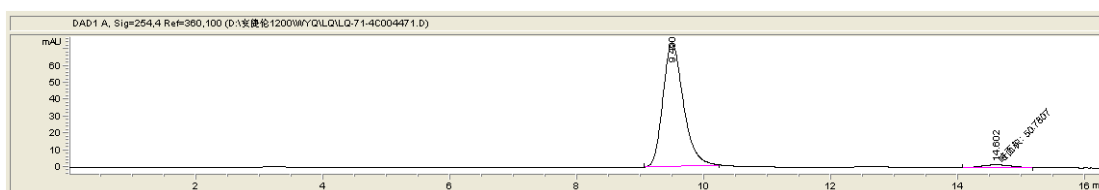

信号 1: DAD1 A, Sig=254,4 Ref=360,100

| 峰 # | 保留时间 [min] | 类型 | 峰宽 [min] | 峰面积 [mAU*s] | 峰高 [mAU] | 峰面积 %   |
|-----|------------|----|----------|-------------|----------|---------|
| 1   | 9.490      | BB | 0.3444   | 1652.58728  | 73.46703 | 97.0188 |
| 2   | 14.602     | MM | 0.5245   | 50.78072    | 1.61367  | 2.9812  |

总量 : 1703.36800 75.08069

### Racemic 3al:

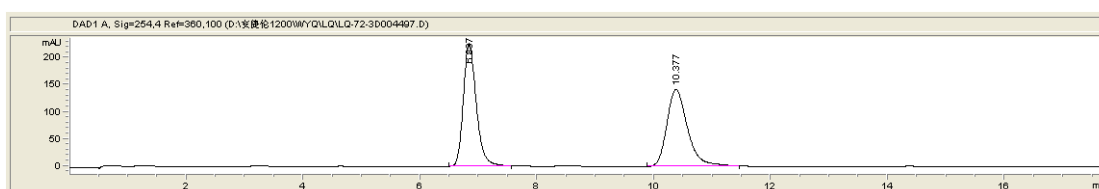

信号 1: DAD1 A, Sig=254,4 Ref=360,100

| 峰 # | 保留时间 [min] | 类型 | 峰宽 [min] | 峰面积 [mAU*s] | 峰高 [mAU]  | 峰面积 %   |
|-----|------------|----|----------|-------------|-----------|---------|
| 1   | 6.837      | BB | 0.2355   | 3485.34717  | 226.52129 | 49.9463 |
| 2   | 10.377     | BB | 0.3738   | 3492.84155  | 142.58202 | 50.0537 |

总量 : 6978.18872 369.10330

### Chiral 3al:

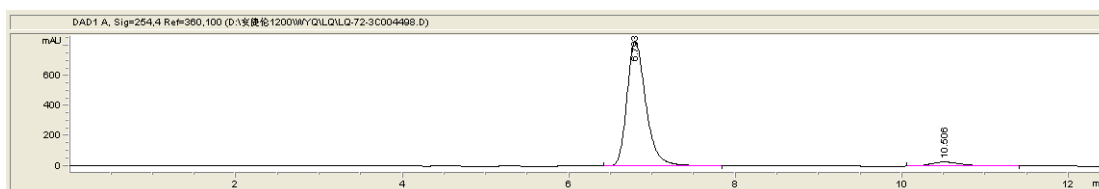

信号 1: DAD1 A, Sig=254,4 Ref=360,100

| 峰 # | 保留时间 [min] | 类型 | 峰宽 [min] | 峰面积 [mAU*s] | 峰高 [mAU]  | 峰面积 %   |
|-----|------------|----|----------|-------------|-----------|---------|
| 1   | 6.793      | VB | 0.2404   | 1.31209e4   | 830.26324 | 94.7499 |
| 2   | 10.506     | BB | 0.4044   | 727.02240   | 26.98153  | 5.2501  |

总量 : 1.38479e4 857.24477

### Racemic 3am:

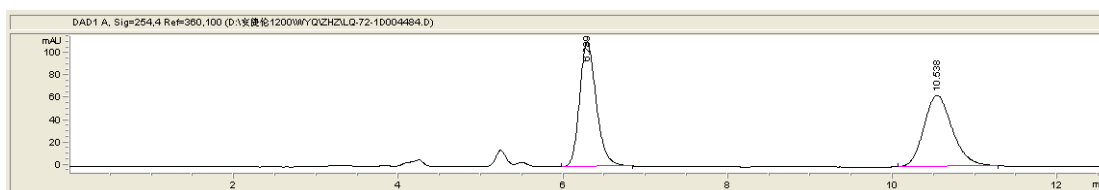

信号 1: DAD1 A, Sig=254,4 Ref=360,100

| 峰 # | 保留时间 [min] | 类型 | 峰宽 [min] | 峰面积 [mAU*s] | 峰高 [mAU]  | 峰面积 %   |
|-----|------------|----|----------|-------------|-----------|---------|
| 1   | 6.289      | BB | 0.2165   | 1576.10254  | 111.77472 | 50.5279 |
| 2   | 10.538     | BB | 0.3699   | 1543.16748  | 63.85543  | 49.4721 |

总量 : 3119.27002 175.63015

### Chiral 3am:

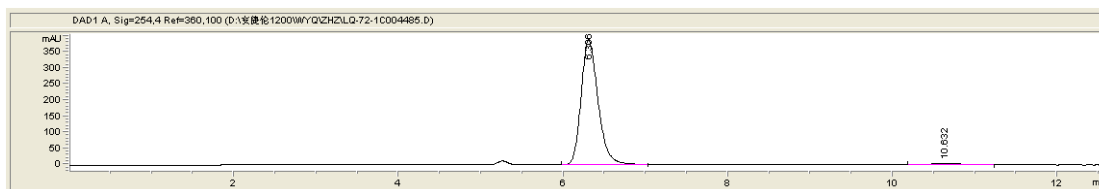

信号 1: DAD1 A, Sig=254,4 Ref=360,100

| 峰 # | 保留时间 [min] | 类型 | 峰宽 [min] | 峰面积 [mAU*s] | 峰高 [mAU]  | 峰面积 %   |
|-----|------------|----|----------|-------------|-----------|---------|
| 1   | 6.306      | BB | 0.2188   | 5569.03369  | 389.53912 | 97.6767 |
| 2   | 10.632     | BB | 0.3748   | 132.46118   | 5.42602   | 2.3233  |

总量 : 5701.49487 394.96514

### Racemic 3ba:

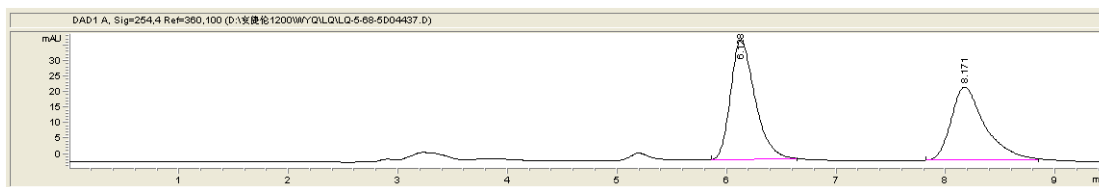

信号 1: DAD1 A, Sig=254,4 Ref=360,100

| 峰 # | 保留时间 [min] | 类型 | 峰宽 [min] | 峰面积 [mAU*s] | 峰高 [mAU] | 峰面积 %   |
|-----|------------|----|----------|-------------|----------|---------|
| 1   | 6.128      | BB | 0.2357   | 604.31744   | 38.80529 | 54.3767 |
| 2   | 8.171      | BB | 0.3189   | 507.03662   | 23.58056 | 45.6233 |

总量 : 1111.35406 62.38585

### Chiral 3ba:

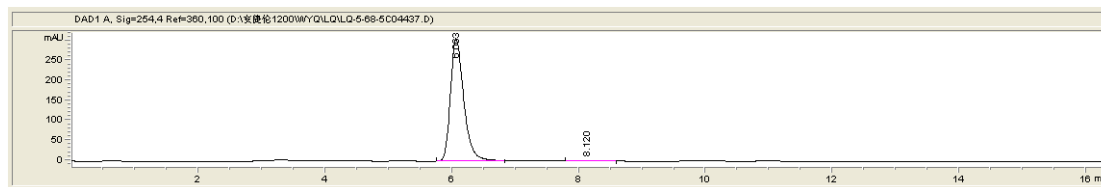

信号 1: DAD1 A, Sig=254,4 Ref=360,100

| 峰 # | 保留时间 [min] | 类型 | 峰宽 [min] | 峰面积 [mAU*s] | 峰高 [mAU]  | 峰面积 %   |
|-----|------------|----|----------|-------------|-----------|---------|
| 1   | 6.063      | BB | 0.2224   | 4487.42139  | 307.21854 | 99.0418 |
| 2   | 8.120      | BB | 0.2865   | 43.41303    | 2.19780   | 0.9582  |

总量 : 4530.83442 309.41633

### Racemic 3ca:

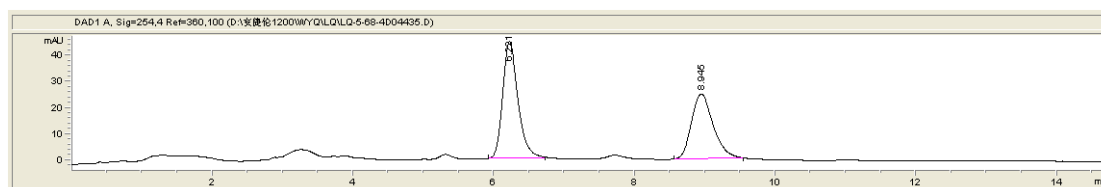

信号 1: DAD1 A, Sig=254,4 Ref=360,100

| 峰 # | 保留时间 [min] | 类型 | 峰宽 [min] | 峰面积 [mAU*s] | 峰高 [mAU] | 峰面积 %   |
|-----|------------|----|----------|-------------|----------|---------|
| 1   | 6.221      | BB | 0.2300   | 674.24652   | 44.68898 | 55.5391 |
| 2   | 8.945      | BB | 0.3310   | 539.75604   | 24.88884 | 44.4609 |

总量 : 1214.00256 69.57782

### Chiral 3ca:

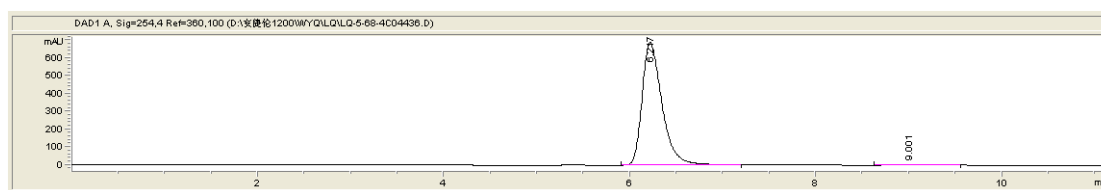

信号 1: DAD1 A, Sig=254,4 Ref=360,100

| 峰 # | 保留时间 [min] | 类型 | 峰宽 [min] | 峰面积 [mAU*s] | 峰高 [mAU]  | 峰面积 %   |
|-----|------------|----|----------|-------------|-----------|---------|
| 1   | 6.217      | BB | 0.2257   | 1.02402e4   | 687.81586 | 98.9527 |
| 2   | 9.001      | BB | 0.3309   | 108.37885   | 4.80894   | 1.0473  |

总量 : 1.03486e4 692.62480

### Racemic 3da:

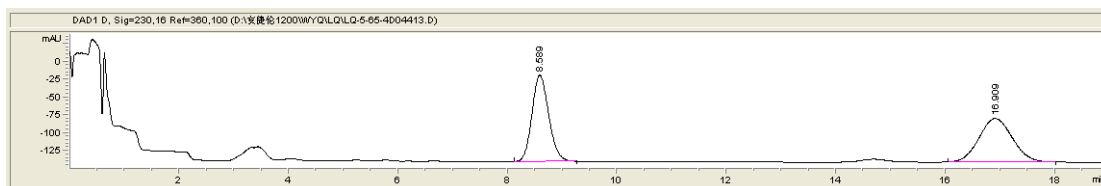

信号 3: DAD1 D, Sig=230,16 Ref=360,100

| 峰 # | 保留时间 [min] | 类型 | 峰宽 [min] | 峰面积 [mAU*s] | 峰高 [mAU]  | 峰面积 %   |
|-----|------------|----|----------|-------------|-----------|---------|
| 1   | 8.589      | BB | 0.3293   | 2588.85742  | 121.15580 | 49.9466 |
| 2   | 16.909     | BB | 0.6617   | 2594.39453  | 61.06507  | 50.0534 |

总量 : 5183.25195 182.22087

### Chiral 3da:

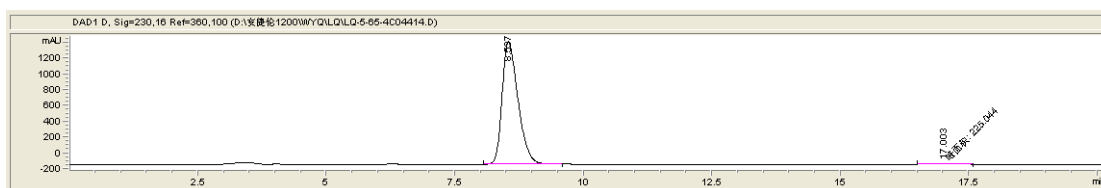

信号 3: DAD1 D, Sig=230,16 Ref=360,100

| 峰 # | 保留时间 [min] | 类型 | 峰宽 [min] | 峰面积 [mAU*s] | 峰高 [mAU]   | 峰面积 %   |
|-----|------------|----|----------|-------------|------------|---------|
| 1   | 8.537      | BB | 0.3307   | 3.33690e4   | 1552.64575 | 99.3301 |
| 2   | 17.003     | MM | 0.5909   | 225.04395   | 6.34727    | 0.6699  |

总量 : 3.35941e4 1558.99302

### Racemic 3ea:

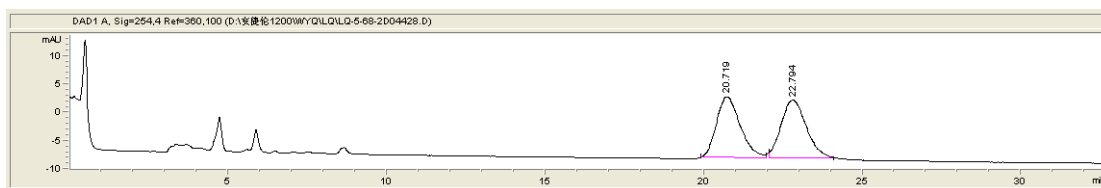

信号 1: DAD1 A, Sig=254,4 Ref=360,100

| 峰 # | 保留时间 [min] | 类型 | 峰宽 [min] | 峰面积 [mAU*s] | 峰高 [mAU] | 峰面积 %   |
|-----|------------|----|----------|-------------|----------|---------|
| 1   | 20.719     | BB | 0.7632   | 564.15570   | 10.73407 | 49.9172 |
| 2   | 22.794     | BB | 0.7498   | 566.02826   | 10.22600 | 50.0828 |

总量 : 1130.18396 20.96007

### Chiral 3ea:

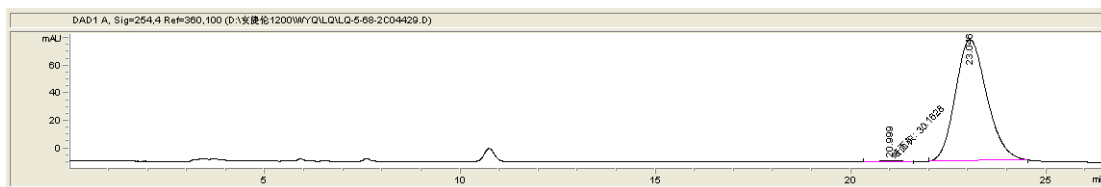

信号 1: DAD1 A, Sig=254,4 Ref=360,100

| 峰 # | 保留时间 [min] | 类型 | 峰宽 [min] | 峰面积 [mAU*s] | 峰高 [mAU]   | 峰面积 %   |
|-----|------------|----|----------|-------------|------------|---------|
| 1   | 20.999     | MM | 0.7164   | 30.16283    | 7.01717e-1 | 0.6056  |
| 2   | 23.046     | BB | 0.8673   | 4950.74414  | 88.14051   | 99.3944 |

总量 : 4980.90697 88.84223

**Racemic 3fa:**

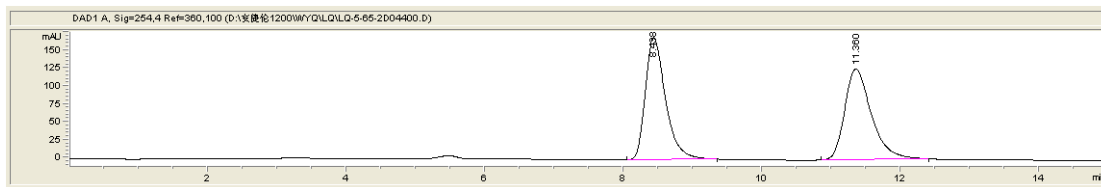

信号 1: DAD1 A, Sig=254,4 Ref=360,100

| 峰 # | 保留时间 [min] | 类型 | 峰宽 [min] | 峰面积 [mAU*s] | 峰高 [mAU]  | 峰面积 %   |
|-----|------------|----|----------|-------------|-----------|---------|
| 1   | 8.438      | BB | 0.3094   | 3465.39331  | 170.29370 | 50.4103 |
| 2   | 11.360     | BB | 0.4081   | 3408.97656  | 126.61790 | 49.5897 |

总量 : 6874.36987 296.91160

**Chiral 3fa:**

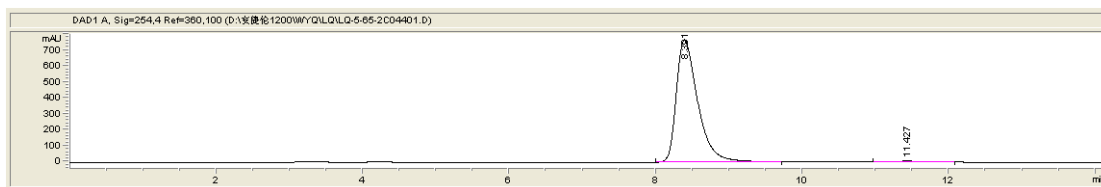

信号 1: DAD1 A, Sig=254,4 Ref=360,100

| 峰 # | 保留时间 [min] | 类型 | 峰宽 [min] | 峰面积 [mAU*s] | 峰高 [mAU]  | 峰面积 %   |
|-----|------------|----|----------|-------------|-----------|---------|
| 1   | 8.391      | BB | 0.3094   | 1.56469e4   | 768.89252 | 98.9491 |
| 2   | 11.427     | BB | 0.3936   | 166.18591   | 6.30386   | 1.0509  |

总量 : 1.58131e4 775.19637

**Racemic 3ga:**

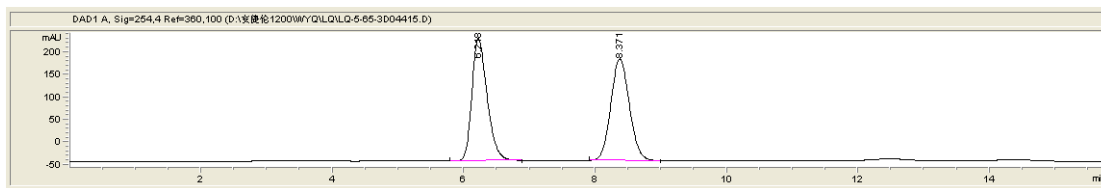

信号 1: DAD1 A, Sig=254,4 Ref=360,100

| 峰 # | 保留时间 [min] | 类型 | 峰宽 [min] | 峰面积 [mAU*s] | 峰高 [mAU]  | 峰面积 %   |
|-----|------------|----|----------|-------------|-----------|---------|
| 1   | 6.218      | BB | 0.2471   | 4398.85937  | 271.38086 | 49.7551 |
| 2   | 8.371      | BB | 0.3054   | 4442.15771  | 225.92586 | 50.2449 |

总量 : 8841.01709 497.30672

**Chiral 3ga:**

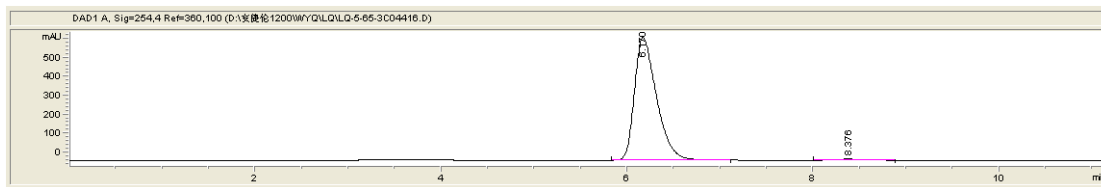

信号 1: DAD1 A, Sig=254,4 Ref=360,100

| 峰 # | 保留时间 [min] | 类型 | 峰宽 [min] | 峰面积 [mAU*s] | 峰高 [mAU]  | 峰面积 %   |
|-----|------------|----|----------|-------------|-----------|---------|
| 1   | 6.170      | BB | 0.2524   | 1.06989e4   | 648.59918 | 98.9159 |
| 2   | 8.376      | BB | 0.3124   | 117.26095   | 5.78818   | 1.0841  |

总量 : 1.08162e4 654.38736

**Racemic 3ha:**

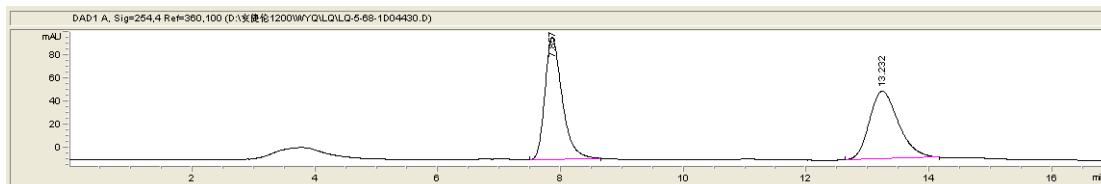

信号 1: DAD1 A, Sig=254,4 Ref=360,100

| 峰 # | 保留时间 [min] | 类型 | 峰宽 [min] | 峰面积 [mAU*s] | 峰高 [mAU]  | 峰面积 %   |
|-----|------------|----|----------|-------------|-----------|---------|
| 1   | 7.857      | BB | 0.2986   | 2064.86230  | 105.37865 | 51.4612 |
| 2   | 13.232     | BB | 0.5061   | 1947.60083  | 58.84399  | 48.5388 |

总量 : 4012.46313 164.22264

**Chiral 3ha:**

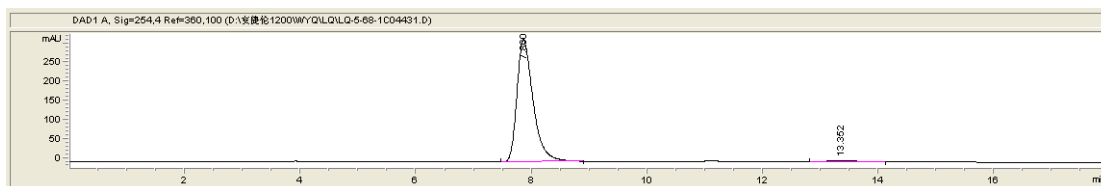

信号 1: DAD1 A, Sig=254,4 Ref=360,100

| 峰 # | 保留时间 [min] | 类型 | 峰宽 [min] | 峰面积 [mAU*s] | 峰高 [mAU]  | 峰面积 %   |
|-----|------------|----|----------|-------------|-----------|---------|
| 1   | 7.860      | BB | 0.2969   | 6282.76709  | 320.22626 | 97.6480 |
| 2   | 13.352     | BB | 0.4904   | 151.32919   | 4.52270   | 2.3520  |

总量 : 6434.09628 324.74896

**Racemic 3ia:**

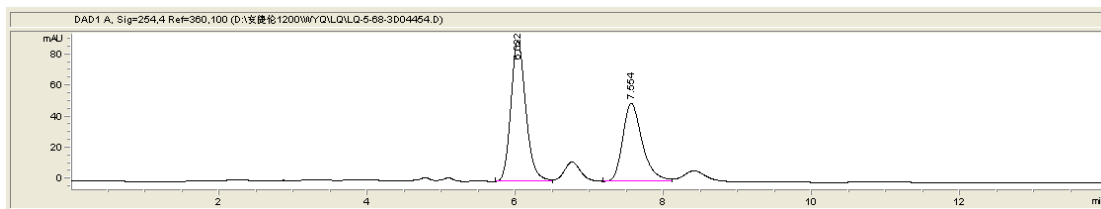

信号 1: DAD1 A, Sig=254,4 Ref=360,100

| 峰 # | 保留时间 [min] | 类型 | 峰宽 [min] | 峰面积 [mAU*s] | 峰高 [mAU] | 峰面积 %   |
|-----|------------|----|----------|-------------|----------|---------|
| 1   | 6.022      | BB | 0.2133   | 1271.23962  | 90.81243 | 57.5364 |
| 2   | 7.554      | VV | 0.2829   | 938.21246   | 50.47276 | 42.4636 |

总量 : 2209.45209 141.28519

**Chiral 3ia:**

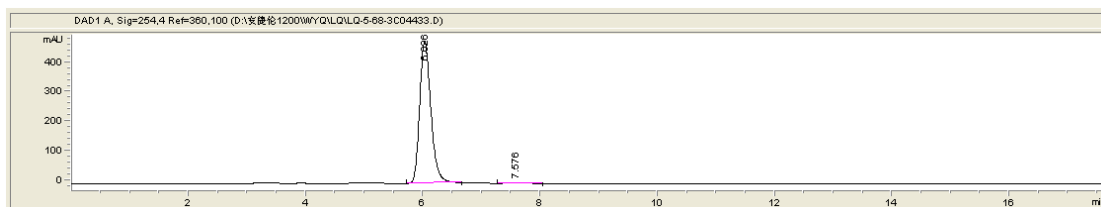

信号 1: DAD1 A, Sig=254,4 Ref=360,100

| 峰 # | 保留时间 [min] | 类型 | 峰宽 [min] | 峰面积 [mAU*s] | 峰高 [mAU]  | 峰面积 %   |
|-----|------------|----|----------|-------------|-----------|---------|
| 1   | 6.026      | BB | 0.2022   | 6371.88818  | 482.14194 | 99.1338 |
| 2   | 7.576      | BB | 0.2672   | 55.67878    | 3.16487   | 0.8662  |

总量 : 6427.56696 485.30681

### Racemic 3ja:

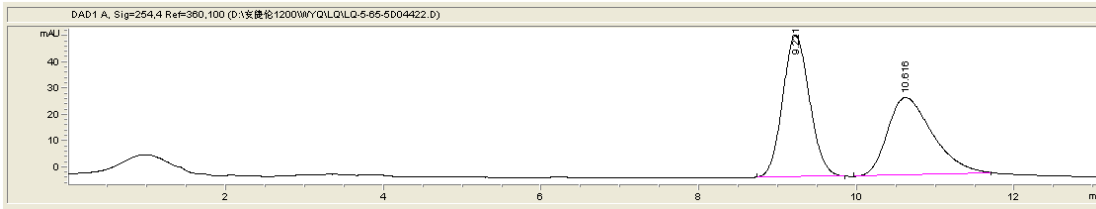

信号 1: DAD1 A, Sig=254,4 Ref=360,100

| 峰 # | 保留时间 [min] | 类型 | 峰宽 [min] | 峰面积 [mAU*s] | 峰高 [mAU] | 峰面积 %   |
|-----|------------|----|----------|-------------|----------|---------|
| 1   | 9.221      | BB | 0.3688   | 1279.62769  | 53.93005 | 51.9491 |
| 2   | 10.616     | BB | 0.6096   | 1183.60596  | 29.65520 | 48.0509 |

总量 : 2463.23364 83.58525

### Chiral 3ja:

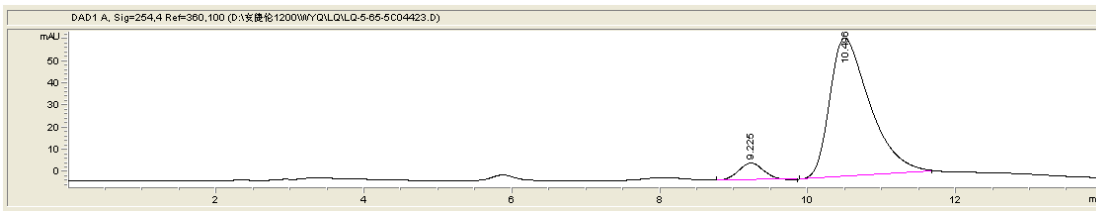

信号 1: DAD1 A, Sig=254,4 Ref=360,100

| 峰 # | 保留时间 [min] | 类型 | 峰宽 [min] | 峰面积 [mAU*s] | 峰高 [mAU] | 峰面积 %   |
|-----|------------|----|----------|-------------|----------|---------|
| 1   | 9.225      | BB | 0.3628   | 179.41418   | 7.56083  | 7.0400  |
| 2   | 10.496     | BB | 0.5745   | 2369.08276  | 62.46379 | 92.9600 |

总量 : 2548.49695 70.02463

### Racemic 4aa:

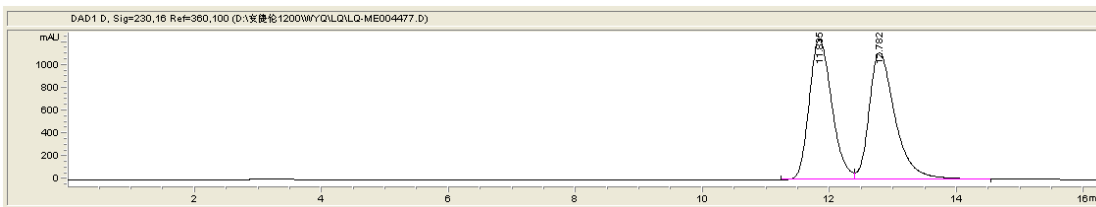

信号 3: DAD1 D, Sig=230,16 Ref=360,100

| 峰 # | 保留时间 [min] | 类型 | 峰宽 [min] | 峰面积 [mAU*s] | 峰高 [mAU]   | 峰面积 %   |
|-----|------------|----|----------|-------------|------------|---------|
| 1   | 11.835     | BV | 0.3840   | 3.03833e4   | 1230.92285 | 49.0153 |
| 2   | 12.782     | VB | 0.4318   | 3.16040e4   | 1111.12488 | 50.9847 |

总量 : 6.19873e4 2342.04773



### Chiral 4aa:

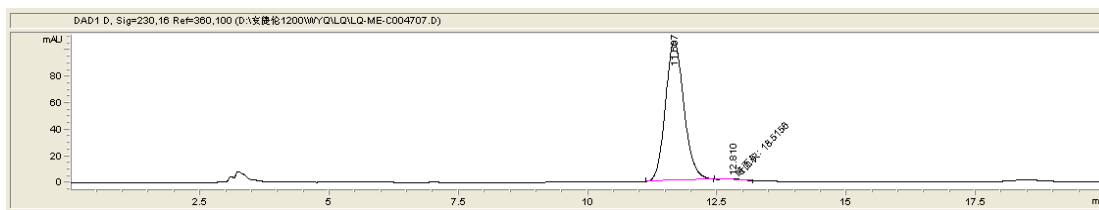

信号 3: DAD1 D, Sig=230,16 Ref=360,100

| 峰 # | 保留时间 [min] | 类型 | 峰宽 [min] | 峰面积 [mAU*s] | 峰高 [mAU]   | 峰面积 %   |
|-----|------------|----|----------|-------------|------------|---------|
| 1   | 11.667     | BB | 0.3855   | 2627.81982  | 105.16831  | 99.3003 |
| 2   | 12.810     | MM | 0.3707   | 18.51560    | 8.32386e-1 | 0.6997  |

总量 : 2646.33542 106.00070

### Racemic 4ab:

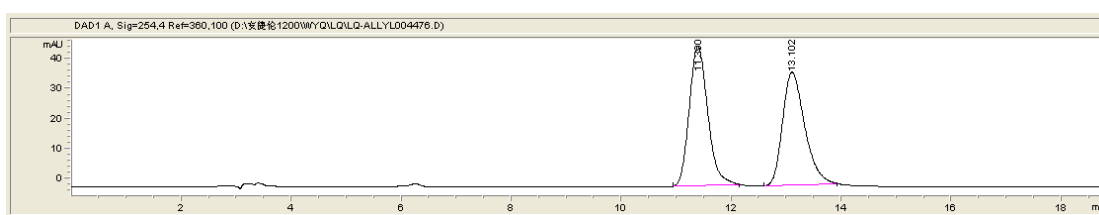

信号 1: DAD1 A, Sig=254,4 Ref=360,100

| 峰 # | 保留时间 [min] | 类型 | 峰宽 [min] | 峰面积 [mAU*s] | 峰高 [mAU] | 峰面积 %   |
|-----|------------|----|----------|-------------|----------|---------|
| 1   | 11.390     | BB | 0.3642   | 1104.48547  | 46.66149 | 50.8154 |
| 2   | 13.102     | BB | 0.4322   | 1069.03857  | 37.76905 | 49.1846 |

总量 : 2173.52405 84.43054

### Chiral 4ab:

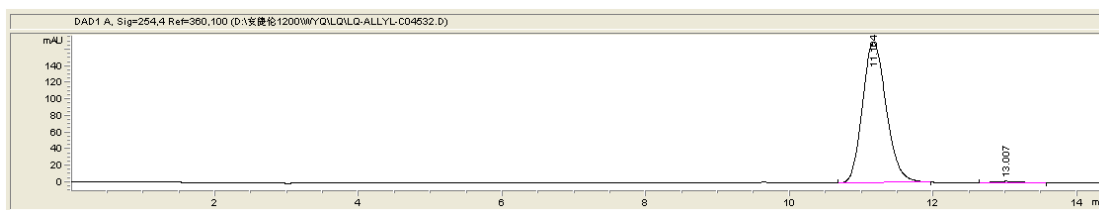

信号 1: DAD1 A, Sig=254,4 Ref=360,100

| 峰 # | 保留时间 [min] | 类型 | 峰宽 [min] | 峰面积 [mAU*s] | 峰高 [mAU]  | 峰面积 %   |
|-----|------------|----|----------|-------------|-----------|---------|
| 1   | 11.164     | BB | 0.3609   | 3911.75342  | 169.70848 | 98.7262 |
| 2   | 13.007     | BB | 0.3731   | 50.46904    | 1.94265   | 1.2738  |

总量 : 3962.22246 171.65113

### Racemic 4ac:

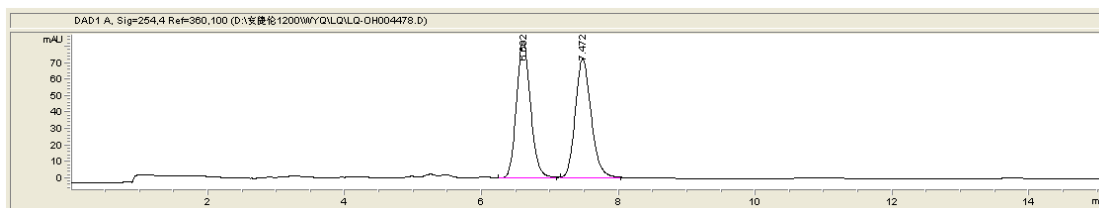

信号 1: DAD1 A, Sig=254,4 Ref=360,100

| 峰 # | 保留时间 [min] | 类型 | 峰宽 [min] | 峰面积 [mAU*s] | 峰高 [mAU] | 峰面积 %   |
|-----|------------|----|----------|-------------|----------|---------|
| 1   | 6.602      | VB | 0.2208   | 1189.84900  | 83.20060 | 50.3480 |
| 2   | 7.472      | BB | 0.2497   | 1173.39954  | 72.16440 | 49.6520 |

总量 : 2363.24854 155.36500

### Chiral 4ac:

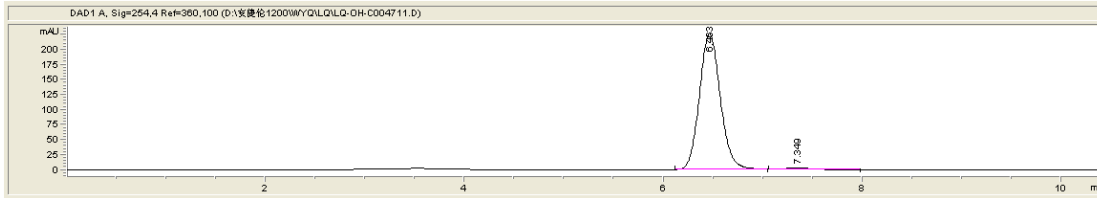

信号 1: DAD1 A, Sig=254,4 Ref=360,100

| 峰 # | 保留时间 [min] | 类型 | 峰宽 [min] | 峰面积 [mAU*s] | 峰高 [mAU]  | 峰面积 %   |
|-----|------------|----|----------|-------------|-----------|---------|
| 1   | 6.463      | BB | 0.2244   | 3312.04932  | 226.71974 | 98.2277 |
| 2   | 7.349      | BB | 0.2793   | 59.75771    | 3.15078   | 1.7723  |

总量 : 3371.80702 229.87052

### Racemic 4ad:

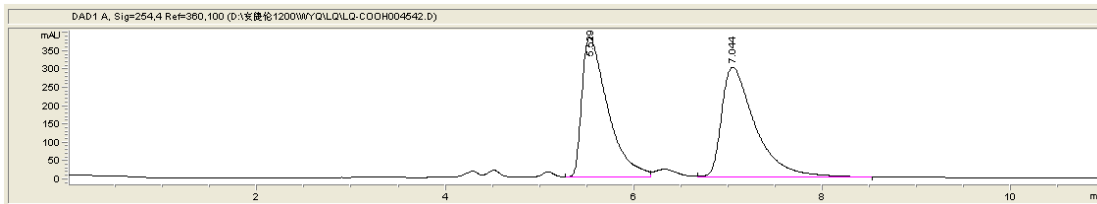

信号 1: DAD1 A, Sig=254,4 Ref=360,100

| 峰 # | 保留时间 [min] | 类型 | 峰宽 [min] | 峰面积 [mAU*s] | 峰高 [mAU]  | 峰面积 %   |
|-----|------------|----|----------|-------------|-----------|---------|
| 1   | 5.529      | VV | 0.2833   | 7341.44873  | 383.49774 | 49.4718 |
| 2   | 7.044      | VB | 0.3706   | 7498.21387  | 301.07443 | 50.5282 |

总量 : 1.48397e4 684.57217

### Chiral 4ad:

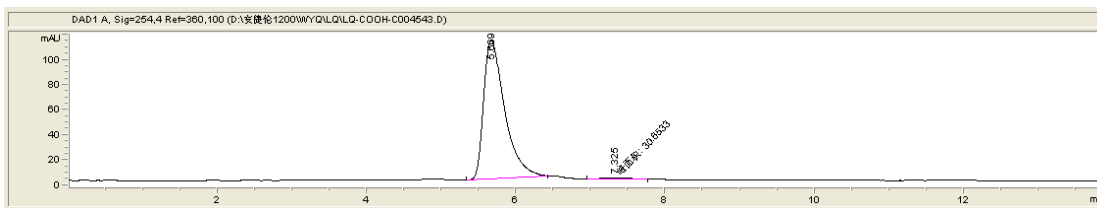

信号 1: DAD1 A, Sig=254,4 Ref=360,100

| 峰 # | 保留时间 [min] | 类型 | 峰宽 [min] | 峰面积 [mAU*s] | 峰高 [mAU]  | 峰面积 %   |
|-----|------------|----|----------|-------------|-----------|---------|
| 1   | 5.669      | BB | 0.2946   | 2169.99731  | 110.75748 | 98.6071 |
| 2   | 7.325      | MM | 0.3949   | 30.65335    | 1.29367   | 1.3929  |

总量 : 2200.65066 112.05115

Racemic 4ae:

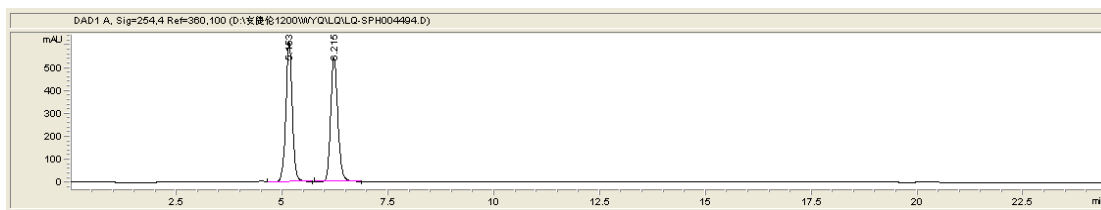

信号 1: DAD1 A, Sig=254,4 Ref=360,100

| 峰 # | 保留时间 [min] | 类型 | 峰宽 [min] | 峰面积 [mAU*s] | 峰高 [mAU]  | 峰面积 %   |
|-----|------------|----|----------|-------------|-----------|---------|
| 1   | 5.153      | VB | 0.1597   | 6509.83594  | 614.13275 | 50.2314 |
| 2   | 6.215      | BB | 0.1829   | 6449.86084  | 541.91736 | 49.7686 |

总量 : 1.29597e4 1156.05011

Chiral 4ae:

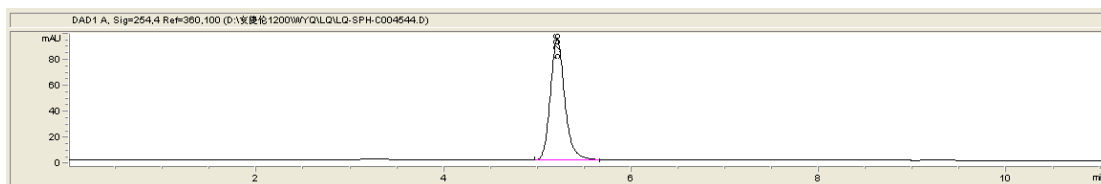

信号 1: DAD1 A, Sig=254,4 Ref=360,100

| 峰 # | 保留时间 [min] | 类型 | 峰宽 [min] | 峰面积 [mAU*s] | 峰高 [mAU] | 峰面积 %    |
|-----|------------|----|----------|-------------|----------|----------|
| 1   | 5.206      | BB | 0.1627   | 993.83258   | 92.97012 | 100.0000 |

总量 : 993.83258 92.97012

Racemic 4af:

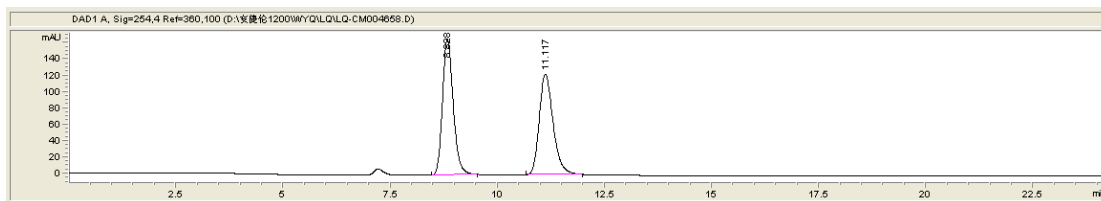

信号 1: DAD1 A, Sig=254,4 Ref=360,100

| 峰 # | 保留时间 [min] | 类型 | 峰宽 [min] | 峰面积 [mAU*s] | 峰高 [mAU]  | 峰面积 %   |
|-----|------------|----|----------|-------------|-----------|---------|
| 1   | 8.828      | BB | 0.2704   | 2913.14819  | 166.27229 | 51.1728 |
| 2   | 11.117     | BB | 0.3454   | 2779.61816  | 123.13933 | 48.8272 |

总量 : 5692.76636 289.41162

Chiral 4af:

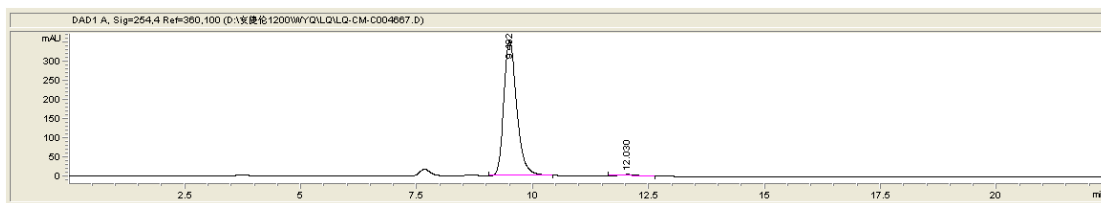

信号 1: DAD1 A, Sig=254,4 Ref=360,100

| 峰 # | 保留时间 [min] | 类型 | 峰宽 [min] | 峰面积 [mAU*s] | 峰高 [mAU]  | 峰面积 %   |
|-----|------------|----|----------|-------------|-----------|---------|
| 1   | 9.492      | VB | 0.2959   | 6881.46680  | 355.36636 | 98.5272 |
| 2   | 12.030     | BB | 0.3789   | 102.86619   | 4.06935   | 1.4728  |

总量 : 6984.33298 359.43572

### Racemic 6a:

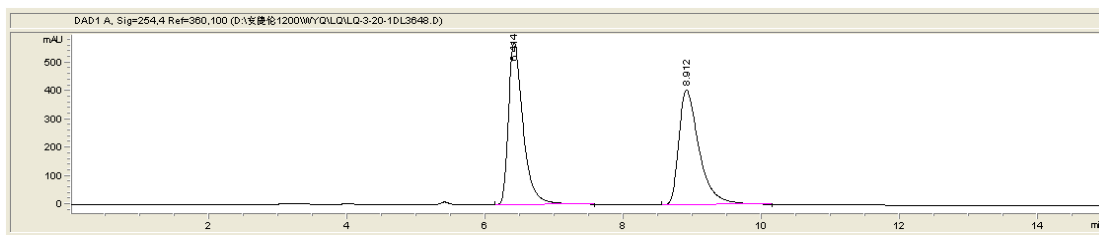

信号 1: DAD1 A, Sig=254,4 Ref=360,100

| 峰 # | 保留时间 [min] | 类型 | 峰宽 [min] | 峰面积 [mAU*s] | 峰高 [mAU]  | 峰面积 %   |
|-----|------------|----|----------|-------------|-----------|---------|
| 1   | 6.414      | BB | 0.2222   | 8446.17090  | 572.25580 | 50.3768 |
| 2   | 8.912      | BB | 0.3117   | 8319.82031  | 404.90045 | 49.6232 |

总量 : 1.67660e4 977.15625

### Chiral 6a:

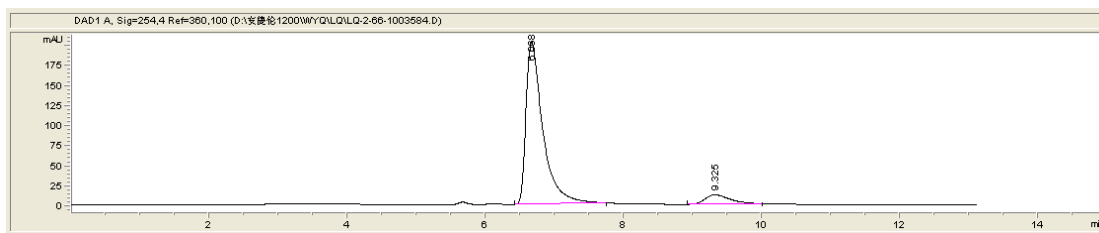

信号 1: DAD1 A, Sig=254,4 Ref=360,100

| 峰 # | 保留时间 [min] | 类型 | 峰宽 [min] | 峰面积 [mAU*s] | 峰高 [mAU]  | 峰面积 %   |
|-----|------------|----|----------|-------------|-----------|---------|
| 1   | 6.668      | BB | 0.2530   | 3436.63403  | 201.42960 | 91.9922 |
| 2   | 9.325      | BB | 0.3870   | 299.15582   | 11.67094  | 8.0078  |

总量 : 3735.78986 213.10054

### Racemic 6b:

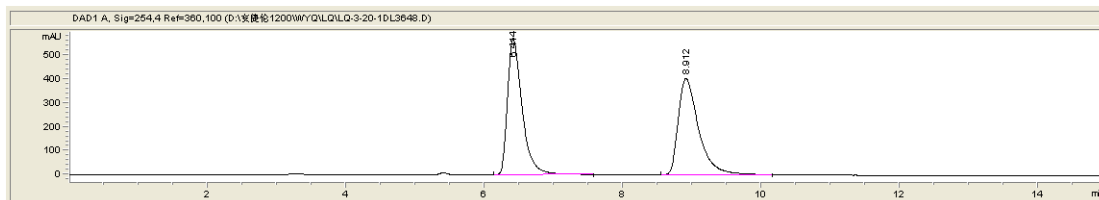

信号 1: DAD1 A, Sig=254,4 Ref=360,100

| 峰 # | 保留时间 [min] | 类型 | 峰宽 [min] | 峰面积 [mAU*s] | 峰高 [mAU]  | 峰面积 %   |
|-----|------------|----|----------|-------------|-----------|---------|
| 1   | 6.414      | BB | 0.2222   | 8446.17090  | 572.25580 | 50.3768 |
| 2   | 8.912      | BB | 0.3117   | 8319.82031  | 404.90045 | 49.6232 |

总量 : 1.67660e4 977.15625

### Chiral 6b:

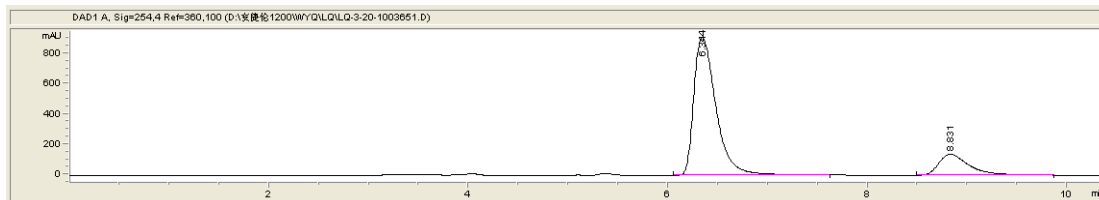

信号 1: DAD1 A, Sig=254,4 Ref=360,100

| 峰 # | 保留时间 [min] | 类型 | 峰宽 [min] | 峰面积 [mAU*s] | 峰高 [mAU]  | 峰面积 %   |
|-----|------------|----|----------|-------------|-----------|---------|
| 1   | 6.344      | BB | 0.2387   | 1.40890e4   | 909.69452 | 82.7344 |
| 2   | 8.831      | BB | 0.3210   | 2940.19141  | 137.74997 | 17.2656 |

总量 : 1.70292e4 1047.44449

Racemic 6c:

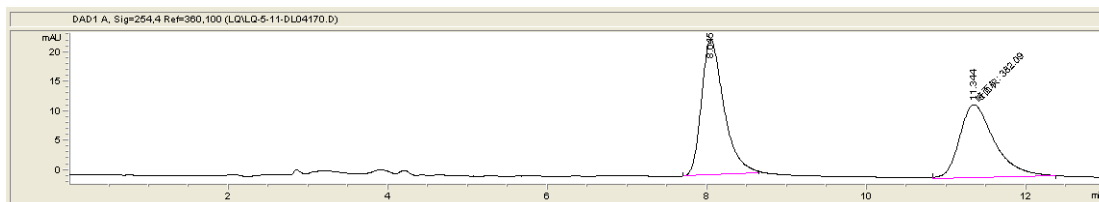

| 峰 # | 保留时间 [min] | 类型 | 峰宽 [min] | 峰面积 [mAU*s] | 峰高 [mAU] | 峰面积 %   |
|-----|------------|----|----------|-------------|----------|---------|
| 1   | 8.045      | BB | 0.2973   | 452.87234   | 23.04215 | 56.2296 |
| 2   | 11.344     | BB | 0.4432   | 352.52563   | 12.12481 | 43.7704 |

总量 : 805.39798 35.16695

Chiral 6c:

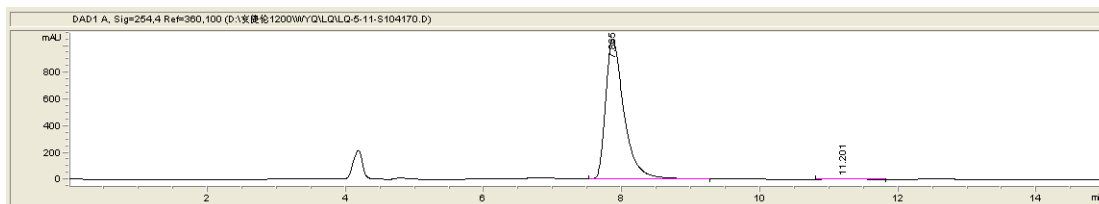

| 峰 # | 保留时间 [min] | 类型 | 峰宽 [min] | 峰面积 [mAU*s] | 峰高 [mAU]   | 峰面积 %   |
|-----|------------|----|----------|-------------|------------|---------|
| 1   | 7.865      | VB | 0.2799   | 1.93487e4   | 1045.77808 | 99.5922 |
| 2   | 11.201     | BB | 0.3972   | 79.23054    | 2.87783    | 0.4078  |

总量 : 1.94279e4 1048.65591

Racemic 6d:

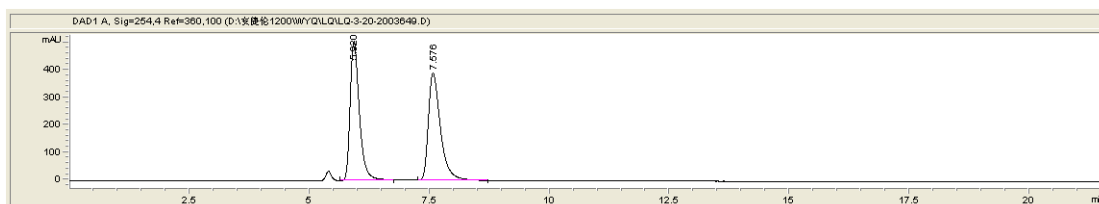

信号 1: DAD1 A, Sig=254,4 Ref=360,100

| 峰 # | 保留时间 [min] | 类型 | 峰宽 [min] | 峰面积 [mAU*s] | 峰高 [mAU]  | 峰面积 %   |
|-----|------------|----|----------|-------------|-----------|---------|
| 1   | 5.920      | VB | 0.2024   | 6786.58936  | 506.38809 | 49.9133 |
| 2   | 7.576      | BB | 0.2640   | 6810.15381  | 389.52136 | 50.0867 |

总量 : 1.35967e4 895.90945

Chiral 6d:

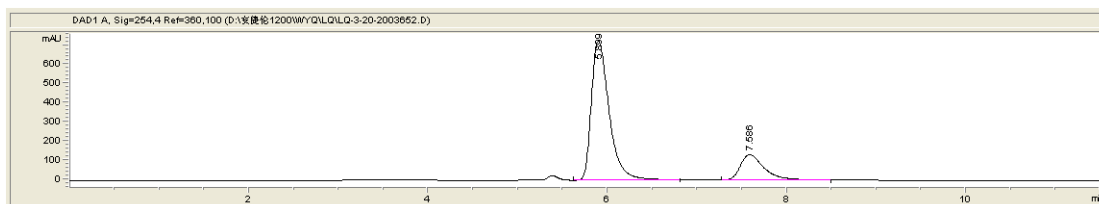

信号 1: DAD1 A, Sig=254,4 Ref=360,100

| 峰 # | 保留时间 [min] | 类型 | 峰宽 [min] | 峰面积 [mAU*s] | 峰高 [mAU]  | 峰面积 %   |
|-----|------------|----|----------|-------------|-----------|---------|
| 1   | 5.899      | VB | 0.2099   | 1.00028e4   | 729.90344 | 80.3806 |
| 2   | 7.586      | BB | 0.2758   | 2441.51172  | 133.24332 | 19.6194 |

总量 : 1.24444e4 863.14676

## Racemic 6e:

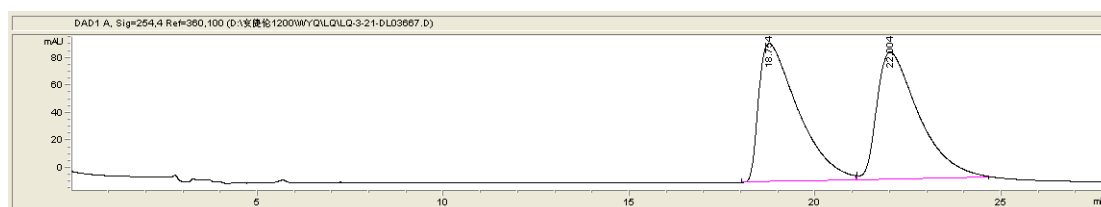

信号 1: DAD1 A, Sig=254,4 Ref=360,100

| 峰 # | 保留时间 [min] | 类型 | 峰宽 [min] | 峰面积 [mAU*s] | 峰高 [mAU]  | 峰面积 %   |
|-----|------------|----|----------|-------------|-----------|---------|
| 1   | 18.754     | BB | 1.0058   | 7420.65186  | 100.68619 | 50.5440 |
| 2   | 22.004     | BB | 1.0627   | 7260.91992  | 92.60964  | 49.4560 |

总量 : 1.46816e4 193.29583

## Chiral 6e:

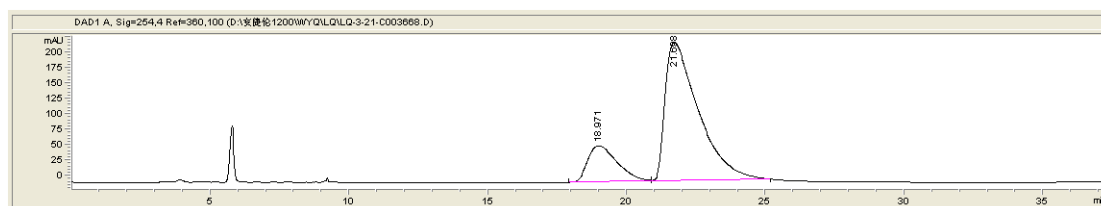

信号 1: DAD1 A, Sig=254,4 Ref=360,100

| 峰 # | 保留时间 [min] | 类型 | 峰宽 [min] | 峰面积 [mAU*s] | 峰高 [mAU]  | 峰面积 %   |
|-----|------------|----|----------|-------------|-----------|---------|
| 1   | 18.971     | BB | 1.0264   | 4289.25879  | 58.16071  | 18.6510 |
| 2   | 21.698     | BB | 1.1584   | 1.87082e4   | 224.00064 | 81.3490 |

总量 : 2.29974e4 282.16135

## 8. References

- [1] Z. B. Zhao, L. Shi, Y. M. Li, F. J. Meng and Y. G. Zhou, Facile synthesis of chiral  $\epsilon$ -sultams via an organocatalytic aza-Friedel–Crafts reaction, *Org. Biomol. Chem.*, 2019, **17**, 6364–6368.
- [2] X. Song, Y. Fan, Z. Zhu and Q. Ni, Chiral phosphoric acid-catalyzed asymmetric arylation of indolizines: atroposelective access to axially chiral 3-arylidolizines, *Org. Lett.*, 2022, **24**, 2315–2320.
- [3] Y. –Q. Wang, X. –Y. Cui, Y. –Y. Ren and Y. Zhang, A highly enantioselective and regioselective organocatalytic direct Mannich reaction of methyl alkyl ketones with cyclic imines benzo[e][1,2,3]oxathiazine 2,2-dioxides, *Org. Biomol. Chem.*, 2014, **12**, 9101–9104.
